# Supplementary material for: FAIRness assessment of the metadata of omics datasets in online repositories
Source: Research Square preprint supplement (doi:10.21203/rs.3.rs-7820760/v1), 2025-11-05
Supplement: Supplementary file 1 [file 3566b2220a6a90453649074c.docx]

This is supplementary material for the manuscript titled ‘FAIRness assessment of metadata of omics datasets in online repositories’.

**S2 Table: Findability and Reusability results of the FAIR evaluator.**

| **FAIR Metric** | **ArrayExpress** | **OmicsDI** | **GEO** | **PRIDE** | **ENA** | **Metabolomics Workbench** | **DbGaP** |
| --- | --- | --- | --- | --- | --- | --- | --- |
| Unique Identifier (F1) | Pass | Pass | Pass | Pass | Pass | Pass | Pass |
| Identifier persistence (F1) | Fail | Fail | Fail | Fail | Fail | Fail | Fail |
| Data identifier persistence (F1) | Fail | Fail | Fail | Fail | Fail | Fail | Fail |
| Structured metadata (F2) | Pass | Fail | Fail | Fail | Pass | Fail | Fail |
| Grounded metadata (F2) | Pass | Fail | Fail | Fail | Pass | Fail | Fail |
| Data identifier explicitly in metadata (F3) | Fail | Fail | Fail | Fail | Fail | Fail | Fail |
| Metadata identifier explicitly in metadata (F3) | Fail | Fail | Fail | Fail | Fail | Fail | Fail |
| Searchable in major search engine (F4) | Fail | Fail | Fail | Fail | Fail | Fail | Fail |
| *Findability results* | [*Link*](https://fairsharing.github.io/FAIR-Evaluator-FrontEnd/#!/evaluations/4109) | [*Link*](https://fairsharing.github.io/FAIR-Evaluator-FrontEnd/#!/evaluations/4118) | [*Link*](https://fairsharing.github.io/FAIR-Evaluator-FrontEnd/#!/evaluations/4126) | [*Link*](https://fairsharing.github.io/FAIR-Evaluator-FrontEnd/#!/evaluations/4127) | [*Link*](https://fairsharing.github.io/FAIR-Evaluator-FrontEnd/#!/evaluations/4143) | [*Link*](https://fairsharing.github.io/FAIR-Evaluator-FrontEnd/#!/evaluations/4144) | [*Link*](https://fairsharing.github.io/FAIR-Evaluator-FrontEnd/#!/evaluations/4145) |
| Metadata includes license – Strong (R1.1) | Fail | Fail | Fail | Fail | Fail | Fail | Fail |
| Metadata includes license – Weak (R1.1) | Fail | Fail | Fail | Fail | Fail | Fail | Fail |
| *Reusability results* | [*Link*](https://fairsharing.github.io/FAIR-Evaluator-FrontEnd/#!/evaluations/4515) | [*Link*](https://fairsharing.github.io/FAIR-Evaluator-FrontEnd/#!/evaluations/4516) | [*Link*](https://fairsharing.github.io/FAIR-Evaluator-FrontEnd/#!/evaluations/4517) | [*Link*](https://fairsharing.github.io/FAIR-Evaluator-FrontEnd/#!/evaluations/4519) | [*Link*](https://fairsharing.github.io/FAIR-Evaluator-FrontEnd/#!/evaluations/4520) | [*Link*](https://fairsharing.github.io/FAIR-Evaluator-FrontEnd/#!/evaluations/4521) | [*Link*](https://fairsharing.github.io/FAIR-Evaluator-FrontEnd/#!/evaluations/4522) |
