# Supplementary material for: FAIRness assessment of the metadata of omics datasets in online repositories
Source: Research Square preprint supplement (doi:10.21203/rs.3.rs-7820760/v1), 2025-11-05
Supplement: Supplementary file 2 [file 9a1f96c94d5d39a71c0a20f7.docx]

**S1 Text**

This is supplementary material for the manuscript titled ‘FAIRness assessment of the metadata of omics datasets in online repositories’.

**Web search**

Each of the web interfaces of the repositories have different options of saving search results mostly in tab separated files. In case the website did not have an option to download the results, we saved the HTML pages of the search result. Not all the repositories we searched returned results for our specific use case. With or without filters, 5 of the repositories returned results for our search terms in the web interface, see Table 5 in the main paper. The web interface on Array Express automatically converted the ‘human’ keyword in our free text search to a filter on ‘Organism’ hence we only count that result on the filtered search. The other 3 repositories had fewer results when the filters were applied. DbGaP had several filters but they were not easily applied along with free text searches.

**API search**

For the API searches we developed a Python script to query the APIs for datasets which can be found at <https://github.com/nirupamaBenis/FAIRnessOmicsRepositories>. The results are stored as comma separated files and added as supplementary material to this paper. The GEO and DbGaP repositories are from the NCBI and used a similar API for retrieval of search results. An initial search must be done to retrieve the ids of experiments matching the search. These retrieved ids are part of another API call to retrieve summaries of those experiments. Results from all the APIs were either in ‘Json’ or ‘XML’, but each API had a different data structure to store the information on the returned datasets. The PRIDE repository returned 5246 results for the free-text API search. Since it is unexpected to have 5246 datasets on a rare disease, we modified the script. We obtained results for each one of the three search terms (in free text) separately and did an intersection of the resulting experiment ids. The API of Metabolomics Workbench only allows free text searches on the title of experiments and offers no filters for searching for datasets.

**Observations**
In our study we found that some repositories were not easy to search. Ideally, all the metadata provided with a dataset, especially the title and description, would be available to be searched on. The search options in the interfaces are choices made by the repositories which could be dependent on the type of omics data and the current research surrounding it. In the case of the Metabolomics Workbench the only relevant field to search on the metadata of the datasets was the title of the experiment, the description or summary of the dataset could not be used in the search. But this repository had the option to return dataset information based on the metabolites targeted in the study which is a common query in the metabolomics field.
