# Supplementary material for: FAIRness assessment of the metadata of omics datasets in online repositories
Source: Research Square preprint supplement (doi:10.21203/rs.3.rs-7820760/v1), 2025-11-05
Supplement: Supplementary file 3 [file 9d3e519f66bb1a70f8db474d.docx]

This is supplementary material for the manuscript titled ‘FAIRness assessment of metadata of omics datasets in online repositories’.

**Additional file 1: Considered repositories.** All the data repositories considered for analysis in this study, listed along with the criteria in which they pass or fail. The repository names in bold and italics were selected for further analysis.

| **Name** | **Source** | **Omics type** | **Experimental data** | **API to search metadata** |
| --- | --- | --- | --- | --- |
| ***ArrayExpress*** | Nature, OmicsDI | Transcriptomics | Yes | Yes |
| Biological General Repository for Interaction Datasets | Nature | Interaction data | No | Yes |
| BioModels | OmicsDI | None | No | Yes |
| Cell Collective | OmicsDI | Models | No | No |
| Database of Interacting Proteins (DIP) | Nature | Interaction data | No | No |
| ***dbGAP*** | Nature, OmicsDI | Genomics | Yes | Yes |
| ***ENA*** | Nature, OmicsDI | Genomics | Yes | Yes |
| EVA | OmicsDI | Genomics | Yes | No |
| ExpressionAtlas | OmicsDI | Transcriptomics | No | Yes |
| FAIRDOMHub Seek | OmicsDI | Models | Yes | No |
| ***Gene Expression Omnibus (GEO)*** | Nature, OmicsDI | Transcriptomics | Yes | Yes |
| GenomeRNAi | Nature | RNA interference | Yes | No |
| Genomic Expression Archive (GEA) | Nature | Transcriptomics | Yes | No |
| Global Natural Products Social Molecular Networking (GNPS) | OmicsDI | Metabolomics | Yes | No |
| Global Proteome Machine Database (GPMDB) | OmicsDI | Proteomics | No | No |
| iProX | Nature | Proteomics | Yes | No |
| IntAct | Nature | Interaction data | No | No |
| Japanese Genotype-phenotype Archive (JGA) | Nature | Genomics | Yes | No |
| Japan ProteOme STandard (JPOST) Repository | OmicsDI | Proteomics | Yes | No |
| Library of Integrated Network-based Cellular Signatures (LINCS) | OmicsDI | Various assays | Yes | No |
| MassIVE | Nature, OmicsDI | Metabolomics | Yes | No |
| MetaboLights | Nature, OmicsDI | Metabolomics | Yes | No |
| MetabolomeExpress | OmicsDI | Metabolomics | No | No |
| ***Metabolomics Workbench*** | OmicsDI | Metabolomics | Yes | Yes |
| NCBI PubChem BioAssay | Nature | Chemical Information | No | Yes |
| NODE | OmicsDI | Various | Yes | No |
| PAXDB | OmicsDI | Proteomics | No | No |
| ***OmicsDI*** |  | Genomics, Transcriptomics, Metabolomics, Proteomics, Models | Yes | Yes |
| Panaroma | Nature | Proteomics | Yes | No |
| PeptideAtlas | Nature, OmicsDI | Proteomics | Yes | No |
| Physiome Model Repository | OmicsDI | Models | No | No |
| ***PRIDE*** | Nature, OmicsDI | Proteomics | Yes | Yes |
| The European Genome-phenome Archive (EGA) | Nature, OmicsDI | Genomics, Phenomics | Yes | No |
