# Supplementary material for: FAIRness assessment of the metadata of omics datasets in online repositories
Source: Research Square preprint supplement (doi:10.21203/rs.3.rs-7820760/v1), 2025-11-05
Supplement: Supplementary file 4 [file ae1ad458203648a08f141812.xlsx]

## Sheet: Description
This is a supplementary file to the manuscript titled 'FAIRness assessment of the metadata of omics datasets in online repositories'
This file contains results of searches on the web interface of chosen repositories. Searches that did not yield any results are not included here. Each tab has the information as we were able to download it from the web interface. The results from ArrayExpress and OmicsDI were made manually from saved HTML files which will be made available as supplementary files
Name of tab	Description
ArrayExpressWebFilter	Results of the search on the web interface of the repository ArrayExpress with filters used for the search terms where possible and the other terms entered as free text to be searched on all possible fields. Filtered for "Organism"
ENAWebFreeText	Results of the search on the web interface of the repository ENA with the search terms entered as free text to be searched on all possible fields.
GEOWebFreeText	Results of the search on the web interface of the repository GEO with the search terms entered as free text to be searched on all possible fields.
GEOWebFilt	Results of the search on the web interface of the repository GEO with filters used for search terms where possible and the other terms entered as free text to be searched on all possible fields. Filtered for "Organism" and "Sample source"
OmicsDIWebFreeText	Results of the search on the webstie of the repository OmicsDI with the search terms entered as free text to be searched on all possible fields.
OmicsDIWebFilter	Results of the search on the web interface of the repository OmicsDI with filters used for search terms where possible and the other terms entered as free text to be searched on all possible fields. Filtered for "Species" and "Tissue"

## Sheet: ArrayExpressWebFilter
Accession	Title	Organism	Description	Validation
E-GEOD-1751	Human blood expression for Huntington's disease versus control	Homo sapiens	Affymetrix U133A expression levels for 12 symptomatic and 5 presymptomatic Huntington's disease patients versus 14 healthy controls. Keywords: other	TRUE
E-GEOD-24250	The transcriptional modulator H2AFY marks Huntington's disease activity in men and mice	Homo sapiens	To accelerate the development of disease-modifying therapeutics for Huntington’s disease (HD), a dynamic biomarker of disease activity and treatment response is critically needed. Venous cellular whole blood from 8 patients with Huntington's disease (HD) and 6 control subjects were collected in PAXgene tubes (Wiagen, Valencia, CA). RNA was isolated from whole blood using the PAXgene blood RNA kit…	TRUE
E-GEOD-54670	Illumina Infinium HumanMethylation450 data for human whole blood samples and for mixtures of purified white blood cells reconstructing human blood	Homo sapiens	The objective of the study was to utilize DNA methylation to quantify human leukocyte subsets in human blood. This file contains data from an Illumina Infinium HumanMethlation450 for human whole blood samples as well as complex mixtures of DNA from purified human leukocyte subtypes in quantities that mimick human blood under different clinical conditions. Bisulphite converted DNA from the samples…	FALSE
E-MTAB-14696	RNA-seq Analysis in Huntington's disease (HD) peripheral blood mononuclear cell samples	Homo sapiens	Huntington's disease (HD) is an autosomal dominant neurodegenerative disease caused by the expansion of the CAG nucleotide repeat in the first exon of the huntingtin (HTT) gene, with an onset between the second and third decades of life and slow progression. The pathogenesis of several of HD involves dysregulation of gene expression, which depends on several molecular processes ranging from trans…	TRUE
E-GEOD-79064	DNA methylation profiling in human Huntington's Disease brain	Homo sapiens	Despite extensive progress in Huntingtonâ??s Disease (HD) research, very little is known about the association of epigenetic variation and HD pathogenesis in human brain tissues. Moreover, its contribution to the tissue-specific transcriptional regulation of the huntingtin gene (HTT), in which HTT expression levels are highest in brain and testes, is currently unknown. To investigate the role of …	FALSE
E-GEOD-51799	Huntington's disease biomarker progression profile identified by transcriptome sequencing in peripheral blood	Homo sapiens	In this study we investigated the suitability of blood to identify HD transcriptomic biomarkers, validated the outcome in an independent cohort and derived a first empiric panel of biomarkers capable of predicting HD motor scores. Finally we examined whether patient gene expression profiles could provide information about HD affected biological pathways. Examination of differentially expressed ge…	TRUE
E-GEOD-54647	VeraCode GoldenGate Methylation Assay microarray data for purified human leukocytes, reconstruction mixtures and human whole blood samples	Homo sapiens	The objective of the study was to utilize DNA methylation to quantify human leukocyte subsets in human blood. This file contains data from an Illumina custom VeraCode GGMA microarray for human leukocyte subtypes (purified from whole blood samples via magnetic activated cell sorting (MACS) and purity confirmed by flourescence activated cell sorting (FACS)) as well as for complex mixtures of DNA fr…	FALSE
E-GEOD-29678	Expression profiling of human peripheral blood before and after omega 3 dietary supplement.	Homo sapiens	Patients with early stage CLL were recruited into the study and administered a course of omega 3 dietary supplements. Expression profiling of each patient was performed at baseline (before administering the supplement) and after consumption of supplements. Patients were divided into two groups according to the level of NFkB activation at baseline, and then within each of the two groups significan…	FALSE
E-GEOD-8762	Lymphocyte gene expression data from moderate stage HD patients and controls	Homo sapiens	Highly quantitative biomarkers of neurodegenerative disease remain an important need in the urgent quest for disease modifying therapies. For Huntington's disease (HD), a genetic test is available (trait marker), but necessary state markers are still in development. In this report, we describe a large battery of transcriptomic tests explored as state biomarker candidates. In an attempt to exploit…	FALSE
E-GEOD-54671	Quantitative reconstruction of leukocyte subsets using DNA methylation	Homo sapiens	This SuperSeries is composed of the SubSeries listed below. Refer to individual Series	FALSE
E-GEOD-55468	Genome-wide analysis of gene expression variation in CD4+ T cells from patients with active rheumatoid arthritis (RA).	Homo sapiens	Analysis of the regulatory architecture of gene expression variation in CD4+ T cells from patients with active RA. We have integrated gene expression with genotyping data in order to identify eQTLs that characterize the gene expression of CD4+ T cells in active RA. CD4+ T cell RNA was extracted from 26 patients with active RA. All samples were used to study the genetic regulatory mechanisms of CD…	FALSE
E-MTAB-3732	A comprehensive human expression map	Homo sapiens	A compiled human gene expression, ontology-annotated dataset from publicly available data including 27887 Affymetrix HG-U133Plus2 arrays, filtered for quality control. The dataset contains samples from healthy individuals, from individuals with disease (including cancer) and cell lines.	FALSE
E-GEOD-56298	Allele-Specific Methylation Occurs at Genetic Variants Associated with Complex Disease	Homo sapiens	We use targeted bisulfite PCR and next-generation 454 sequencing of multiple amplicons to analyze the association of cis-regulated allele-specific methylation (ASM) with multiple complex disease-associated variants in a population of 82 individuals. We detect ASM at four variants implicated in complex phenotypes such as ulcerative colitis and AIDS progression disease (rs10491434), Celiac disease …	FALSE
E-TABM-185	hgu133a integrated dataset	Homo sapiens	hgu133a integrated dataset integrated from ArrayExpress and GEO	FALSE
E-GEOD-23834	Recurrent disruption of HIP1 identified in patients with epilepsy, learning difficulties, intellectual disability, and neurobehavioral abnormalities	Homo sapiens	We report 12 individuals from ten unrelated families with epilepsy, learning difficulties, intellectual disability, and neurobehavioral abnormalities, who segregated a microdeletion distally adjacent to the Williams-Beuren syndrome region. In six families, a recurrent ~ 1.1 Mb deletion likely resulted from nonallelic homologous recombination between flanking large complex low-copy repeats. Three …	FALSE
E-GEOD-64887	Expression data from Plasmodium falciparum schizonts	Plasmodium falciparum	During intra-erythrocytic development, late asexually replicating Plasmodium falciparum parasites sequester from peripheral circulation. This facilitates chronic infection and is linked to severe disease and organ-specific pathology including cerebral and placental malaria. Immature gametocytes M-bM-^@M-^S sexual stage precursor cells M-bM-^@M-^S likewise disappear from circulation. Recent work h…	FALSE
E-GEOD-71220	The effect of statins on blood gene expression in COPD	Homo sapiens	Background: COPD is currently the fourth leading cause of death worldwide and predicted to rank third by 2020. Statins are commonly used lipid lowering agents with documented benefits on cardiovascular morbidity and mortality, and have also been shown to have pleiotropic effects including anti-inflammatory and anti-oxidant activity. Objective: Identify a gene signature associated with statin use …	FALSE
E-MTAB-1425	Transcription profiling by array of human lymphoblastoid cell lines derived from 400 children from families recruited through a proband with asthma	Homo sapiens	We have created a global map of the effects of polymorphism on gene expression in 400 children from families recruited through a proband with asthma. We genotyped 408,273 SNPs and identified expression quantitative trait loci from measurements of 54,675 transcripts representing 20,599 genes in Epstein-Barr virusﾡﾧCtransformed lymphoblastoid cell lines. We executed genome-wide association scans fo…	FALSE
E-MTAB-1428	Transcription profiling by array of 550 children from families recruited through a proband with atopic dermatitis	Homo sapiens	We have created a global map of the effects of polymorphism on gene expression in 550 children from families recruited through a proband with atopic dermatitis. We genotyped >300,000 SNPs and identified expression quantitative trait loci from measurements of 16,487 probes representing 15,576 genes in Epstein-Barr virus¨Ctransformed lymphoblastoid cell lines. We executed genome-wide association sc…	FALSE

## Sheet: ENAWebFreeText
Accession	Organism	Description	Validation
ERP133995	Homo sapiens	Transcriptome sequencing of human induced pluripotent stem cell-derived brain endothelial cells. Overall design: Examined one time point (Day 10 of differentiation) in triplicate from three different iPSC_BMECs. Sample name: iBMEC_33Q, iBMEC_71Q and iBMEC_109Q iBMEC: (iPSC)-derived brain-like microvascular endothelial cells Total samples: 9	FALSE

## Sheet: GEOWebFreeText
1. UBE2F inhibits Natural Killer cell tumor immunity by activating the ARIH2-CRL5 complex to degrade interleukin 15 receptors
(Submitter supplied) Interleukin-15 receptor (IL-15R) agonists induce anti-tumor immunity in pre-clinical models, however, dose-limiting toxicity has hampered their clinical development. An alternative is to target pathways downstream of the IL-15R to access different therapeutic profiles. We performed genome-wide CRISPR screens to reveal the complete IL15R signaling mechanism in NK cells and dis…
Organism:	Homo sapiens
Type:		Expression profiling by high throughput sequencing
Platform: GPL18573 9 Samples
FTP download: GEO (TSV) ftp://ftp.ncbi.nlm.nih.gov/geo/series/GSE296nnn/GSE296451/
Series		Accession: GSE296451	ID: 200296451
VALIDATION: FALSE
2. Fingerprint of circulating microRNAs identify acute ischemic stroke patients
(Submitter supplied) Aim of the present study is to identify all circulating miRNAs that are modulated in patients with stroke, to select specific miRNAs to be used as disease biomarkers to improve both diagnosis and prognosis. Background. Stroke is the second-most common cause of death worldwide. The major factor limiting prognosis in patients affected by acute stroke is the very limited therape…
Organism:	synthetic construct; Homo sapiens
Type:		Non-coding RNA profiling by array
Platform: GPL21572 9 Samples
FTP download: GEO (CEL) ftp://ftp.ncbi.nlm.nih.gov/geo/series/GSE255nnn/GSE255070/
Series		Accession: GSE255070	ID: 200255070
VALIDATION: FALSE
3. Transcriptomic analysis of RNA Granules and Exosomes: Unmasking the Intra- and Intercellular organelle overlap in Huntington's Disease
(Submitter supplied) Introduction:Repetitive RNA sequences like CAG repeats that trigger aberrant RNA-protein interactions cause several neurodegenerative diseases including Huntington's disease (HD). Importantly, these aberrant RNA-protein complexes also seed the formation of cytoplasmic liquid-like granules, such as the stress granules. Emerging evidence demonstrates that granules formed via li…
Organism:	Homo sapiens
Type:		Expression profiling by high throughput sequencing
Platform: GPL24676 20 Samples
FTP download: GEO (SF) ftp://ftp.ncbi.nlm.nih.gov/geo/series/GSE261nnn/GSE261143/
Series		Accession: GSE261143	ID: 200261143
VALIDATION: Maybe
4. Huntingtin is an RNA binding protein and participates in NEAT1-mediated paraspeckles
(Submitter supplied) Huntingtin protein, mutated in Huntington disease, is implicated in nucleic acid- mediated processes, yet evidence for direct huntingtin-nucleic acid interaction is limited. Here we show wildtype and mutant huntingtin co-purify with nucleic acids, primarily RNA, and interact directly with G-rich RNAs in in vitro assays. Huntingtin RNA immunoprecipitation sequencing from patie…
Organism:	Homo sapiens
Type:		Other
Platform: GPL20795 30 Samples
FTP download: GEO (TSV) ftp://ftp.ncbi.nlm.nih.gov/geo/series/GSE267nnn/GSE267435/
Series		Accession: GSE267435	ID: 200267435
VALIDATION: FALSE
5. DOT1L controls NK cell maturation and lineage integrity
(Submitter supplied) This SuperSeries is composed of the SubSeries listed below.
Organism:	Mus musculus
Type:		Expression profiling by high throughput sequencing; Genome binding/occupancy profiling by high throughput sequencing
Platforms: GPL30215 GPL19057 27 Samples
FTP download: GEO (BIGWIG) ftp://ftp.ncbi.nlm.nih.gov/geo/series/GSE222nnn/GSE222235/
Series		Accession: GSE222235	ID: 200222235
VALIDATION: FALSE
6. DOT1L controls NK cell maturation and lineage integrity [RNA-seq D5]
(Submitter supplied) In the innate immune system, natural killer (NK) cells represent a highly important subset of cells with utmost importance in the control of transformed cell and tumour inflammation. Previous studies showed that NK cells can convert into ILC1-like cells in a TGF-β-rich tumour microenvironment (TME). In addition, cancer patients with acute myeloid leukemia (AML) or chronic lym…
Organism:	Mus musculus
Type:		Expression profiling by high throughput sequencing
Platform: GPL30215 6 Samples
FTP download: GEO (CSV) ftp://ftp.ncbi.nlm.nih.gov/geo/series/GSE222nnn/GSE222234/
Series		Accession: GSE222234	ID: 200222234
VALIDATION: FALSE
7. Transcriptomics coupled proteomics reveals the critical signaling pathways regulating OVA antigen-specific CD8+ T cells in mouse spleen and liver
(Submitter supplied) Background: Antigen-specific T cells are particularly important for eliminating bacterial infection, and the dynamics in this process help uncover the mechanisms by which bacteria are eliminated.Results: In this study, we sorted the antigen-specific CD8+ T cell in the mouse liver and spleen at 5, 7, and 14 days after infection of Listeria monocytogenes expressing the OVA prot…
Organism:	Mus musculus
Type:		Expression profiling by high throughput sequencing
Platform: GPL24247 18 Samples
FTP download: GEO (TXT) ftp://ftp.ncbi.nlm.nih.gov/geo/series/GSE263nnn/GSE263368/
Series		Accession: GSE263368	ID: 200263368
VALIDATION: FALSE
8. Impact of elraglusib (9-ING-41) treatment on gene expression in human colorectal cancer and immune cell lines.
(Submitter supplied) A growing body of literature evaluates the potential anti-cancer and immunostimulatory effects of GSK-3 inhibition. Accordingly, we sought to evaluate GSK-3 inhibitor elraglusib (9-ING-41) and its impact on gene expression in both human colorectal cancer (CRC) cell lines and human immune cell lines. We used microarrays to detail the differential gene expression that occurs po…
Organism:	Homo sapiens
Type:		Expression profiling by array
Platform: GPL17586 30 Samples
FTP download: GEO (CEL) ftp://ftp.ncbi.nlm.nih.gov/geo/series/GSE222nnn/GSE222849/
Series		Accession: GSE222849	ID: 200222849
VALIDATION: FALSE
9. Circulating non-coding RNAs in Huntington disease
(Submitter supplied) We performed a study of whole non-coding RNA expression profiles, by microarray, in plasma from 9 patients with Huntington disease (CH) in early stage and 13 controls: 8 healthy subjects (HD) and 5 patients with schizophrenia (SC). The CH patients were under antipsychotic drugs, the most effective treatment option also in SC patient (we included in the study SC control group …
Organism:	synthetic construct; Homo sapiens
Type:		Non-coding RNA profiling by array
Platform: GPL14613 22 Samples
FTP download: GEO (CEL) ftp://ftp.ncbi.nlm.nih.gov/geo/series/GSE167nnn/GSE167630/
Series		Accession: GSE167630	ID: 200167630
VALIDATION: TRUE
10. DNA Methylation Study of Huntington's Disease and Motor Progression in Three Species
(Submitter supplied) This SuperSeries is composed of the SubSeries listed below.
Organism:	Homo sapiens; Mus musculus; Ovis aries; Rattus norvegicus
Type:		Methylation profiling by genome tiling array; Methylation profiling by high throughput sequencing
Platforms: GPL13534 GPL28271 GPL11002 348 Samples
FTP download: GEO (BED, IDAT, TXT) ftp://ftp.ncbi.nlm.nih.gov/geo/series/GSE147nnn/GSE147004/
Series		Accession: GSE147004	ID: 200147004
VALIDATION: TRUE
11. DNA methylation profiles from a transgenic sheep model of Huntington's disease
(Submitter supplied) An Infinium microarray platform (HorvathMammalMethylChip40) was used to generate DNA methylation data from n=168 blood samples of a transgenic sheep model of Huntington's disease. 84 transgenic sheep and age matched control sheep.
Organism:	Homo sapiens; Mus musculus; Ovis aries; Rattus norvegicus
Type:		Methylation profiling by genome tiling array
Platform: GPL28271 168 Samples
FTP download: GEO (IDAT) ftp://ftp.ncbi.nlm.nih.gov/geo/series/GSE147nnn/GSE147003/
Series		Accession: GSE147003	ID: 200147003
VALIDATION: FALSE
12. DNA methylation profiles from a mouse model of Huntington's disease
(Submitter supplied) An Infinium microarray platform (HorvathMammalMethylChip40) was used to generate DNA methylation data from mouse tissues of a heterozygous Huntingtin expansion knock-in (Q175) and wildtype (WT) controls. Mouse tissues: blood, liver, brain cortex, brain cerebellum, and striatum.
Organism:	Homo sapiens; Mus musculus; Rattus norvegicus
Type:		Methylation profiling by genome tiling array
Platform: GPL28271 72 Samples
FTP download: GEO (IDAT) ftp://ftp.ncbi.nlm.nih.gov/geo/series/GSE147nnn/GSE147002/
Series		Accession: GSE147002	ID: 200147002
VALIDATION: FALSE
13. Expression profiling of four replicates of MCF-7 cells treated with 100nM TCDD
(Submitter supplied) The aryl hydrocarbon receptor (AHR) is a ligand-activated transcription factor that binds pollutants, therapeutic drugs and endogenous ligands. The AHR is expressed in all breast cancer subtypes and it can switch the aggressiveness of breast cancer cells from low to high depending on the ligand that it binds. Jagged 1 (JAG1) is a NOTCH receptor ligand that is overexpressed in…
Organism:	Homo sapiens
Type:		Expression profiling by high throughput sequencing
Platform: GPL18460 4 Samples
FTP download: GEO (TXT) ftp://ftp.ncbi.nlm.nih.gov/geo/series/GSE98nnn/GSE98514/
SRA Run Selector: https://www.ncbi.nlm.nih.gov/Traces/study/?acc=PRJNA385320
Series		Accession: GSE98514	ID: 200098514
VALIDATION: FALSE
14. G-Protein-Coupled Receptor 68 Negatively Regulates IL-22 Production in Human Th17 Cells
(Submitter supplied) Purpose: To identify novel genes regulated by the aryl hydrocarbon receptor that influence human Th17 cell function. Methods: Naïve CD4 T cells from peripheral blood of six healthy human volunteers were cultured under four experimental conditions for three days: anti-CD3 and anti-CD28 antibodies (Media control), Media with Th17 conditions (IL-6, TGF-b, IL-1b, IL-23), Th17+FIC…
Organism:	Homo sapiens
Type:		Expression profiling by high throughput sequencing
Platform: GPL18460 24 Samples
FTP download: GEO (CSV, TXT) ftp://ftp.ncbi.nlm.nih.gov/geo/series/GSE102nnn/GSE102045/
SRA Run Selector: https://www.ncbi.nlm.nih.gov/Traces/study/?acc=PRJNA396484
Series		Accession: GSE102045	ID: 200102045
VALIDATION: FALSE
15. The role and mechanism of erythrocyte invasion by Francisella tularensis
(Submitter supplied) Francisella tularensis, is an extremely virulent bacterium that can be transmitted naturally by blood sucking arthropods. During mammalian infection, F. tularensis infects numerous types of host cells, including erythrocytes. As erythrocytes do not undergo phagocytosis or endocytosis, it remains unknown how F. tularensis invades these cells. Furthermore, the consequence of in…
Organism:	Francisella tularensis
Type:		Expression profiling by high throughput sequencing
Platform: GPL22893 10 Samples
FTP download: GEO (TXT) ftp://ftp.ncbi.nlm.nih.gov/geo/series/GSE93nnn/GSE93233/
SRA Run Selector: https://www.ncbi.nlm.nih.gov/Traces/study/?acc=PRJNA360386
Series		Accession: GSE93233	ID: 200093233
VALIDATION: FALSE
16. Expression profiling of MCF-7 cells with treatment of TCDD
(Submitter supplied) This SuperSeries is composed of the SubSeries listed below.
Organism:	Homo sapiens
Type:		Expression profiling by high throughput sequencing
Platform: GPL18460 12 Samples
FTP download: GEO ftp://ftp.ncbi.nlm.nih.gov/geo/series/GSE98nnn/GSE98515/
Series		Accession: GSE98515	ID: 200098515
VALIDATION: FALSE
17. Expression profiling of MCF-7 cells with 10nM treatment of TCDD
(Submitter supplied) The aryl hydrocarbon receptor (AHR) is a ligand-activated transcription factor that is regulated by environmental toxicants that function as AHR agonists such as 2,3,7,8 tetrachlorodibenzo-p-dioxin (TCDD). L-Type Amino Acid Transporter 1 (LAT1) is a leucine uptake transporter that is overexpressed in cancer. The regulation of LAT1 by AHR in MCF-7 and MDA-MB-231 breast cancer …
Organism:	Homo sapiens
Type:		Expression profiling by high throughput sequencing
Platform: GPL18460 8 Samples
FTP download: GEO (TXT) ftp://ftp.ncbi.nlm.nih.gov/geo/series/GSE76nnn/GSE76608/
SRA Run Selector: https://www.ncbi.nlm.nih.gov/Traces/study/?acc=PRJNA308136
Series		Accession: GSE76608	ID: 200076608
VALIDATION: FALSE
18. The effect of statins on blood gene expression in COPD
(Submitter supplied) Background: COPD is currently the fourth leading cause of death worldwide and predicted to rank third by 2020. Statins are commonly used lipid lowering agents with documented benefits on cardiovascular morbidity and mortality, and have also been shown to have pleiotropic effects including anti-inflammatory and anti-oxidant activity. Objective: Identify a gene signature associ…
Organism:	Homo sapiens
Type:		Expression profiling by array
Platform: GPL11532 617 Samples
FTP download: GEO (CEL) ftp://ftp.ncbi.nlm.nih.gov/geo/series/GSE71nnn/GSE71220/
Series		Accession: GSE71220	ID: 200071220
VALIDATION: FALSE
19. Expression profiling of WI38 normal lung fibroblasts following overexpression of p53 and/or Retinoblastoma
(Submitter supplied) RNA expression profiling was performed on normal human lung fibroblast WI38 cells following overexpression of p53 and pRb, in order to identify genes co-regulated and involved in mediating p53 and pRb tumor suppressor processes.
Organism:	Homo sapiens
Type:		Expression profiling by array
Platform: GPL4133 16 Samples
FTP download: GEO (TXT) ftp://ftp.ncbi.nlm.nih.gov/geo/series/GSE59nnn/GSE59660/
Series		Accession: GSE59660	ID: 200059660
VALIDATION: FALSE
20. Human RORγt+ CD34+ cells are lineage-specified progenitors of group 3 RORγt+ innate lymphoid cells
(Submitter supplied) Group 3 innate lymphoid cells (ILC3) are defined by the expression of RORγt, which is selectively required for their development. The lineage-specified progenitor cells of human ILC3 and their developmental site after birth remain undefined. Here we identified a novel population of human CD34+ hematopoietic progenitor cells (HPC) expressing RORγt and sharing with ILC3 a disti…
Organism:	Homo sapiens
Type:		Expression profiling by array
Platform: GPL17077 35 Samples
FTP download: GEO (TXT) ftp://ftp.ncbi.nlm.nih.gov/geo/series/GSE63nnn/GSE63197/
Series		Accession: GSE63197	ID: 200063197
VALIDATION: FALSE
21. Expression profiling of human peripheral blood before and after omega 3 dietary supplement.
(Submitter supplied) Patients with early stage CLL were recruited into the study and administered a course of omega 3 dietary supplements. Expression profiling of each patient was performed at baseline (before administering the supplement) and after consumption of supplements. Patients were divided into two groups according to the level of NFkB activation at baseline, and then within each of the …
Organism:	Homo sapiens
Type:		Expression profiling by array
Platform: GPL6480 23 Samples
FTP download: GEO (TXT) ftp://ftp.ncbi.nlm.nih.gov/geo/series/GSE29nnn/GSE29678/
Series		Accession: GSE29678	ID: 200029678
VALIDATION: FALSE
22. Effect of GRHL2 in HMLE+Twist-ER+4-OHT cells
(Submitter supplied) Grainyhead genes are involved in wound healing and developmental neural tube closure. In light of the high degree of similarity between the epithelial-mesenchymal transitions (EMTs) occurring in wound healing processes and the cancer stem cell-like compartment of tumors, including TGF-β-dependence, we investigated the role of a Grainyhead gene (GRHL2) in oncogenic EMT. Grainy…
Organism:	Homo sapiens
Type:		Expression profiling by array
Platform: GPL5175 6 Samples
FTP download: GEO (CEL) ftp://ftp.ncbi.nlm.nih.gov/geo/series/GSE36nnn/GSE36081/
Series		Accession: GSE36081	ID: 200036081
VALIDATION: FALSE
23. E2F7 represses a transcriptional network of oscillating cell cycle genes to control S-phase progression.
(Submitter supplied) E2F transcription factors are known to be important for timely activation of G1/S and G2/M genes required for cell cycle progression, but transcriptional mechanisms for deactivation of cell cycle regulated genes are unknown. Here, we show that E2F7 is highly expressed during mid to late S-phase, occupies promoters of G1/S regulated genes and represses its transcription. ChIP-…
Organism:	Homo sapiens
Type:		Genome binding/occupancy profiling by high throughput sequencing
Platforms: GPL9442 GPL20148 3 Samples
FTP download: GEO (BAM, COD) ftp://ftp.ncbi.nlm.nih.gov/geo/series/GSE32nnn/GSE32673/
SRA Run Selector: https://www.ncbi.nlm.nih.gov/Traces/study/?acc=PRJNA147031
Series		Accession: GSE32673	ID: 200032673
VALIDATION: FALSE
24. Expression profiles of human osteoblasts directly and indirectly damaged by chemotherapy
(Submitter supplied) This SuperSeries is composed of the SubSeries listed below.
Organism:	Homo sapiens
Type:		Expression profiling by array
Platform: GPL4133 20 Samples
FTP download: GEO (TXT) ftp://ftp.ncbi.nlm.nih.gov/geo/series/GSE17nnn/GSE17860/
Series		Accession: GSE17860	ID: 200017860
VALIDATION: FALSE
25. Human osteoblast treated with recombinant TGF-beta
(Submitter supplied) Global expression profile of human osteoblast treated with recombinant TGF-beta compared to human osteoblast treated with growth media alone
Organism:	Homo sapiens
Type:		Expression profiling by array
Platform: GPL4133 6 Samples
FTP download: GEO (TXT) ftp://ftp.ncbi.nlm.nih.gov/geo/series/GSE17nnn/GSE17843/
Series		Accession: GSE17843	ID: 200017843
VALIDATION: FALSE
26. Human osteoblast treated with chemotherapy-treated bone marrow stromal cell conditioned media
(Submitter supplied) Global expression profile of human osteoblast treated with chemotherapy-treated bone marrow stromal cell conditioned media, compared to human osteoblast cells treated with diluent-control bone marrow stromal cell conditioned media. Goal is to identify genes regulated by chemotherapy in osteoblasts.
Organism:	Homo sapiens
Type:		Expression profiling by array
Platform: GPL4133 6 Samples
FTP download: GEO (TXT) ftp://ftp.ncbi.nlm.nih.gov/geo/series/GSE17nnn/GSE17842/
Series		Accession: GSE17842	ID: 200017842
VALIDATION: FALSE
27. Human osteoblast treated with Melphalen
(Submitter supplied) Global expression profile of human osteoblast treated with melphalen, compared to human osteoblast cells treated with diluent control
Organism:	Homo sapiens
Type:		Expression profiling by array
Platform: GPL4133 8 Samples
FTP download: GEO (TXT) ftp://ftp.ncbi.nlm.nih.gov/geo/series/GSE17nnn/GSE17839/
Series		Accession: GSE17839	ID: 200017839
VALIDATION: FALSE
28. Recurrent disruption of HIP1 identified in patients with epilepsy, learning difficulties, intellectual disability, and neurobehavioral abnormalities
(Submitter supplied) We report 12 individuals from ten unrelated families with epilepsy, learning difficulties, intellectual disability, and neurobehavioral abnormalities, who segregated a microdeletion distally adjacent to the Williams-Beuren syndrome region. In six families, a recurrent ~ 1.1 Mb deletion likely resulted from nonallelic homologous recombination between flanking large complex low…
Organism:	Homo sapiens
Type:		Genome variation profiling by genome tiling array
Platform: GPL10858 12 Samples
FTP download: GEO (PAIR, TXT) ftp://ftp.ncbi.nlm.nih.gov/geo/series/GSE23nnn/GSE23834/
Series		Accession: GSE23834	ID: 200023834
VALIDATION: TRUE
29. PGC1alpha overexpression in human white adipose cells
(Submitter supplied) Subcutaneous abdominal adipose tissue was obtained from female subjects undergoing plastic surgery in agreement with French laws on biomedical research. Stromal cells prepared from WAT were cultured for 13 days in a chemically defined medium. At day 13, 60–80% of cells were differentiated into lipid droplet-containing adipocytes. The cells were infected at a m.o.i. of 200 for…
Organism:	Homo sapiens
Type:		Expression profiling by array
Platforms: GPL3941 GPL3942 16 Samples
FTP download: GEO ftp://ftp.ncbi.nlm.nih.gov/geo/series/GSE5nnn/GSE5184/
Series		Accession: GSE5184	ID: 200005184
VALIDATION: FALSE
30. [Mouse430_2] Affymetrix Mouse Genome 430 2.0 Array
(Submitter supplied) Affymetrix submissions are typically submitted to GEO using the GEOarchive method described at http://www.ncbi.nlm.nih.gov/projects/geo/info/geo_affy.html June 03, 2009: annotation table updated with netaffx build 28 June 07, 2012: annotation table updated with netaffx build 32 June 23, 2016: annotation table updated with netaffx build 35 Protocol: see manufacturer's web site…
Organism:	Mus musculus
601 DataSets 4560 Series 40 Related Platforms 59068 Samples
FTP download: GEO ftp://ftp.ncbi.nlm.nih.gov/geo/platforms/GPL1nnn/GPL1261/
Platform	Accession: GPL1261	ID: 100001261
VALIDATION: FALSE
31. PLASMA-CH-VL-26-06-13
Organism:	Homo sapiens
Source name:	PLASMA
Platform: GPL14613 Series: GSE167630
FTP download: GEO (CEL) ftp://ftp.ncbi.nlm.nih.gov/geo/samples/GSM5111nnn/GSM5111627/
Sample		Accession: GSM5111627	ID: 305111627
VALIDATION: FALSE
32. PLASMA-CH-SI-26-06-13
Organism:	Homo sapiens
Source name:	PLASMA
Platform: GPL14613 Series: GSE167630
FTP download: GEO (CEL) ftp://ftp.ncbi.nlm.nih.gov/geo/samples/GSM5111nnn/GSM5111626/
Sample		Accession: GSM5111626	ID: 305111626
VALIDATION: FALSE
33. PLASMA-CH-SV-20-06-13
Organism:	Homo sapiens
Source name:	PLASMA
Platform: GPL14613 Series: GSE167630
FTP download: GEO (CEL) ftp://ftp.ncbi.nlm.nih.gov/geo/samples/GSM5111nnn/GSM5111625/
Sample		Accession: GSM5111625	ID: 305111625
VALIDATION: FALSE
34. PLASMA-CH-RB-20-06-13
Organism:	Homo sapiens
Source name:	PLASMA
Platform: GPL14613 Series: GSE167630
FTP download: GEO (CEL) ftp://ftp.ncbi.nlm.nih.gov/geo/samples/GSM5111nnn/GSM5111624/
Sample		Accession: GSM5111624	ID: 305111624
VALIDATION: FALSE
35. PLASMA-CH-QM-20-06-13
Organism:	Homo sapiens
Source name:	PLASMA
Platform: GPL14613 Series: GSE167630
FTP download: GEO (CEL) ftp://ftp.ncbi.nlm.nih.gov/geo/samples/GSM5111nnn/GSM5111623/
Sample		Accession: GSM5111623	ID: 305111623
VALIDATION: FALSE
36. PLASMA-CH-FP-27-06-13
Organism:	Homo sapiens
Source name:	PLASMA
Platform: GPL14613 Series: GSE167630
FTP download: GEO (CEL) ftp://ftp.ncbi.nlm.nih.gov/geo/samples/GSM5111nnn/GSM5111622/
Sample		Accession: GSM5111622	ID: 305111622
VALIDATION: FALSE
37. PLASMA-CH-FA-27-06-13
Organism:	Homo sapiens
Source name:	PLASMA
Platform: GPL14613 Series: GSE167630
FTP download: GEO (CEL) ftp://ftp.ncbi.nlm.nih.gov/geo/samples/GSM5111nnn/GSM5111621/
Sample		Accession: GSM5111621	ID: 305111621
VALIDATION: FALSE
38. PLASMA-CH-CA-27-06-13
Organism:	Homo sapiens
Source name:	PLASMA
Platform: GPL14613 Series: GSE167630
FTP download: GEO (CEL) ftp://ftp.ncbi.nlm.nih.gov/geo/samples/GSM5111nnn/GSM5111620/
Sample		Accession: GSM5111620	ID: 305111620
VALIDATION: FALSE
39. PLASMA-CH-AG-26-06-13
Organism:	Homo sapiens
Source name:	PLASMA
Platform: GPL14613 Series: GSE167630
FTP download: GEO (CEL) ftp://ftp.ncbi.nlm.nih.gov/geo/samples/GSM5111nnn/GSM5111619/
Sample		Accession: GSM5111619	ID: 305111619
VALIDATION: FALSE

## Sheet: GEOWebFilter
1. UBE2F inhibits Natural Killer cell tumor immunity by activating the ARIH2-CRL5 complex to degrade interleukin 15 receptors
(Submitter supplied) Interleukin-15 receptor (IL-15R) agonists induce anti-tumor immunity in pre-clinical models, however, dose-limiting toxicity has hampered their clinical development. An alternative is to target pathways downstream of the IL-15R to access different therapeutic profiles. We performed genome-wide CRISPR screens to reveal the complete IL15R signaling mechanism in NK cells and dis…
Organism:	Homo sapiens
Type:		Expression profiling by high throughput sequencing
Platform: GPL18573 9 Samples
FTP download: GEO (TSV) ftp://ftp.ncbi.nlm.nih.gov/geo/series/GSE296nnn/GSE296451/
Series		Accession: GSE296451	ID: 200296451
VALIDATION: FALSE
2. Circulating non-coding RNAs in Huntington disease
(Submitter supplied) We performed a study of whole non-coding RNA expression profiles, by microarray, in plasma from 9 patients with Huntington disease (CH) in early stage and 13 controls: 8 healthy subjects (HD) and 5 patients with schizophrenia (SC). The CH patients were under antipsychotic drugs, the most effective treatment option also in SC patient (we included in the study SC control group …
Organism:	synthetic construct; Homo sapiens
Type:		Non-coding RNA profiling by array
Platform: GPL14613 22 Samples
FTP download: GEO (CEL) ftp://ftp.ncbi.nlm.nih.gov/geo/series/GSE167nnn/GSE167630/
Series		Accession: GSE167630	ID: 200167630
VALIDATION: TRUE
3. DNA Methylation Study of Huntington's Disease and Motor Progression in Three Species
(Submitter supplied) This SuperSeries is composed of the SubSeries listed below.
Organism:	Homo sapiens; Mus musculus; Ovis aries; Rattus norvegicus
Type:		Methylation profiling by genome tiling array; Methylation profiling by high throughput sequencing
Platforms: GPL13534 GPL28271 GPL11002 348 Samples
FTP download: GEO (BED, IDAT, TXT) ftp://ftp.ncbi.nlm.nih.gov/geo/series/GSE147nnn/GSE147004/
Series		Accession: GSE147004	ID: 200147004
VALIDATION: FALSE
4. DNA methylation profiles from a transgenic sheep model of Huntington's disease
(Submitter supplied) An Infinium microarray platform (HorvathMammalMethylChip40) was used to generate DNA methylation data from n=168 blood samples of a transgenic sheep model of Huntington's disease. 84 transgenic sheep and age matched control sheep.
Organism:	Homo sapiens; Mus musculus; Ovis aries; Rattus norvegicus
Type:		Methylation profiling by genome tiling array
Platform: GPL28271 168 Samples
FTP download: GEO (IDAT) ftp://ftp.ncbi.nlm.nih.gov/geo/series/GSE147nnn/GSE147003/
Series		Accession: GSE147003	ID: 200147003
VALIDATION: FALSE
5. DNA methylation profiles from a mouse model of Huntington's disease
(Submitter supplied) An Infinium microarray platform (HorvathMammalMethylChip40) was used to generate DNA methylation data from mouse tissues of a heterozygous Huntingtin expansion knock-in (Q175) and wildtype (WT) controls. Mouse tissues: blood, liver, brain cortex, brain cerebellum, and striatum.
Organism:	Homo sapiens; Mus musculus; Rattus norvegicus
Type:		Methylation profiling by genome tiling array
Platform: GPL28271 72 Samples
FTP download: GEO (IDAT) ftp://ftp.ncbi.nlm.nih.gov/geo/series/GSE147nnn/GSE147002/
Series		Accession: GSE147002	ID: 200147002
VALIDATION: FALSE
6. Human RORγt+ CD34+ cells are lineage-specified progenitors of group 3 RORγt+ innate lymphoid cells
(Submitter supplied) Group 3 innate lymphoid cells (ILC3) are defined by the expression of RORγt, which is selectively required for their development. The lineage-specified progenitor cells of human ILC3 and their developmental site after birth remain undefined. Here we identified a novel population of human CD34+ hematopoietic progenitor cells (HPC) expressing RORγt and sharing with ILC3 a disti…
Organism:	Homo sapiens
Type:		Expression profiling by array
Platform: GPL17077 35 Samples
FTP download: GEO (TXT) ftp://ftp.ncbi.nlm.nih.gov/geo/series/GSE63nnn/GSE63197/
Series		Accession: GSE63197	ID: 200063197
VALIDATION: FALSE
7. Recurrent disruption of HIP1 identified in patients with epilepsy, learning difficulties, intellectual disability, and neurobehavioral abnormalities
(Submitter supplied) We report 12 individuals from ten unrelated families with epilepsy, learning difficulties, intellectual disability, and neurobehavioral abnormalities, who segregated a microdeletion distally adjacent to the Williams-Beuren syndrome region. In six families, a recurrent ~ 1.1 Mb deletion likely resulted from nonallelic homologous recombination between flanking large complex low…
Organism:	Homo sapiens
Type:		Genome variation profiling by genome tiling array
Platform: GPL10858 12 Samples
FTP download: GEO (PAIR, TXT) ftp://ftp.ncbi.nlm.nih.gov/geo/series/GSE23nnn/GSE23834/
Series		Accession: GSE23834	ID: 200023834
VALIDATION: FALSE
8. PLASMA-CH-VL-26-06-13
Organism:	Homo sapiens
Source name:	PLASMA
Platform: GPL14613 Series: GSE167630
FTP download: GEO (CEL) ftp://ftp.ncbi.nlm.nih.gov/geo/samples/GSM5111nnn/GSM5111627/
Sample		Accession: GSM5111627	ID: 305111627
VALIDATION: Maybe
9. PLASMA-CH-SI-26-06-13
Organism:	Homo sapiens
Source name:	PLASMA
Platform: GPL14613 Series: GSE167630
FTP download: GEO (CEL) ftp://ftp.ncbi.nlm.nih.gov/geo/samples/GSM5111nnn/GSM5111626/
Sample		Accession: GSM5111626	ID: 305111626
VALIDATION: Maybe
10. PLASMA-CH-SV-20-06-13
Organism:	Homo sapiens
Source name:	PLASMA
Platform: GPL14613 Series: GSE167630
FTP download: GEO (CEL) ftp://ftp.ncbi.nlm.nih.gov/geo/samples/GSM5111nnn/GSM5111625/
Sample		Accession: GSM5111625	ID: 305111625
VALIDATION: Maybe
11. PLASMA-CH-RB-20-06-13
Organism:	Homo sapiens
Source name:	PLASMA
Platform: GPL14613 Series: GSE167630
FTP download: GEO (CEL) ftp://ftp.ncbi.nlm.nih.gov/geo/samples/GSM5111nnn/GSM5111624/
Sample		Accession: GSM5111624	ID: 305111624
VALIDATION: Maybe
12. PLASMA-CH-QM-20-06-13
Organism:	Homo sapiens
Source name:	PLASMA
Platform: GPL14613 Series: GSE167630
FTP download: GEO (CEL) ftp://ftp.ncbi.nlm.nih.gov/geo/samples/GSM5111nnn/GSM5111623/
Sample		Accession: GSM5111623	ID: 305111623
VALIDATION: Maybe
13. PLASMA-CH-FP-27-06-13
Organism:	Homo sapiens
Source name:	PLASMA
Platform: GPL14613 Series: GSE167630
FTP download: GEO (CEL) ftp://ftp.ncbi.nlm.nih.gov/geo/samples/GSM5111nnn/GSM5111622/
Sample		Accession: GSM5111622	ID: 305111622
VALIDATION: Maybe
14. PLASMA-CH-FA-27-06-13
Organism:	Homo sapiens
Source name:	PLASMA
Platform: GPL14613 Series: GSE167630
FTP download: GEO (CEL) ftp://ftp.ncbi.nlm.nih.gov/geo/samples/GSM5111nnn/GSM5111621/
Sample		Accession: GSM5111621	ID: 305111621
VALIDATION: Maybe
15. PLASMA-CH-CA-27-06-13
Organism:	Homo sapiens
Source name:	PLASMA
Platform: GPL14613 Series: GSE167630
FTP download: GEO (CEL) ftp://ftp.ncbi.nlm.nih.gov/geo/samples/GSM5111nnn/GSM5111620/
Sample		Accession: GSM5111620	ID: 305111620
VALIDATION: Maybe
16. PLASMA-CH-AG-26-06-13
Organism:	Homo sapiens
Source name:	PLASMA
Platform: GPL14613 Series: GSE167630
FTP download: GEO (CEL) ftp://ftp.ncbi.nlm.nih.gov/geo/samples/GSM5111nnn/GSM5111619/
Sample		Accession: GSM5111619	ID: 305111619
VALIDATION: Maybe

## Sheet: MetabolomicsWorkbenchWebFreeTex
Id	Title	Validation
ST000405	Metabolomic Profiling in Early Pregnancy using Pre-Diagnostic Sera from Women Who Developed Placental Abruption	FALSE
ST002442	Alterations in CSF Urea Occur in Late Manifest Stage Huntington Disease	FALSE

## Sheet: OmicsDIWebFreeText
Id	Name	Organism	Description	Validation
PXD023175	A blood atlas of COVID-19 defines hallmarks of disease severity and specificity	Homo Sapiens	Treatment of severe COVID-19 is currently limited by clinical heterogeneity and incomplete description of specific immune biomarkers. We present here a comprehensive multi-omic blood atlas for patients with varying COVID-19 severity in an integrated comparison with influenza and sepsis patients versus healthy volunteers. We identify immune signatures and correlates of host response. Hallmarks of …	FALSE
GSE71220	The effect of statins on blood gene expression in COPD	Homo Sapiens	Background: COPD is currently the fourth leading cause of death worldwide and predicted to rank third by 2020. Statins are commonly used lipid lowering agents with documented benefits on cardiovascular morbidity and mortality, and have also been shown to have pleiotropic effects including anti-inflammatory and anti-oxidant activity. Objective: Identify a gene signature associated with statin use …	FALSE
PXD045072	Helicobacter pylori induces a novel form of innate immune memory via accumulation of NF-кB proteins	Homo Sapiens	Helicobacter pylori is a widespread Gram-negative pathogen involved in a variety of gastrointestinal diseases, including gastritis, ulceration, mucosa-associated lymphoid tissue (MALT) lymphoma and gastric cancer. Immune responses aimed at eradication of H. pylori often prove futile, and paradoxically play a crucial role in the degeneration of epithelial integrity and disease progression. We have…	FALSE
PXD022817	COVIDomics_plasma_2020_DDA-PASEF	Homo Sapiens	In order to investigate variations in the endotype of COVID19 patients, we completed an integrated analysis of 112 research participants, including 74 COVID19 patients versus 37 SARS-CoV-2 negative controls. COVID19 patients tested positive for SARS-CoV-2 infection by PCR and/or antibody testing and were hospitalized due to COVID19 symptoms, but none of them had developed severe pathology requiri…	FALSE
PXD037004	Effect of hypoxia and treatment with cyclosporine A on chemotaxis of RAMOS B cells	Homo Sapiens	Background: Hypoxia is a potent molecular signal for cellular metabolism, mitochondrial function, and migration. Conditions of low oxygen tension trigger regulatory cascades mediated via the highly conserved HIF-1 α post-translational modification system. In the adaptive immune response, B cells (Bc) are activated and differentiate under hypoxic conditions within lymph node germinal centers, and …	FALSE
PXD063595	UBE2F inhibits Natural Killer cell tumor immunity by activating the ARIH2-CRL5 complex to degrade interleukin 15 receptors	Homo Sapiens	Interleukin-15 receptor (IL-15R) agonists induce anti-tumor immunity in pre-clinical models, however, dose-limiting toxicity has hampered their clinical development. An alternative is to target pathways downstream of the IL-15R to access different therapeutic profiles. We performed genome-wide CRISPR screens to reveal the complete IL15R signaling mechanism in NK cells and discovered ubiquitin-dep…	FALSE
PXD022672	Metabolic reprogramming and host-immune response against Crimean-Congo Hemorrhagic Fever Viruses (CCHFV) during acute infection	Homo Sapiens	The pathogenesis and host viral interactions of the Crimean–Congo hemorrhagic fever virus (CCHFV) are convoluted and have not been evaluated previously. To understand the host immune responses against CCHFV, we have performed a global transcriptomic analysis of peripheral blood mononuclear cells from a longitudinal cohort of CCHF patients who survived, and a temporal untargeted proteomics analysi…	FALSE
GSE5184	PGC1alpha overexpression in human white adipose cells	Homo Sapiens	Subcutaneous abdominal adipose tissue was obtained from female subjects undergoing plastic surgery in agreement with French laws on biomedical research. Stromal cells prepared from WAT were cultured for 13 days in a chemically defined medium. At day 13, 60–80% of cells were differentiated into lipid droplet-containing adipocytes. The cells were infected at a m.o.i. of 200 for 6 h. The day after i…	FALSE
E-GEOD-24250	The transcriptional modulator H2AFY marks Huntington's disease activity in men and mice	Homo Sapiens	To accelerate the development of disease-modifying therapeutics for Huntington’s disease (HD), a dynamic biomarker of disease activity and treatment response is critically needed. Venous cellular whole blood from 8 patients with Huntington's disease (HD) and 6 control subjects were collected in PAXgene tubes (Wiagen, Valencia, CA). RNA was isolated from whole blood using the PAXgene blood RNA kit…	TRUE
S-EPMC9321930	Modelling the Human Blood–Brain Barrier in Huntington Disease	Homo Sapiens	While blood–brain barrier (BBB) dysfunction has been described in neurological disorders, including Huntington’s disease (HD), it is not known if endothelial cells themselves are functionally compromised when promoting BBB dysfunction. Furthermore, the underlying mechanisms of BBB dysfunction remain elusive given the limitations with mouse models and post mortem tissue to identify primary deficit…	FALSE
PXD044025	Proteomic analysis of methylmalonic acidemia fibroblasts	Homo Sapiens	Methylmalonic academia (MMA) is a rare inborn error of the metabolism due to defects of the methylmalonyl-CoA mutase (MUT) enzyme that result in methylmalonic acid accumulation in the blood and increased excretion in urine. Affected patients can manifest vomiting, dehydration, hypotonia, developmental delay and failure to thrive. The emergency treatment of the newborns with MMA mainly comprises r…	FALSE
S-EPMC6175010	Detailed analysis of HTT repeat elements in human blood using targeted amplification-free long-read sequencing.	Homo Sapiens	Amplification of DNA is required as a mandatory step during library preparation in most targeted sequencing protocols. This can be a critical limitation when targeting regions that are highly repetitive or with extreme guanine-cytosine (GC) content, including repeat expansions associated with human disease. Here, we used an amplification-free protocol for targeted enrichment utilizing the CRISPR/…	FALSE
S-EPMC8011966	Increasing brain palmitoylation rescues behavior and neuropathology in Huntington disease mice.	Mus musculus	Huntington disease (HD) damages the corticostriatal circuitry in large part by impairing transport of brain-derived neurotrophic factor (BDNF). We hypothesized that improving vesicular transport of BDNF could slow or prevent disease progression. We therefore performed selective proteomic analysis of vesicles transported within corticostriatal projecting neurons followed by in silico screening and…	FALSE
S-EPMC8516942	Age-related mitochondrial alterations in brain and skeletal muscle of the YAC128 model of Huntington disease.	Mus musculus	Mitochondrial dysfunction and bioenergetics failure are common pathological hallmarks in Huntington's disease (HD) and aging. In the present study, we used the YAC128 murine model of HD to examine the effects of mutant huntingtin on mitochondrial parameters related to aging in brain and skeletal muscle. We have conducted a cross-sectional natural history study of mitochondrial DNA changes in the …	FALSE
S-EPMC3193232	Transcriptional modulator H2A histone family, member Y (H2AFY) marks Huntington disease activity in man and mouse.	Homo Sapiens	Huntington disease (HD) is a progressive neurodegenerative disease that affects 30,000 individuals in North America. Treatments that slow its relentless course are not yet available, and biomarkers that can reliably measure disease activity and therapeutic response are urgently needed to facilitate their development. Here, we interrogated 119 human blood samples for transcripts associated with HD…	TRUE
S-EPMC11613659	Ascertainment of uninterrupted CAG repeat length and disease-modifying variants in fragment-based genetic testing for Huntington Disease.	NA	NA	FALSE
MSV000094509	Multi-epitope immunocapture of huntingtin reveals striatum-selective molecular signatures in Huntington's disease mouse models	Homo Sapiens, Mus Musculus	Huntington's disease (HD) is a debilitating progressive neurodegenerative disorder that has profound effects on an individual's cognitive, motor, and behavioral functions. HD is caused by mutation in the huntingtin (HTT) gene that results in CAG repeat expansion and production of an aggregation-prone polyglutamine-containing protein (mHTT). The expression of mHTT causes selective degeneration, ma…	Maybe
S-EPMC8049011	Statistical method for modeling sequencing data from different technologies in longitudinal studies with application to Huntington disease.	Homo Sapiens	Advancement of gene expression measurements in longitudinal studies enables the identification of genes associated with disease severity over time. However, problems arise when the technology used to measure gene expression differs between time points. Observed differences between the results obtained at different time points can be caused by technical differences. Modeling the two measurements j…	FALSE
PXD020601	Serum proteomics in COVID-19 patients: Altered coagulation and complement status as a function of IL-6 level	Homo Sapiens	Over 5 million people around the world have tested positive for the beta coronavirus SARS-CoV- 2 as of May 29, 2020, a third of which in the United States alone. These infections are associated with the development of a disease known as COVID-19, which is characterized by several symptoms, including persistent dry cough, shortness of breath, chills, muscle pain, headache, loss of taste or smell, …	FALSE
S-EPMC9352962	A probable cis-acting genetic modifier of Huntington disease frequent in individuals with African ancestry.	Homo Sapiens	Huntington disease (HD)is a dominantly inherited neurodegenerative disorder caused by the expansion of a polyglutamine encoding CAG repeat in the huntingtin gene. Recently, it has been established that disease severity in HD is best predicted by the number of pure CAG repeats rather than total glutamines encoded. Along with uncovering DNA repair gene variants as trans-acting modifiers of HD sever…	TRUE
MSV000087310	Enterically derived high density lipoprotein restrains liver injury via the portal vein	Mus musculus	The proteomes of HDL subspecies, HDL2 and HDL3, from pooled human serum purified by density gradient centrifugation were generated and compared to the proteomes of HDL2 and HDL3 derived from tportal venouhe s and antecubital venous blood matched across these two locations from the same individual. The latter were purified by size exclusion chromatography coupled with immunoprecipitation with anti…	FALSE
S-EPMC5733638	Molecular interactions governing host-specificity of blood stage malaria parasites.	NA	Non-human primates harbor diverse species of malaria parasites, including the progenitors of Plasmodium falciparum and Plasmodium vivax. Cross-species transmission of some malaria parasites-most notably the macaque parasite, Plasmodium knowlesi-continues to this day, compelling the scientific community to ask whether these zoonoses could impede malaria control efforts by acting as a source of rec…	FALSE
S-EPMC4341019	Selection and characterization of llama single domain antibodies against N-terminal huntingtin.	Homo Sapiens	Huntington disease is caused by expansion of a CAG repeat in the huntingtin gene that is translated into an elongated polyglutamine stretch within the N-terminal domain of the huntingtin protein. The mutation is thought to introduce a gain-of-toxic function in the mutant huntingtin protein, and blocking this toxicity by antibody binding could alleviate Huntington disease pathology. Llama single d…	FALSE
PXD038477	FAIMS-DIA Proteomics of LIRIL2R-Deficient Induced Regulatory T Cells	Homo Sapiens	Long non-coding RNA, LIRIL2R was identified and confirmed to be differentially expressed in regulatory T cells by RNAseq. A role of LIRIL2R was studied in iTreg cells using multiple approaches. Data independent analysis proteomics revealed effects of LIRIL2R knock down in Treg cells. Loss of Treg signature proteins upon LIRIL2R knock down signified the its role in iTreg cell development and funct…	FALSE
S-EPMC4350773	Blood-brain barrier breakdown in the aging human hippocampus.	Homo Sapiens	The blood-brain barrier (BBB) limits entry of blood-derived products, pathogens, and cells into the brain that is essential for normal neuronal functioning and information processing. Post-mortem tissue analysis indicates BBB damage in Alzheimer's disease (AD). The timing of BBB breakdown remains, however, elusive. Using an advanced dynamic contrast-enhanced MRI protocol with high spatial and tem…	FALSE
E-GEOD-71220	The effect of statins on blood gene expression in COPD	Homo Sapiens	Background: COPD is currently the fourth leading cause of death worldwide and predicted to rank third by 2020. Statins are commonly used lipid lowering agents with documented benefits on cardiovascular morbidity and mortality, and have also been shown to have pleiotropic effects including anti-inflammatory and anti-oxidant activity. Objective: Identify a gene signature associated with statin use …	FALSE
PRJEB49487	Blood brain barrier dysfunction in a 2D in vitro Blood brain barrier model of Huntington Disease.	Homo Sapiens	Transcriptome sequencing of human induced pluripotent stem cell-derived brain endothelial cells. Overall design: Examined one time point (Day 10 of differentiation) in triplicate from three different iPSC_BMECs. Sample name: iBMEC_33Q, iBMEC_71Q and iBMEC_109Q iBMEC: (iPSC)-derived brain-like microvascular endothelial cells Total samples: 9	FALSE
S-EPMC6367058	Blood-brain barrier breakdown is an early biomarker of human cognitive dysfunction.	Homo Sapiens	Vascular contributions to cognitive impairment are increasingly recognized1-5 as shown by neuropathological6,7, neuroimaging4,8-11, and cerebrospinal fluid biomarker4,12 studies. Moreover, small vessel disease of the brain has been estimated to contribute to approximately 50% of all dementias worldwide, including those caused by Alzheimer's disease (AD)3,4,13. Vascular changes in AD have been typ…	FALSE
S-EPMC11416711	Developing a transwell millifluidic device for studying blood-brain barrier endothelium.	NA	NA	FALSE
S-EPMC9200056	Parallel imaging of coagulation pathway proteases activated protein C, thrombin, and factor Xa in human plasma.	Homo Sapiens	Activated protein C (APC), thrombin, and factor (f) Xa are vitamin K-dependent serine proteases that are key factors in blood coagulation. Moreover, they play important roles in inflammation, apoptosis, fibrosis, angiogenesis, and viral infections. Abnormal activity of these coagulation factors has been related to multiple conditions, such as bleeding and thrombosis, Alzheimer's disease, sepsis, …	FALSE
S-EPMC9101250	Mapping the prothrombin-binding site of pseutarin C by site-directed PEGylation.	Homo Sapiens	The prothrombinase complex processes prothrombin to thrombin through sequential cleavage at Arg320 followed by Arg271 when cofactor, factor (f) Va, protease, fXa, and substrate, prothrombin, are all bound to the same membrane surface. In the absence of the membrane or cofactor, cleavage occurs in the opposite order. For the less favorable cleavage site at Arg320 to be cleaved first, it is thought…	FALSE
S-EPMC1474138	Comprehensive association testing of common mitochondrial DNA variation in metabolic disease.	Homo Sapiens	Many lines of evidence implicate mitochondria in phenotypic variation: (a) rare mutations in mitochondrial proteins cause metabolic, neurological, and muscular disorders; (b) alterations in oxidative phosphorylation are characteristic of type 2 diabetes, Parkinson disease, Huntington disease, and other diseases; and (c) common missense variants in the mitochondrial genome (mtDNA) have been implic…	FALSE
S-EPMC3798993	Crystal structure of the prothrombinase complex from the venom of Pseudonaja textilis.	Pseudonaja textilis	The prothrombinase complex, composed of the protease factor (f)Xa and cofactor fVa, efficiently converts prothrombin to thrombin by specific sequential cleavage at 2 sites. How the complex assembles and its mechanism of prothrombin processing are of central importance to human health and disease, because insufficient thrombin generation is the root cause of hemophilia, and excessive thrombin prod…	FALSE
S-EPMC9743774	The mutational dynamics of short tandem repeats in large, multigenerational families.	Homo Sapiens	Background: Short tandem repeats (STRs) compose approximately 3% of the genome, and mutations at STR loci have been linked to dozens of human diseases including amyotrophic lateral sclerosis, Friedreich ataxia, Huntington disease, and fragile X syndrome. Improving our understanding of these mutations would increase our knowledge of the mutational dynamics of the genome and may uncover additional …	FALSE
S-EPMC10066375	Aging reduces calreticulin expression and alters spontaneous calcium signals in astrocytic endfeet of the mouse dorsolateral striatum.	NA	NA	FALSE
S-EPMC10041521	Fluorescent Activity-Based Probe To Image and Inhibit Factor XIa Activity in Human Plasma.	Homo Sapiens	Anticoagulation therapy is a mainstay of the treatment of thrombotic disorders; however, conventional anticoagulants trade antithrombotic benefits for bleeding risk. Factor (f) XI deficiency, known as hemophilia C, rarely causes spontaneous bleeding, suggesting that fXI plays a limited role in hemostasis. In contrast, individuals with congenital fXI deficiency display a reduced incidence of ische…	FALSE
S-EPMC5829048	Blood-brain barrier breakdown in Alzheimer disease and other neurodegenerative disorders.	Homo Sapiens	The blood-brain barrier (BBB) is a continuous endothelial membrane within brain microvessels that has sealed cell-to-cell contacts and is sheathed by mural vascular cells and perivascular astrocyte end-feet. The BBB protects neurons from factors present in the systemic circulation and maintains the highly regulated CNS internal milieu, which is required for proper synaptic and neuronal functionin…	FALSE
S-EPMC5561550	Peripubertal blood lead levels and growth among Russian boys.	Homo Sapiens	Background: Childhood blood lead levels (BLL) have been associated with growth impairment. Objectives: We assessed associations of peripubertal BLL with adolescent growth and near adult height in a longitudinal cohort of Russian boys. Methods: 481 boys were enrolled at ages 8-9years and followed annually to age 18. At enrollment, BLL was measured, and height, weight, and pubertal staging were obt…	FALSE
S-EPMC8981650	PA1 participates in the maintenance of blood-testis barrier integrity via cooperation with JUN in the Sertoli cells of mice.	Mus musculus	Background: The blood-testis barrier (BTB) is essential to the microenvironment of spermatogenesis, and Sertoli cells provide the cellular basis for BTB construction. Numerous nuclear transcription factors have been identified to be vital for the proper functioning of Sertoli cells. PA1 has been reported to play important roles during diverse biological processes, yet its potential function in ma…	FALSE
S-EPMC5526324	Maternal blood contamination of collected cord blood can be identified using DNA methylation at three CpGs.	Homo Sapiens	Cord blood is a commonly used tissue in environmental, genetic, and epigenetic population studies due to its ready availability and potential to inform on a sensitive period of human development. However, the introduction of maternal blood during labor or cross-contamination during sample collection may complicate downstream analyses. After discovering maternal contamination of cord blood in a co…	FALSE
S-EPMC1636828	DNA repair protein involved in heart and blood development.	Danio rerio	Apurinic/apyrimidinic endonuclease 1, a key enzyme in repairing abasic sites in DNA, is an embryonic lethal in mice. We are examining its role in embryogenesis in zebra fish. Zebra fish contain two genomic copies (zfAPEX1a and zfAPEX1b) with identical coding sequences. zfAPEX1b lacks introns. Recombinant protein (ZAP1) is highly homologous with and has the same enzymatic properties as its human o…	FALSE
MSV000084689	Cross-linking modifications of HDL apoproteins by oxidized phospholipids: Structural characterization, in vivo detection, and functional implications	Homo Sapiens (human)Mus Musculus (mouse)	Apolipoprotein A-I (apoA-I) is cross-linked and dysfunctional in human atheroma. Although multiple mechanisms of apoA-1 cross-linking have been demonstrated in vitro, the in vivo mechanisms of cross-linking are not well established. We have recently demonstrated the highly selective and efficient modification of high-density lipoprotein (HDL) apoproteins by endogenous oxidized phospholipids (oxPL…	FALSE
S-EPMC5850735	Serum omega-3 fatty acids and treatment outcomes among women undergoing assisted reproduction.	Homo Sapiens	STUDY QUESTION:Are serum polyunsaturated fatty acids (PUFA) concentrations, including omega-3 (ω3-PUFA) and omega-6 (ω6-PUFA), related to ART outcomes? SUMMARY ANSWER:Serum levels of long-chain ω3-PUFA were positively associated with probability of live birth among women undergoing ART. WHAT IS KNOWN ALREADY:Intake of ω3-PUFA improves oocyte and embryo quality in animal and human studies. However…	FALSE
S-EPMC4175394	Plasmodium falciparum transmission stages accumulate in the human bone marrow.	Homo Sapiens	Transmission of Plasmodium falciparum malaria parasites requires formation and development of gametocytes, yet all but the most mature of these sexual parasite forms are absent from the blood circulation. We performed a systematic organ survey in pediatric cases of fatal malaria to characterize the spatial dynamics of gametocyte development in the human host. Histological studies revealed a niche…	FALSE
PXD051407	Targeted MS validation of huntingtin protein interaction signatures in Huntington's disease mouse models	Mus musculus	Huntington’s disease (HD) is a debilitating progressive neurodegenerative disorder that has profound effects on an individual’s cognitive, motor, and behavioral functions. HD is caused by mutation in the huntingtin (HTT) gene that results in CAG repeat expansion and production of an aggregation-prone polyglutamine-containing protein (mHTT). The expression of mHTT causes selective degeneration, ma…	FALSE
S-EPMC4007519	Human exposure to nitro musks and the evaluation of their potential toxicity: an overview.	Homo Sapiens	Synthetic nitro musks are fragrant chemicals found in household and personal care products. The use of these products leads to direct exposures via dermal absorption, as well as inhalation of contaminated dust and volatilized fragrances. Evidence also suggests that humans are exposed to low doses of these chemicals through oral absorption of contaminated liquids and foods. As these compounds are …	FALSE
S-EPMC7946873	Data-driven curation process for describing the blood glucose management in the intensive care unit.	Homo Sapiens	Analysis of real-world glucose and insulin clinical data recorded in electronic medical records can provide insights into tailored approaches to clinical care, yet presents many analytic challenges. This work makes publicly available a dataset that contains the curated entries of blood glucose readings and administered insulin on a per-patient basis during ICU admissions in the Medical Informatio…	FALSE
S-EPMC5822408	Rapid loss of group 1 innate lymphoid cells during blood stage Plasmodium infection.	Homo Sapiens	Objectives: Innate lymphoid cells (ILCs) share many characteristics with CD4+ T cells, and group 1 ILCs share a requirement for T-bet and the ability to produce IFNγ with T helper 1 (Th1) cells. Given this similarity, and the importance of Th1 cells for protection against intracellular protozoan parasites, we aimed to characterise the role of group 1 ILCs during Plasmodium infection. Methods: We …	FALSE
S-EPMC5576211	Blood lead levels and neurodevelopmental function in perinatally HIV-exposed, uninfected children in a US-based longitudinal cohort study.	Homo Sapiens	Background: While children's exposure to environmental lead in the U.S. has decreased, areas of elevated levels remain. Because lead exposure is a risk factor for developmental delays, it should be considered when studying neurodevelopmental effects of in-utero antiretroviral medication (ARV) exposure in the growing population of perinatally HIV-exposed, uninfected children (PHEU). We compared bl…	FALSE
S-EPMC18676	Identification of phylogenetic footprints in primate tumor necrosis factor-alpha promoters.	NA	The human tumor necrosis factor-alpha (TNF-alpha) gene encodes a pleiotropic cytokine that plays a critical role in basic immunologic processes. To investigate the TNF-alpha regulatory region in the primate lineage, we isolated TNF-alpha promoters from representative great apes, Old World monkeys, and New World monkeys. We demonstrate that there is a nonuniform distribution of fixed human differe…	FALSE
S-EPMC2846941	RBC and WBC fatty acid composition following consumption of an omega 3 supplement: lessons for future clinical trials.	Homo Sapiens	Background: Results from increasing numbers of in vitro and in vivo studies have demonstrated that omega 3 fatty acids incorporated in cell culture media or in the diet of the animals can suppress the growth of cancers. When human clinical trials are initiated to determine the ability of omega 3 fatty acids to alter growth or response to chemotherapeutic interventions of cancers, it will be essen…	FALSE
S-EPMC3953952	Anti-citrullinated peptide autoantibodies, human leukocyte antigen shared epitope and risk of future rheumatoid arthritis: a nested case-control study.	Homo Sapiens	Introduction: The aim of this study was to characterize anti-citrullinated peptide antibody (ACPA) serostatus in pre-clinical rheumatoid arthritis (RA) with and without Human Leukocyte Antigen-Shared Epitope (HLA-SE) alleles. Methods: We identified 192 women in the Nurses' Health Study cohorts with blood samples obtained 4 months to 17 years prior to medical record-confirmed RA diagnosis. Three c…	FALSE
S-EPMC10509525	Study protocol of IMAGINE-HD: Imaging iron accumulation and neuroinflammation with 7T-MRI + CSF in Huntington's disease.	Homo Sapiens	Introduction: Strong evidence suggests a significant role for iron accumulation in the brain in addition to the well-documented neurodegenerative aspects of Huntington's disease (HD). The putative mechanisms by which iron is linked to the HD pathogenesis are multiple, including oxidative stress, ferroptosis and neuroinflammation. However, no previous study in a neurodegenerative disease has linke…	TRUE
S-EPMC6098021	Na/K-ATPase Y260 Phosphorylation-mediated Src Regulation in Control of Aerobic Glycolysis and Tumor Growth.	NA	NA	FALSE
S-EPMC7969998	Does Prenatal Exposure to CNS Stimulants Increase the Risk of Cardiovascular Disease in Adult Offspring?	Homo Sapiens	Prenatal exposure to an adverse uterine environment can have long lasting effects on adult offspring through DNA methylation, histone acetylation, and other epigenetic effects that alter gene expression and physiology. It is well-known that consumption of CNS stimulants such as caffeine, nicotine, amphetamines, and cocaine during pregnancy can adversely impact the offspring. However, most work in…	FALSE
S-EPMC1182430	Recombinant AAV2 transduction of primitive human hematopoietic stem cells capable of serial engraftment in immune-deficient mice.	Homo Sapiens	A recombinant AAV2 (rAAV2) vector encoding antisense RNA to HIV-1 transactivating region (TAR) was evaluated for transduction of human cord blood CD34+CD38- hematopoietic stem cells (HSC) capable of serial engraftment in nonobese diabetic (NOD)/severe combined immunodeficient (SCID) mice. Results revealed long-term multilineage marking in primary and secondary recipients, and significantly, an en…	FALSE
MSV000079100	A Rac/Cdc42 exchange factor complex promotes formation of lateral filopodia...	Homo Sapiens	3xFLAG-IPs from HEK293T cell lysates expressing 3xFLAG-bait or 3xFLAG-control. Trypsin Digestion	FALSE
S-EPMC7418728	Natural Killer cell activation, reduced ACE2, TMPRSS2, cytokines G-CSF, M-CSF and SARS-CoV-2-S pseudovirus infectivity by MEK inhibitor treatment of human cells.	Homo Sapiens	COVID-19 affects vulnerable populations including elderly individuals and patients with cancer. Natural Killer (NK) cells and innate-immune TRAIL suppress transformed and virally-infected cells. ACE2, and TMPRSS2 protease promote SARS-CoV-2 infectivity, while inflammatory cytokines IL-6, or G-CSF worsen COVID-19 severity. We show MEK inhibitors (MEKi) VS-6766, trametinib and selumetinib reduce AC…	FALSE
S-EPMC136554	Magnitude and frequency of cytotoxic T-lymphocyte responses: identification of immunodominant regions of human immunodeficiency virus type 1 subtype C.	HIV	A systematic analysis of immune responses on a population level is critical for a human immunodeficiency virus type 1 (HIV-1) vaccine design. Our studies in Botswana on (i) molecular analysis of the HIV-1 subtype C (HIV-1C) epidemic, (ii) frequencies of major histocompatibility complex class I HLA types, and (iii) cytotoxic T-lymphocyte (CTL) responses in the course of natural infection allowed u…	FALSE
PRJNA612723	DNA methylation profiles from a mouse model of Huntington's disease	Mus musculus	DNA methylation profiles from a mouse model of Huntington's disease	FALSE
S-EPMC5532064	Cardiotonic Steroids Stimulate Macrophage Inflammatory Responses Through a Pathway Involving CD36, TLR4, and Na/K-ATPase.	Homo Sapiens (human)Mus Musculus (mouse)	Objective: Circulating levels of cardiotonic steroids (CTS) are elevated in various chronic inflammatory conditions, but the role of CTS in inflammation remains largely unknown. We have previously shown that the CTS ouabain stimulates proinflammatory responses in murine macrophages. In this study, we aim to explore the mechanism how CTS induce proinflammatory responses in primary murine and human…	FALSE
S-EPMC6506781	Loss-of-Function in SMAD4 Might Not Be Critical for Human Natural Killer Cell Responsiveness to TGF-β.	Homo Sapiens	We characterized the NK cell phenotype and function in three family members with Hereditary Hemorrhagic Telangiectasia (HHT) due to heterozygous SMAD4 mutations. Loss-of-function mutation in this gene did not induce developmental effects to alter CD56bright or CD56dim NK cell subset proportions in peripheral blood; and did not result in major differences in either their IL-15-induced proliferatio…	FALSE
S-EPMC6454504	Age-Related Expression of Human AT1R Variants and Associated Renal Dysfunction in Transgenic Mice.	Homo Sapiens	Background: The contribution of single nucleotide polymorphisms in transcriptional regulation of the human angiotensin receptor type I (hAT1R) gene in age-related chronic pathologies such as hypertension and associated renal disorders is not well known. The hAT1R gene has single nucleotide polymorphisms in its promoter that forms 2 haplotypes (Hap), Hap-I and Hap-II. Hap-I of AT1R gene is associa…	FALSE
S-EPMC6284456	Dissociation between urate and blood pressure in mice and in people with early Parkinson's disease.	Mus musculus	Background: Epidemiological, laboratory and clinical studies have established an association between elevated urate and high blood pressure (BP). However, the inference of causality remains controversial. A naturally occurring antioxidant, urate may also be neuroprotective, and urate-elevating treatment with its precursor inosine is currently under clinical development as a potential disease-modi…	FALSE
S-EPMC3352992	Tag-free microfluidic separation of cells against multiple markers.	Homo Sapiens	Conventional cell separation against multiple markers generally requires the attachment of antibody tags, typically fluorescent or magnetic, to selected cell types in a heterogeneous suspension. This work describes how such separation can be accomplished in a series of microfluidic systems without the need for such tags. Two capture stages containing antibody-functionalized alginate hydrogels are…	FALSE
PRJNA612722	DNA methylation profiles from a transgenic sheep model of Huntington's disease	Ovis aries	DNA methylation profiles from a transgenic sheep model of Huntington's disease	FALSE
S-EPMC8412142	Lead Optimization of 3,5-Disubstituted-7-Azaindoles for the Treatment of Human African Trypanosomiasis.	NA	Neglected tropical diseases such as human African trypanosomiasis (HAT) are prevalent primarily in tropical climates and among populations living in poverty. Historically, the lack of economic incentive to develop new treatments for these diseases has meant that existing therapeutics have serious shortcomings in terms of safety, efficacy, and administration, and better therapeutics are needed. We…	FALSE
S-EPMC7250000	APOE4 leads to blood-brain barrier dysfunction predicting cognitive decline.	Homo Sapiens	Vascular contributions to dementia and Alzheimer's disease are increasingly recognized1-6. Recent studies have suggested that breakdown of the blood-brain barrier (BBB) is an early biomarker of human cognitive dysfunction7, including the early clinical stages of Alzheimer's disease5,8-10. The E4 variant of apolipoprotein E (APOE4), the main susceptibility gene for Alzheimer's disease11-14, leads …	FALSE
S-EPMC3971351	Pathprinting: An integrative approach to understand the functional basis of disease.	Homo Sapiens	New strategies to combat complex human disease require systems approaches to biology that integrate experiments from cell lines, primary tissues and model organisms. We have developed Pathprint, a functional approach that compares gene expression profiles in a set of pathways, networks and transcriptionally regulated targets. It can be applied universally to gene expression profiles across specie…	FALSE
S-EPMC3205478	Heart health when life is satisfying: evidence from the Whitehall II cohort study.	Homo Sapiens	Aims: Negative psychological states such as stress and depression are associated with increased risk of coronary heart disease (CHD), but it is unclear whether some positive states are protective. We investigated satisfaction with specific life domains as predictors of incident CHD. Methods and results: Coronary risk factors and satisfaction within seven life domains (e.g. job and family) were as…	FALSE
S-EPMC1563694	Genomic sites of human immunodeficiency virus type 2 (HIV-2) integration: similarities to HIV-1 in vitro and possible differences in vivo.	NA	Retroviruses have distinct preferences in integration site selection in the host cell genome during in vitro infection, with human immunodeficiency virus type 1 (HIV-1) integration strongly favoring transcriptional units. Additionally, studies with HIV-1 have shown that the genomic site of proviral integration may impact viral replication, with integration in heterochromatin associated with a blo…	FALSE
S-EPMC3850820	Protein analysis in human cerebrospinal fluid: Physiological aspects, current progress and future challenges.	Homo Sapiens	The introduction of lumbar puncture into clinical medicine over 100 years ago marks the beginning of the study of central nervous system diseases using the human cerebrospinal fluid (CSF). Ever since, CSF has been analyzed extensively to elucidate the physiological and biochemical bases of neurological disease. The proximity of CSF to the brain makes it a good target for studying the pathophysiol…	FALSE
S-EPMC8934682	The role of junctophilin proteins in cellular function.	NA	Junctophilins (JPHs) comprise a family of structural proteins that connect the plasma membrane to intracellular organelles such as the endo/sarcoplasmic reticulum (ER/SR). Tethering of these membrane structures results in the formation of highly organized subcellular junctions that play important signaling roles in all excitable cell types. There are four JPH isoforms, expressed primarily in musc…	FALSE
S-EPMC10174328	Contribution of adipocyte Na/K-ATPase α1/CD36 signaling induced exosome secretion in response to oxidized LDL.	Homo Sapiens	Introduction: Adipose tissue constantly secretes adipokines and extracellular vesicles including exosomes to crosstalk with distinct tissues and organs for whole-body homeostasis. However, dysfunctional adipose tissue under chronic inflammatory conditions such as obesity, atherosclerosis, and diabetes shows pro-inflammatory phenotypes accompanied by oxidative stress and abnormal secretion. Nevert…	FALSE
S-EPMC2949186	Glial dysfunction in abstinent methamphetamine abusers.	Homo Sapiens	Persistent neurochemical abnormalities in frontal brain structures are believed to result from methamphetamine use. We developed a localized (13)C magnetic resonance spectroscopy (MRS) assay on a conventional MR scanner, to quantify selectively glial metabolic flux rate in frontal brain of normal subjects and a cohort of recovering abstinent methamphetamine abusers. Steady-state bicarbonate conce…	FALSE
S-EPMC2656934	The genome of the simian and human malaria parasite Plasmodium knowlesi.	Plasmodium knowlesi	Plasmodium knowlesi is an intracellular malaria parasite whose natural vertebrate host is Macaca fascicularis (the 'kra' monkey); however, it is now increasingly recognized as a significant cause of human malaria, particularly in southeast Asia. Plasmodium knowlesi was the first malaria parasite species in which antigenic variation was demonstrated, and it has a close phylogenetic relationship to…	FALSE
PRJNA130645	Homo sapiens	Homo sapiens	Recurrent disruption of HIP1 identified in patients with epilepsy, learning difficulties, intellectual disability, and neurobehavioral abnormalities	FALSE
S-EPMC10896768	Effects of Electronic Cigarette Vaping on Cardiac and Vascular Function, and Post-myocardial Infarction Remodeling in Rats.	Rattus norvegicus	NA	FALSE
S-EPMC8671114	Race, geographical location and other risk factors for hypertension: South African National Health and Nutrition Examination Survey 2011/12.	Homo sapiens	Background: Hypertension is the leading cardiovascular disease in Africa. It is increasing in prevalence due partly to the epidemiological transition that African countries, including South Africa, are undergoing. This epidemiological transition is characterised by a nutrition transition andurbanisation; resulting in behavioural, environmental and stress changes that are subject to racial and geo…	FALSE
S-EPMC11220145	Somatic CAG repeat instability in intermediate alleles of the HTT gene and its potential association with a clinical phenotype.	NA	NA	FALSE
S-EPMC8785538	Spatiotemporal distribution, abundance, and host interactions of two invasive vectors of arboviruses, Aedes albopictus and Aedes japonicus, in Pennsylvania, USA.	Aedes albopictus and Aedes japonicus	Background: Aedes albopictus and Aedes japonicus, two invasive mosquito species in the United States, are implicated in the transmission of arboviruses. Studies have shown interactions of these two mosquito species with a variety of vertebrate hosts; however, regional differences exist and may influence their contribution to arbovirus transmission. Methods: We investigated the distribution, abund…	FALSE
S-EPMC7167334	Cord blood DNA methylation of DNMT3A mediates the association between in utero arsenic exposure and birth outcomes: Results from a prospective birth cohort in Bangladesh.	Homo sapiens	Background: Fetal epigenetic programming plays a critical role in development. DNA methyltransferase 3 alpha (DNMT3A), which is involved in de novo DNA methylation (DNAm), is a prime candidate gene as a mediator between prenatal exposures and birth outcomes. We evaluated the relationships between in utero arsenic (As) exposure, birth outcomes, and DNMT3A DNAm. Methods: In a prospective Bangladesh…	FALSE
S-EPMC3656385	Development of a Chip/Chip/SRM platform using digital chip isoelectric focusing and LC-Chip mass spectrometry for enrichment and quantitation of low abundance protein biomarkers in human plasma.	Homo sapiens	Protein biomarkers are critical for diagnosis, prognosis, and treatment of disease. The transition from protein biomarker discovery to verification can be a rate limiting step in clinical development of new diagnostics. Liquid chromatography-selected reaction monitoring mass spectrometry (LC-SRM MS) is becoming an important tool for biomarker verification studies in highly complex biological samp…	FALSE
PRJNA290626	Homo sapiens	Homo sapiens	The effect of statins on blood gene expression in COPD	FALSE
S-EPMC2987415	Dietary anaplerotic therapy improves peripheral tissue energy metabolism in patients with Huntington's disease.	Homo sapiens	We previously identified a systemic metabolic defect associated with early weight loss in patients with Huntington's disease (HD), suggesting a lack of substrates for the Krebs cycle. Dietary anaplerotic therapy with triheptanoin is used in clinical trials to promote energy production in patients with peripheral and brain Krebs cycle deficit, as its metabolites - C5 ketone bodies - cross the bloo…	FALSE
S-EPMC10036494	Highly-sensitive label-free deep profiling of N-glycans released from biomedically-relevant samples.	NA	NA	FALSE
S-EPMC6314084	Actinobaculum massiliense Proteome Profiled in Polymicrobial Urethral Catheter Biofilms.	Actinobaculum massiliense	Actinobaculum massiliense, a Gram-positive anaerobic coccoid rod colonizing the human urinary tract, belongs to the taxonomic class of Actinobacteria. We identified A. massiliense as a cohabitant of urethral catheter biofilms (CB). The CBs also harbored more common uropathogens, such as Proteus mirabilis and Aerococcus urinae, supporting the notion that A. massiliense is adapted to a life style i…	FALSE
S-EPMC3979039	Altered expression of protein tyrosine phosphatase, non-receptor type 22 isoforms in systemic lupus erythematosus.	Homo sapiens	A C-to-T single nucleotide polymorphism (SNP) located at position 1858 of human protein tyrosine phosphatase, non-receptor type 22 (PTPN22) complementary DNA (cDNA) is associated with an increased risk of systemic lupus erythematosus (SLE). How the overall activity of PTPN22 is regulated and how the expression of PTPN22 differs between healthy individuals and patients with lupus are poorly unders…	FALSE
S-EPMC3687518	Malaria-infected erythrocyte-derived microvesicles mediate cellular communication within the parasite population and with the host immune system.	NA	Humans and mice infected with different Plasmodium strains are known to produce microvesicles derived from the infected red blood cells (RBCs), denoted RMVs. Studies in mice have shown that RMVs are elevated during infection and have proinflammatory activity. Here we present a detailed characterization of RMV composition and function in the human malaria parasite Plasmodium falciparum. Proteomics…	FALSE
S-EPMC10369801	Three dimensional evaluation of cerebrovascular density and branching in chronic traumatic encephalopathy.	Homo sapiens	Chronic traumatic encephalopathy (CTE) is a neurodegenerative disease associated with exposure to repetitive head impacts (RHI) and characterized by perivascular accumulations of hyperphosphorylated tau protein (p-tau) at the depths of the cortical sulci. Studies of living athletes exposed to RHI, including concussive and nonconcussive impacts, have shown increased blood-brain barrier permeabilit…	FALSE
S-EPMC11775147	Cognitive reserve is associated with education, social determinants, and cognitive outcomes among older American Indians in the Strong Heart Study.	NA	NA	FALSE
S-EPMC2932764	MicroRNAs as effectors of brain function with roles in ischemia and injury, neuroprotection, and neurodegeneration.	Homo sapiens	MicroRNAs are small RNAs that function as regulators of posttranscriptional gene expression. MicroRNAs are encoded by genes, and processed to form ribonucleoprotein complexes that bind to messenger RNA (mRNA) targets to repress translation or degrade mRNA transcripts. The microRNAs are particularly abundant in the brain where they serve as effectors of neuronal development and maintenance of the …	FALSE
S-EPMC8791584	Vesicular trafficking is a key determinant of the statin response in acute myeloid leukemia.	Homo sapiens	Cholesterol homeostasis has been proposed as one mechanism contributing to chemoresistance in AML and hence, inclusion of statins in therapeutic regimens as part of clinical trials in AML has shown encouraging results. Chemical screening of primary human AML specimens by our group led to the identification of lipophilic statins as potent inhibitors of AMLs from a wide range of cytogenetic groups.…	FALSE
S-EPMC11385583	Genome-wide association study meta-analysis of neurofilament light (NfL) levels in blood reveals novel loci related to neurodegeneration.	NA	NA	FALSE
S-EPMC5711624	Near infrared spectroscopy for measuring changes in bone hemoglobin content after exercise in individuals with spinal cord injury.	Homo sapiens	Bone blood perfusion has an essential role in maintaining a healthy bone. However, current methods for measuring bone blood perfusion are expensive and highly invasive. This study presents a custom built near-infrared spectroscopy (NIRS) instrument to measure changes in bone blood perfusion. We demonstrated the efficacy of this device by monitoring oxygenated and deoxygenated hemoglobin changes i…	FALSE
S-EPMC3951744	Lead exposure and rate of change in cognitive function in older women.	Homo sapiens	Higher long-term cumulative lead exposure predicts faster cognitive decline in older men, but evidence of an association in women is lacking.To determine if there is an association between lead exposure and cognitive decline in women.This study considers a sample of 584 women from the Nurses' Health Study who live in or near Boston, Massachusetts. We quantified lead exposure using biomarkers of l…	FALSE
S-EPMC8726715	Modulating FKBP5/FKBP51 and autophagy lowers HTT (huntingtin) levels.	Homo Sapiens (human)Mus Musculus (mouse)	Current disease-modifying therapies for Huntington disease (HD) focus on lowering mutant HTT (huntingtin; mHTT) levels, and the immunosuppressant drug rapamycin is an intriguing therapeutic for aging and neurological disorders. Rapamycin interacts with FKBP1A/FKBP12 and FKBP5/FKBP51, inhibiting the MTORC1 complex and increasing cellular clearance mechanisms. Whether the levels of FKBP (FK506 bind…	FALSE
S-EPMC5310119	SMAD transcription factors are altered in cell models of HD and regulate HTT expression.	NA	Transcriptional dysregulation is observable in multiple animal and cell models of Huntington's disease, as well as in human blood and post-mortem caudate. This contributes to HD pathogenesis, although the exact mechanism by which this occurs is unknown. We therefore utilised a dynamic model in order to determine the differential effect of growth factor stimulation on gene expression, to highlight…	FALSE
S-EPMC8238482	BCL-XL antagonism selectively reduces neutrophil life span within inflamed tissues without causing neutropenia.	Mus musculus	Neutrophils help to clear pathogens and cellular debris, but can also cause collateral damage within inflamed tissues. Prolonged neutrophil residency within an inflammatory niche can exacerbate tissue pathology. Using both genetic and pharmacological approaches, we show that BCL-XL is required for the persistence of neutrophils within inflammatory sites in mice. We demonstrate that a selective BC…	FALSE
S-EPMC9179936	Platelet-mimicking procoagulant nanoparticles augment hemostasis in animal models of bleeding.	NA	NA	FALSE
MSV000084607	A Multi-Omics Interpretable Machine Learning Model Reveals Modes of Action of Small Molecules	Mus musculus	Cells expressing mutant huntingtin were treated in triplicate with serum-free DMEM with vehicle (Q111SST) or serum-free DMEM with one of 4 protective compounds (Cyproheptadine, Loxapine, Diacylglycerol Kinase Inhibitor II, Meclizine) for 24 hours. Wild type cells were also treated with serum-free DMEM with vehicle (Q7SST) as an additional control for 24 hours. We examined the compounds' proteomic…	FALSE
S-EPMC10141503	Umbilical cord DNA methylation is associated with body mass index trajectories from birth to adolescence.	Homo sapiens	Background: DNA methylation (DNAm) in cord blood has been associated with various prenatal factors and birth outcomes. This study sought to fill an important knowledge gap: the link of cord DNAm with child postnatal growth trajectories from birth to age 18 years (y). Methods: Using data from a US predominantly urban, low-income, multi-ethnic birth cohort (N = 831), we first applied non-parametric…	FALSE
S-EPMC2829370	Population genetic analysis of large sequence polymorphisms in Plasmodium falciparum blood-stage antigens.	Plasmodium falciparum	Plasmodium falciparum, the causative agent of human malaria, invades host erythrocytes using several proteins on the surface of the invasive merozoite, which have been proposed as potential vaccine candidates. Members of the multi-gene PfRh family are surface antigens that have been shown to play a central role in directing merozoites to alternative erythrocyte receptors for invasion. Recently, w…	FALSE
S-EPMC4516141	Directional dominance on stature and cognition in diverse human populations.	Homo sapiens	Homozygosity has long been associated with rare, often devastating, Mendelian disorders, and Darwin was one of the first to recognize that inbreeding reduces evolutionary fitness. However, the effect of the more distant parental relatedness that is common in modern human populations is less well understood. Genomic data now allow us to investigate the effects of homozygosity on traits of public h…	FALSE
S-EPMC7679035	MEK inhibitors reduce cellular expression of ACE2, pERK, pRb while stimulating NK-mediated cytotoxicity and attenuating inflammatory cytokines relevant to SARS-CoV-2 infection.	Homo sapiens	COVID-19 affects vulnerable populations including elderly individuals and patients with cancer. Natural Killer (NK) cells and innate-immune TRAIL suppress transformed and virally-infected cells. ACE2, and TMPRSS2 protease promote SARS-CoV-2 infectivity, while inflammatory cytokines IL-6, or G-CSF worsen COVID-19 severity. We show MEK inhibitors (MEKi) VS-6766, trametinib and selumetinib reduce AC…	FALSE
S-EPMC9623595	Meta-analysis of epigenome-wide association studies in newborns and children show widespread sex differences in blood DNA methylation.	Homo sapiens	Background: Among children, sex-specific differences in disease prevalence, age of onset, and susceptibility have been observed in health conditions including asthma, immune response, metabolic health, some pediatric and adult cancers, and psychiatric disorders. Epigenetic modifications such as DNA methylation may play a role in the sexual differences observed in diseases and other physiological …	FALSE
S-EPMC6650348	The Role of Pharmacy Refill Measures in Assessing Adherence and Predicting HIV Disease Markers in Youth with Perinatally-Acquired HIV (PHIV).	Homo sapiens	Antiretroviral (ARV) adherence is critical in monitoring disease response in youth with perinatally-acquired HIV (PHIV). We used pharmacy refill (PR) information for PHIV youth from the PHACS Memory Sub-study to calculate medication availability over 2, 4, and 6 months. PR, a proxy of adherence, was compared with self-reported 7-day adherence in predicting suppressed viral load (SVL?	FALSE
S-EPMC2168398	Plasmodium falciparum Sir2: an unusual sirtuin with dual histone deacetylase and ADP-ribosyltransferase activity.	Plasmodium falciparum	In the human malaria parasite Plasmodium falciparum, a member of the sirtuin family has been implicated in the epigenetic regulation of virulence genes that are vital to malaria pathogenesis and persistence. This eukaryotic sirtuin, PfSir2, is divergent in sequence from those characterized thus far and belongs to the phylogenetic class that contains primarily eubacterial and archaeal sirtuins. Pf…	FALSE
S-EPMC5090125	Epigenetic DNA Methylation Profiling with MSRE: A Quantitative NGS Approach Using a Parkinson's Disease Test Case.	Homo sapiens	Epigenetics is a rapidly developing field focused on deciphering chemical fingerprints that accumulate on human genomes over time. As the nascent idea of precision medicine expands to encompass epigenetic signatures of diagnostic and prognostic relevance, there is a need for methodologies that provide high-throughput DNA methylation profiling measurements. Here we report a novel quantification me…	FALSE
S-EPMC3640834	Early life predictors of atrial fibrillation-related mortality: evidence from the health and retirement study.	Homo sapiens	Prior research found that Americans born in 6 southeastern states (the AF-risk zone) had elevated risk of AF-related mortality, but no mechanisms were identified. We hypothesized the association between AF-related mortality and AF-risk zone birth is explained by indicators of childhood social disadvantage or adult risk factors. In 24,323 participants in the US Health and Retirement Study, we foun…	FALSE
phs000007.v17.p6	Framingham Cohort	Homo sapiens	Startup of Framingham Heart Study. Cardiovascular disease (CVD) is the leading cause of death and serious illness in the United States. In 1948, the Framingham Heart Study (FHS) -- under the direction of the National Heart Institute (now known as the National Heart, Lung, and Blood Institute, NHLBI) -- embarked on a novel and ambitious project in health research. At the time, little was known abo…	FALSE
S-EPMC8623192	Effects of Different Allotments of Avocados on the Nutritional Status of Families: A Cluster Randomized Controlled Trial.	Homo sapiens	Avocados are a nutrient-dense plant-food, but limited trial-derived evidence exists about the effects of avocado intake on family nutritional status. We investigated the impact of two levels of avocado allotment, plus a standard nutrition education intervention on the nutritional status of Hispanic/Latino families. Seventy-two families consisting of at least three members of ≥5 years of age and r…	FALSE
S-EPMC3700827	A panel study of occupational exposure to fine particulate matter and changes in DNA methylation over a single workday and years worked in boilermaker welders.	Homo sapiens	Background: Exposure to pollutants including metals and particulate air pollution can alter DNA methylation. Yet little is known about intra-individual changes in DNA methylation over time in relationship to environmental exposures. Therefore, we evaluated the effects of acute- and chronic metal-rich PM2.5 exposures on DNA methylation. Methods: Thirty-eight male boilermaker welders participated i…	FALSE
S-EPMC5121507	Rapamycin Attenuates Cardiac Fibrosis in Experimental Uremic Cardiomyopathy by Reducing Marinobufagenin Levels and Inhibiting Downstream Pro-Fibrotic Signaling.	Homo sapiens	Experimental uremic cardiomyopathy causes cardiac fibrosis and is causally related to the increased circulating levels of the cardiotonic steroid, marinobufagenin (MBG), which signals through Na/K-ATPase. Rapamycin is an inhibitor of the serine/threonine kinase mammalian target of rapamycin (mTOR) implicated in the progression of many different forms of renal disease. Given that Na/K-ATPase signa…	FALSE
S-EPMC6927478	Undetectable gadolinium brain retention in individuals with an age-dependent blood-brain barrier breakdown in the hippocampus and mild cognitive impairment.	Homo sapiens	Introduction: Blood-brain barrier (BBB) breakdown is an early independent biomarker of human cognitive dysfunction, as found using gadolinium (Gd) as a contrast agent. Whether Gd accumulates in brains of individuals with an age-dependent BBB breakdown and/or mild cognitive impairment remains unclear. Methods: We analyzed T1-weighted magnetic resonance imaging (MRI) scans from 52 older participant…	FALSE
S-EPMC9793579	Implicating genes, pleiotropy, and sexual dimorphism at blood lipid loci through multi-ancestry meta-analysis.	Homo sapiens	NA	FALSE
PXD065892	Diagnostics of autoimmune hepatitis enabled by non-invasive clinical proteomics	Homo sapiens	Autoimmune hepatitis (AIH) can be challenging to distinguish from other chronic liver diseases such as metabolic dysfunction-associated steatotic liver disease (MASLD). We applied advanced proteomic analysis to paired liver and plasma samples from newly diagnosed AIH patients, MASLD patients, and healthy controls to uncover disease-specific pathways and biomarkers. We quantified 7632 liver and 55…	FALSE
S-EPMC7408149	Changes in Metabolites During an Oral Glucose Tolerance Test in Early and Mid-Pregnancy: Findings from the PEARLS Randomized, Controlled Lifestyle Trial.	Homo sapiens	The oral glucose tolerance test (OGTT) is used to diagnose gestational and other types of diabetes. We examined metabolite changes during an OGTT, and how a comprehensive diet and physical activity intervention may influence these changes in a population of overweight/obese Hispanic pregnant women. Integration of changes in metabolites during an OGTT may help us gain preliminary insights into how…	FALSE
S-EPMC3276110	Diversity-Oriented Synthesis Yields a Novel Lead for the Treatment of Malaria.	Homo sapiens	Here, we describe the discovery of a novel antimalarial agent using phenotypic screening of Plasmodium falciparum asexual blood-stage parasites. Screening a novel compound collection created using diversity-oriented synthesis (DOS) led to the initial hit. Structure-activity relationships guided the synthesis of compounds having improved potency and water solubility, yielding a subnanomolar inhibi…	FALSE
S-EPMC3155522	Brain-derived neurotrophic factor in patients with Huntington's disease.	Homo sapiens	Reduced Brain-Derived Neurotrophic Factor (BDNF) levels have been described in a number of patho-physiological conditions, most notably, in Huntington's disease (HD), a progressive neurodegenerative disorder. Since BDNF is also produced in blood, we have undertaken the measurement of its peripheral levels in the attempt to identify a possible link with HD prognosis and/or its progression. Here we…	TRUE
S-EPMC5553685	Agonists of epoxyeicosatrienoic acids reduce infarct size and ameliorate cardiac dysfunction via activation of HO-1 and Wnt1 canonical pathway.	Homo sapiens	Myocardial infarction (MI) is complicated by ventricular fibrosis and associated diastolic and systolic failure. Emerging studies implicate Wnt1 signaling in the formation of new blood vessels. Epoxyeicosatrienoic acids (EETs)-mediated up-regulation of heme oxygenase-1 (HO-1) protects against the detrimental consequences of MI in several animal models, however, the mechanism(s) by which this occu…	FALSE
S-EPMC2636996	Febrile temperature leads to significant stiffening of Plasmodium falciparum parasitized erythrocytes.	Homo sapiens	Parasitic infection with Plasmodium falciparum is responsible for the most severe form of human malaria in which patients suffer from periodic fever. It is well established that during intra-erythrocytic maturation of the parasite in the red blood cell (RBC), the RBC becomes significantly more cytoadhesive and less deformable; these and other biochemical factors together with human host factors s…	FALSE
S-EPMC7961126	Pulmonary fate and consequences of transferrin-functionalized gold nanoparticles.	Homo sapiens	NA	FALSE
S-EPMC6173610	High school cigarette smoking and post-secondary education enrollment: Longitudinal findings from the NEXT Generation Health Study.	Homo sapiens	The inverse association between smoking and educational attainment has been reported in cross-sectional studies. Temporality between smoking and education remains unclear. Our study examines the prospective association between high school cigarette and smoking post-secondary education enrollment. Data were collected from a nationally representative cohort of 10th graders who participated in the N…	FALSE
S-EPMC11697022	Functional large-conductance calcium and voltage-gated potassium channels in extracellular vesicles act as gatekeepers of structural and functional integrity.	NA	NA	FALSE
S-EPMC9434700	Design, Synthesis, and Characterization of [18F]mG2P026 as a High-Contrast PET Imaging Ligand for Metabotropic Glutamate Receptor 2.	NA	NA	FALSE
S-EPMC5025259	Glycogen Synthase Kinase 3β Promotes the Endocytosis of Transferrin in the African Trypanosome.	NA	Human parasite Trypanosoma brucei proliferates in the blood of its host, where it takes up iron via receptor-mediated endocytosis of transferrin (Tf). Mechanisms of Tf endocytosis in the trypanosome are not fully understood. Small molecule lapatinib inhibits Tf endocytosis in T. brucei and associates with protein kinase GSK3β (TbGSK3β). Therefore, we hypothesized that Tf endocytosis may be regula…	FALSE
S-EPMC6345504	CD36 Enhances Vascular Smooth Muscle Cell Proliferation and Development of Neointimal Hyperplasia.	Homo sapiens	Objective- Dysregulated proliferation of vascular smooth muscle cells (VSMC) plays an essential role in neointimal hyperplasia. CD36 functions critically in atherogenesis and thrombosis. We hypothesize that CD36 regulates VSMC proliferation and contributes to the development of obstructive vascular diseases. Approach and Results- We found by immunofluorescent staining that CD36 was highly express…	FALSE
S-EPMC6451770	Does pregnancy complication history improve cardiovascular disease risk prediction? Findings from the HUNT study in Norway.	Homo sapiens	Aim: To evaluate whether history of pregnancy complications [pre-eclampsia, gestational hypertension, preterm delivery, or small for gestational age (SGA)] improves risk prediction for cardiovascular disease (CVD). Methods and results: This population-based, prospective cohort study linked data from the HUNT Study, Medical Birth Registry of Norway, validated hospital records, and Norwegian Cause …	FALSE
S-EPMC6913883	Longitudinal associations of neighborhood socioeconomic status with cardiovascular risk factors: A 46-year follow-up study.	Homo sapiens	Objectives: Neighborhood characteristics are increasingly recognized as important determinants of cardiovascular disease (CVD) risk. However, longitudinal studies on the health impacts of neighborhood characteristics are rare. We sought to investigate whether neighborhood socioeconomic status (NSES) during birth, childhood and adulthood is associated with CVD risk factors in adulthood. Methods: U…	FALSE
S-EPMC4230994	CYP2J2 targeting to endothelial cells attenuates adiposity and vascular dysfunction in mice fed a high-fat diet by reprogramming adipocyte phenotype.	Mus musculus	Obesity is a global epidemic and a common risk factor for endothelial dysfunction and the subsequent development of diabetes mellitus and vascular diseases such as hypertension. Epoxyeicosatrienoic acids (EETs) are cytochrome P450 (CYP)-derived metabolites of arachidonic acid that contribute to vascular protection by stimulating vasodilation and inhibiting inflammation. Heme oxygenase-1 is a stre…	FALSE
S-EPMC3218844	A global transcriptional analysis of Plasmodium falciparum malaria reveals a novel family of telomere-associated lncRNAs.	Homo sapiens	Mounting evidence suggests a major role for epigenetic feedback in Plasmodium falciparum transcriptional regulation. Long non-coding RNAs (lncRNAs) have recently emerged as a new paradigm in epigenetic remodeling. We therefore set out to investigate putative roles for lncRNAs in P. falciparum transcriptional regulation.We used a high-resolution DNA tiling microarray to survey transcriptional acti…	FALSE
S-EPMC5789891	Gimap5-dependent inactivation of GSK3β is required for CD4+ T cell homeostasis and prevention of immune pathology.	Homo sapiens	NA	FALSE
S-EPMC9236625	Perceived effectiveness of added-sugar warning label designs for U.S. restaurant menus: An online randomized controlled trial.	Homo sapiens	Added-sugar consumption in the U.S. exceeds recommended limits. Policymakers are considering requiring restaurants to use menu warning labels to indicate items high in added sugar. We sought to determine whether icon-only and icon-plus-text added-sugar menu labels were (1) perceived as more effective at potentially reducing consumption of items high in added sugar and (2) increased knowledge of m…	FALSE
S-EPMC10333277	Genome-wide association analysis and Mendelian randomization proteomics identify drug targets for heart failure.	Homo sapiens	NA	FALSE
PRJNA96487	Homo sapiens	Homo sapiens	PGC1alpha overexpression in human white adipose cells	FALSE
MSV000082569	Extended multiplexing of TMT labeling reveals age and high fat diet specific proteome changes in mouse epididymal adipose tissue	Mus musculus	Age-related and/or high caloric intake driven changes in visceral adipose tissue contribute to the development of diabetes and cardiovascular disease. The lack of reliable, high-throughput methods to analyze the adipose tissue protein composition has limited our understanding of the protein networks responsible for metabolic regulation of various adipose depots. We have developed a proteomic appr…	FALSE
S-EPMC7798340	Circular RNAs in body fluids as cancer biomarkers: the new frontier of liquid biopsies.	Homo sapiens	Cancer is a leading cause of death worldwide, particularly because of its high mortality rate in patients who are diagnosed at late stages. Conventional biomarkers originating from blood are widely used for cancer diagnosis, but their low sensitivity and specificity limit their widespread application in cancer screening among the general population. Currently, emerging studies are exploiting nove…	FALSE
S-EPMC3484648	Discovery and fine mapping of serum protein loci through transethnic meta-analysis.	Homo sapiens	Many disorders are associated with altered serum protein concentrations, including malnutrition, cancer, and cardiovascular, kidney, and inflammatory diseases. Although these protein concentrations are highly heritable, relatively little is known about their underlying genetic determinants. Through transethnic meta-analysis of European-ancestry and Japanese genome-wide association studies, we ide…	FALSE
S-EPMC4309995	In utero arsenic exposure and fetal immune repertoire in a US pregnancy cohort.	Homo sapiens	Arsenic has wide-ranging effects on human health and there is evidence that it alters the immune response by influencing CD4+/CD8+ T cell ratios, IL-2 cytokine levels, and the expression of immune-response genes. We investigated the impact of in utero environmental arsenic exposure on immune development and function in newborns participating in a pregnancy cohort in New Hampshire, U.S., where ars…	FALSE
S-EPMC3101419	Aminoindoles, a novel scaffold with potent activity against Plasmodium falciparum.	NA	This study characterizes aminoindole molecules that are analogs of Genz-644442. Genz-644442 was identified as a hit in a screen of ~70,000 compounds in the Broad Institute's small-molecule library and the ICCB-L compound collection at Harvard Medical School. Genz-644442 is a potent inhibitor of Plasmodium falciparum in vitro (50% inhibitory concentrations [IC??s], 200 to 285 nM) and inhibits P. b…	FALSE
S-EPMC9388392	A multi-layer functional genomic analysis to understand noncoding genetic variation in lipids.	Homo sapiens	A major challenge of genome-wide association studies (GWASs) is to translate phenotypic associations into biological insights. Here, we integrate a large GWAS on blood lipids involving 1.6 million individuals from five ancestries with a wide array of functional genomic datasets to discover regulatory mechanisms underlying lipid associations. We first prioritize lipid-associated genes with express…	FALSE
S-EPMC3607468	Integration of genome-wide association studies with biological knowledge identifies six novel genes related to kidney function.	Homo sapiens	In conducting genome-wide association studies (GWAS), analytical approaches leveraging biological information may further understanding of the pathophysiology of clinical traits. To discover novel associations with estimated glomerular filtration rate (eGFR), a measure of kidney function, we developed a strategy for integrating prior biological knowledge into the existing GWAS data for eGFR from …	FALSE
S-EPMC7048086	The landscape of cardiovascular care in pediatric cancer patients and survivors: a survey by the ACC Pediatric Cardio-Oncology Work Group.	Homo sapiens	Objective: To enhance the understanding of cardiovascular care delivery in childhood cancer patients and survivors. Study design: A 20-question survey was created by the Pediatric Cardio-oncology Work Group of the American College of Cardiology (ACC) Cardio-oncology Section to assess the care, management, and surveillance tools utilized to manage pediatric/young adult cardio-oncology patients. Th…	FALSE
S-EPMC5745211	The Oxygen Paradox, the French Paradox, and age-related diseases.	Homo sapiens	A paradox is a seemingly absurd or impossible concept, proposition, or theory that is often difficult to understand or explain, sometimes apparently self-contradictory, and yet ultimately correct or true. How is it possible, for example, that oxygen "a toxic environmental poison" could be also indispensable for life (Beckman and Ames Physiol Rev 78(2):547-81, 1998; Stadtman and Berlett Chem Res T…	FALSE
S-EPMC4165626	Global, regional, and national levels of neonatal, infant, and under-5 mortality during 1990-2013: a systematic analysis for the Global Burden of Disease Study 2013.	Homo sapiens	Background: Remarkable financial and political efforts have been focused on the reduction of child mortality during the past few decades. Timely measurements of levels and trends in under-5 mortality are important to assess progress towards the Millennium Development Goal 4 (MDG 4) target of reduction of child mortality by two thirds from 1990 to 2015, and to identify models of success. Methods: …	FALSE
S-EPMC7614570	Global burden of chronic respiratory diseases and risk factors, 1990-2019: an update from the Global Burden of Disease Study 2019.	Homo sapiens	NA	FALSE
S-EPMC8719276	Cancer Incidence, Mortality, Years of Life Lost, Years Lived With Disability, and Disability-Adjusted Life Years for 29 Cancer Groups From 2010 to 2019: A Systematic Analysis for the Global Burden of Disease Study 2019.	Homo sapiens	Importance: The Global Burden of Diseases, Injuries, and Risk Factors Study 2019 (GBD 2019) provided systematic estimates of incidence, morbidity, and mortality to inform local and international efforts toward reducing cancer burden. Objective: To estimate cancer burden and trends globally for 204 countries and territories and by Sociodemographic Index (SDI) quintiles from 2010 to 2019. Evidence …	FALSE
S-EPMC7615984	Global Burden of Cardiovascular Diseases and Risks, 1990-2022.	Homo sapiens	NA	FALSE
S-EPMC11447278	Forecasting the effects of smoking prevalence scenarios on years of life lost and life expectancy from 2022 to 2050: a systematic analysis for the Global Burden of Disease Study 2021.	Homo sapiens	NA	FALSE

## Sheet: OmicsDIWebFilter
Id	Name	Organism	Description	Validation
PXD065892	Diagnostics of autoimmune hepatitis enabled by non-invasive clinical proteomics	Homo Sapiens	Autoimmune hepatitis (AIH) can be challenging to distinguish from other chronic liver diseases such as metabolic dysfunction-associated steatotic liver disease (MASLD). We applied advanced proteomic analysis to paired liver and plasma samples from newly diagnosed AIH patients, MASLD patients, and healthy controls to uncover disease-specific pathways and biomarkers. We quantified 7632 liver and 55…	FALSE
