# Supplementary material for: FAIRness assessment of the metadata of omics datasets in online repositories
Source: Research Square preprint supplement (doi:10.21203/rs.3.rs-7820760/v1), 2025-11-05
Supplement: Supplementary file 5 [file ba56cec9a49522d8a964975e.xlsx]

## Sheet: Description
This is a supplementary file to the manuscript titled 'FAIRness assessment of the metadata of omics datasets in online repositories'
This file contains results of API searches on the chosen repositories. Repositories that did not yield any results are not included here. The column names are based on all the relevant fields returned in the API calls.
Name of tab	Description
ArrayExpressAPIFreeText	Results of the API calls to the repository ArrayExpress with the search terms entered as free text to be searched on all possible fields
ArrayExpressAPIFilter	Results of the API calls to the repository ArrayExpress with filters used for search terms where possible and the other terms entered as free text to be searched on all possible fields. Filtered for "Organism"
DbGaPAPIFreeText	Results of the API calls to the repository DbGaP with the search terms entered as free text to be searched on all possible fields.
DbGaPAPIFilter	Results of the API calls to the repository DbGaP with filters used for search terms where possible and the other terms entered as free text to be searched on all possible fields. Filtered for "Disease"
GEOAPIFreeText	Results of the API calls to the repository GEO with the search terms entered as free text to be searched on all possible fields.
GEOAPIFilter	Results of the API calls to the repository GEO with filters used for search terms where possible and the other terms entered as free text to be searched on all possible fields. Filtered for "Organism"
MetabolomicsWorkbenchAPIFreetex	Results of the API calls to the repository Metabolomics Workbench with the search terms entered as free text to be searched on the title.

## Sheet: ArrayExpressAPIFreeText
Repo	Id	Name	Description	Validation
ArrayExpress	E-GEOD-1751	Human blood expression for Huntington's disease versus control	E-GEOD-1751 Human blood expression for Huntington's disease versus control transcription profiling by array EFO EFO_0002768 Homo sapiens Affymetrix U133A expression levels for 12 symptomatic and 5 presymptomatic Huntington's disease patients versus 14 healthy controls. Keywords: other P-GSE1751-1	TRUE
ArrayExpress	E-GEOD-24250	The transcriptional modulator H2AFY marks Huntington's disease activity in men and mice	E-GEOD-24250 The transcriptional modulator H2AFY marks Huntington's disease activity in men and mice transcription profiling by array EFO EFO_0002768 Homo sapiens To accelerate the development of disease-modifying therapeutics for Huntingtonâ€™s disease (HD), a dynamic biomarker of disease activity	FALSE
ArrayExpress	E-GEOD-54670	Illumina Infinium HumanMethylation450 data for human whole blood samples and for mixtures of purified white blood cells reconstructing human blood	E-GEOD-54670 Illumina Infinium HumanMethylation450 data for human whole blood samples and for mixtures of purified white blood cells reconstructing human blood methylation profiling by array EFO EFO_0002759 Homo sapiens The objective of the study was to utilize DNA methylation to quantify human	FALSE
ArrayExpress	E-MTAB-14696	RNA-seq Analysis in Huntington's disease (HD) peripheral blood mononuclear cell samples	E-MTAB-14696 RNA-seq Analysis in Huntington's disease (HD) peripheral blood mononuclear cell samples RNA-seq of coding RNA EFO EFO_0003738 Homo sapiens Huntington's disease (HD) is an autosomal dominant neurodegenerative disease caused by the expansion of the CAG nucleotide repeat in the first exon	TRUE
ArrayExpress	S-EPMC3193232	Transcriptional modulator H2A histone family, member Y (H2AFY) marks Huntington disease activity in man and mouse.	S-EPMC3193232 PMC3193232 Transcriptional modulator H2A histone family, member Y (H2AFY) marks Huntington disease activity in man and mouse. Huntington disease (HD) is a progressive neurodegenerative disease that affects 30,000 individuals in North America. Treatments that slow its relentless course	FALSE
ArrayExpress	S-EPMC4968014	Common disease signatures from gene expression analysis in Huntington's disease human blood and brain.	S-EPMC4968014 PMC4968014 Common disease signatures from gene expression analysis in Huntington's disease human blood and brain. <h4>Background</h4>Huntington's disease (HD) is a devastating brain disorder with no effective treatment or cure available. The scarcity of brain tissue makes it hard	TRUE
ArrayExpress	E-GEOD-79064	DNA methylation profiling in human Huntington's Disease brain	E-GEOD-79064 DNA methylation profiling in human Huntington's Disease brain methylation profiling by array EFO EFO_0002759 Homo sapiens Despite extensive progress in HuntingtonÃ¢??s Disease (HD) research, very little is known about the association of epigenetic variation and HD pathogenesis in human	FALSE
ArrayExpress	S-EPMC4592077	Huntington's disease biomarker progression profile identified by transcriptome sequencing in peripheral blood.	the view that peripheral blood is a useful source to identify biomarkers for Huntington's disease and monitor disease progression in future clinical trials. European journal of human genetics : EJHG 23(10) 1349-56 2015 Oct DOI PMC PMID Mastrokolias A 0000-0002-1909-4006 o1 Ariyurek Y o2 Goeman JJ	TRUE
ArrayExpress	S-EPMC1182457	Genome-wide expression profiling of human blood reveals biomarkers for Huntington's disease.	S-EPMC1182457 PMC1182457 Genome-wide expression profiling of human blood reveals biomarkers for Huntington's disease. Huntington's disease (HD) is an autosomal dominant disorder caused by an expansion of glutamine repeats in ubiquitously distributed huntingtin protein. Recent studies have shown	TRUE
ArrayExpress	S-EPMC7731869	RNA Sequencing of Human Peripheral Blood Cells Indicates Upregulation of Immune-Related Genes in Huntington's Disease.	S-EPMC7731869 PMC7731869 RNA Sequencing of Human Peripheral Blood Cells Indicates Upregulation of Immune-Related Genes in Huntington's Disease. Huntington's disease (HD) is an autosomal dominantly inherited neurodegenerative disorder caused by a trinucleotide repeat expansion in the <i>Huntingtin	TRUE
ArrayExpress	S-EPMC3751855	Longitudinal transcriptomic dysregulation in the peripheral blood of transgenic Huntington's disease monkeys.	S-EPMC3751855 PMC3751855 Longitudinal transcriptomic dysregulation in the peripheral blood of transgenic Huntington's disease monkeys. Huntington's Disease (HD) is a progressive neurodegenerative disorder caused by an expansion in the polyglutamine (polyQ) region of the Huntingtin (HTT) gene. The	FALSE
ArrayExpress	S-EPMC6104454	DNA Methylation Profiles in Whole Blood of Huntington's Disease Patients.	S-EPMC6104454 PMC6104454 DNA Methylation Profiles in Whole Blood of Huntington's Disease Patients. Epigenetic mechanisms, especially DNA methylation, are suggested to play a role in the age-of-onset in Huntington's disease (HD) based on studies on patient brains, and cellular and animal models	FALSE
ArrayExpress	S-EPMC8375100	Kynurenine pathway metabolites in cerebrospinal fluid and blood as potential biomarkers in Huntington's disease.	S-EPMC8375100 PMC8375100 Kynurenine pathway metabolites in cerebrospinal fluid and blood as potential biomarkers in Huntington's disease. Converging lines of evidence from several models, and post-mortem human brain tissue studies, support the involvement of the kynurenine pathway (KP	TRUE
ArrayExpress	S-EPMC4627815	Different Tissue-Derived Stem Cells: A Comparison of Neural Differentiation Capability.	the development of this promising therapeutic approach.<h4>Aim</h4>The innovative aspect of this study has been to evaluate the neural differentiation capability of different tissue-derived stem cells coming from different tissue sources such as bone marrow, umbilical cord blood, human endometrium	FALSE
ArrayExpress	S-EPMC9147436	Huntingtin Co-Isolates with Small Extracellular Vesicles from Blood Plasma of TgHD and KI-HD Pig Models of Huntington's Disease and Human Blood Plasma.	S-EPMC9147436 PMC9147436 Huntingtin Co-Isolates with Small Extracellular Vesicles from Blood Plasma of TgHD and KI-HD Pig Models of Huntington's Disease and Human Blood Plasma. (1) Background: Huntington's disease (HD) is rare incurable hereditary neurodegenerative disorder caused by CAG repeat	FALSE
ArrayExpress	E-GEOD-51799	Huntington's disease biomarker progression profile identified by transcriptome sequencing in peripheral blood	E-GEOD-51799 Huntington's disease biomarker progression profile identified by transcriptome sequencing in peripheral blood RNA-seq of coding RNA EFO EFO_0003738 Homo sapiens In this study we investigated the suitability of blood to identify HD transcriptomic biomarkers, validated the outcome	FALSE
ArrayExpress	S-EPMC5713446	Altered Aconitase 2 Activity in Huntington's Disease Peripheral Blood Cells and Mouse Model Striatum.	S-EPMC5713446 PMC5713446 Altered Aconitase 2 Activity in Huntington's Disease Peripheral Blood Cells and Mouse Model Striatum. Huntington's disease (HD) is caused by an unstable cytosine adenine guanine (CAG) trinucleotide repeat expansion encoding a polyglutamine tract in the huntingtin protein	FALSE
ArrayExpress	E-GEOD-54647	VeraCode GoldenGate Methylation Assay microarray data for purified human leukocytes, reconstruction mixtures and human whole blood samples	E-GEOD-54647 VeraCode GoldenGate Methylation Assay microarray data for purified human leukocytes, reconstruction mixtures and human whole blood samples methylation profiling by array EFO EFO_0002759 Homo sapiens The objective of the study was to utilize DNA methylation to quantify human leukocyte	FALSE
ArrayExpress	S-EPMC9308264	Widespread alterations in microRNA biogenesis in human Huntington's disease putamen.	S-EPMC9308264 PMC9308264 Widespread alterations in microRNA biogenesis in human Huntington's disease putamen. Altered microRNA (miRNA) expression is a common feature of Huntington's disease (HD) and could participate in disease onset and progression. However, little is known about the underlying	Maybe
ArrayExpress	S-EPMC4963448	Integration of targeted metabolomics and transcriptomics identifies deregulation of phosphatidylcholine metabolism in Huntington's disease peripheral blood samples.	S-EPMC4963448 PMC4963448 Integration of targeted metabolomics and transcriptomics identifies deregulation of phosphatidylcholine metabolism in Huntington's disease peripheral blood samples. <h4>Introduction</h4>Metabolic changes have been frequently associated with Huntington's disease (HD). At	TRUE
ArrayExpress	S-EPMC5721130	Absence of Acanthocytosis in Huntington's Disease-like 2: A Prospective Comparison with Huntington's Disease.	and whether acanthocytes can differentiate HDL2 from Huntington's disease (HD).We prospectively compared 13 HD and 12 HDL2 cases against 21 unaffected controls in Johannesburg. Blood smears were prepared using international standards and reviewed by at least two blinded reviewers. An acanthocytosis	Maybe
ArrayExpress	S-EPMC2986171	Decreasing uptake of predictive testing for Huntington's disease in a German centre: 12 years' experience (1993-2004).	S-EPMC2986171 PMC2986171 Decreasing uptake of predictive testing for Huntington's disease in a German centre: 12 years' experience (1993-2004). In this retrospective study, we examined changes in decision-making for and against the predictive genetic test for Huntington's disease including 478	FALSE
ArrayExpress	S-EPMC5359597	Huntington's disease blood and brain show a common gene expression pattern and share an immune signature with Alzheimer's disease.	S-EPMC5359597 PMC5359597 Huntington's disease blood and brain show a common gene expression pattern and share an immune signature with Alzheimer's disease. There is widespread transcriptional dysregulation in Huntington's disease (HD) brain, but analysis is inevitably limited by advanced disease	TRUE
ArrayExpress	S-EPMC8634120	Huntingtin silencing delays onset and slows progression of Huntington's disease: a biomarker study.	address this, we aim to develop non-invasive sensitive biomarkers that provide insight into therapeutic efficacy in the premanifest stage of Huntington's disease. In this study, we mapped the temporal trajectories of arteriolar cerebral blood volumes (CBVa) using inflow-based vascular-space-occupancy	Maybe
ArrayExpress	S-EPMC8516942	Age-related mitochondrial alterations in brain and skeletal muscle of the YAC128 model of Huntington disease.	in HD pathogenesis in both brain and skeletal muscle, and suggest that mtDNAcn in skeletal muscle tissue may be a potential biomarker that should be investigated further in human HD. N/A Huntington Society of Canada U.S. Department of Health &amp; Human Services | NIH | National Heart, Lung, and Blood	FALSE
ArrayExpress	S-EPMC3155522	Brain-derived neurotrophic factor in patients with Huntington's disease.	this measurement, especially in serum. We also assessed BDNF mRNA levels in blood samples from 47 controls, 25 preHD, and 70 HD subjects, and found no differences among the groups. We concluded that levels of BDNF in human blood were not informative (mRNA levels or plasma protein level) nor reliable	TRUE
ArrayExpress	S-EPMC10094222	Peripheral Biomarkers in Manifest and Premanifest Huntington's Disease.	S-EPMC10094222 PMC10094222 Peripheral Biomarkers in Manifest and Premanifest Huntington's Disease. Huntington's disease (HD) is characterized by clinical motor impairment (e.g., involuntary movements, poor coordination, parkinsonism), cognitive deficits, and psychiatric symptoms. An inhered	Maybe
ArrayExpress	S-EPMC2587014	Linking SNPs to CAG repeat length in Huntington's disease patients.	S-EPMC2587014 PMC2587014 Linking SNPs to CAG repeat length in Huntington's disease patients. Allele-specific silencing using small interfering RNAs targeting heterozygous single-nucleotide polymorphisms (SNPs) is a promising therapy for human trinucleotide repeat diseases such as Huntington's	FALSE
ArrayExpress	S-EPMC2628604	Exendin-4 improves glycemic control, ameliorates brain and pancreatic pathologies, and extends survival in a mouse model of Huntington's disease.	loss. Additionally, they suffer from abnormalities in energy metabolism affecting both the brain and periphery. Similarly to Huntington's disease patients, mice expressing the mutated human huntingtin protein also exhibit neurodegenerative changes, motor dysfunction, perturbed energy metabolism	FALSE
ArrayExpress	S-EPMC5943337	Salivary levels of total huntingtin are elevated in Huntington's disease patients.	S-EPMC5943337 PMC5943337 Salivary levels of total huntingtin are elevated in Huntington's disease patients. Patients with Huntington's disease (HD), an autosomal-dominant neurodegenerative disease, show substantial variability in age-of-onset, symptom severity and course of illness, warranting	FALSE
ArrayExpress	S-EPMC4976744	Regulation of P-glycoprotein expression in brain capillaries in Huntington's disease and its impact on brain availability of antipsychotic agents risperidone and paliperidone.	S-EPMC4976744 PMC4976744 Regulation of P-glycoprotein expression in brain capillaries in Huntington's disease and its impact on brain availability of antipsychotic agents risperidone and paliperidone. Huntington's disease (HD) is a neurodegenerative disease marked by an expanded polyglutamine	TRUE
ArrayExpress	S-EPMC3922377	Early defect of transforming growth factor ?1 formation in Huntington's disease.	S-EPMC3922377 PMC3922377 Early defect of transforming growth factor ?1 formation in Huntington's disease. A defective expression or activity of neurotrophic factors, such as brain- and glial-derived neurotrophic factors, contributes to neuronal damage in Huntington's disease (HD). Here, we focused	FALSE
ArrayExpress	S-EPMC6175010	Detailed analysis of HTT repeat elements in human blood using targeted amplification-free long-read sequencing.	S-EPMC6175010 PMC6175010 Detailed analysis of HTT repeat elements in human blood using targeted amplification-free long-read sequencing. Amplification of DNA is required as a mandatory step during library preparation in most targeted sequencing protocols. This can be a critical limitation when	TRUE
ArrayExpress	S-EPMC4527489	Oxidative metabolism in YAC128 mouse model of Huntington's disease.	S-EPMC4527489 PMC4527489 Oxidative metabolism in YAC128 mouse model of Huntington's disease. Alterations in oxidative metabolism are considered to be one of the major contributors to Huntington's disease (HD) pathogenesis. However, existing data about oxidative metabolism in HD are contradictory	FALSE
ArrayExpress	S-EPMC5733638	Molecular interactions governing host-specificity of blood stage malaria parasites.	S-EPMC5733638 PMC5733638 Molecular interactions governing host-specificity of blood stage malaria parasites. Non-human primates harbor diverse species of malaria parasites, including the progenitors of Plasmodium falciparum and Plasmodium vivax. Cross-species transmission of some malaria	FALSE
ArrayExpress	S-EPMC4820332	Protection by dietary restriction in the YAC128 mouse model of Huntington's disease: Relation to genes regulating histone acetylation and HTT.	were associated with reduced striatal human (but not mouse) HTT expression, as well as alteration in gene expression regulating histone acetylation modifications, particularly Hdac2. Other mRNAs related to Huntington's pathology in striatal tissue showed significant modulation by the transgene, dietary	FALSE
ArrayExpress	S-EPMC11613659	Ascertainment of uninterrupted CAG repeat length and disease-modifying variants in fragment-based genetic testing for Huntington Disease.	S-EPMC11613659 PMC11613659 Ascertainment of uninterrupted CAG repeat length and disease-modifying variants in fragment-based genetic testing for Huntington Disease. <h4>Purpose</h4>In Huntington disease (HD), synonymous variants causing loss or duplication of the interrupting CAA codon in the <i	Maybe
ArrayExpress	S-EPMC8247328	Safety, pharmacokinetics and pharmacodynamics of SBT-020 in patients with early stage Huntington's disease, a 2-part study.	S-EPMC8247328 PMC8247328 Safety, pharmacokinetics and pharmacodynamics of SBT-020 in patients with early stage Huntington's disease, a 2-part study. <h4>Aims</h4>Huntington's disease (HD) is a neurodegenerative disease with cognitive, motor and psychiatric symptoms. Toxic accumulation of misfolded	Maybe
ArrayExpress	S-EPMC7484780	DNA methylation study of Huntington's disease and motor progression in patients and in animal models.	methylation levels in six different tissues from 3 species: a mouse huntingtin (Htt) gene knock-in model, a transgenic HTT sheep model, and humans. Our epigenome-wide association study (EWAS) of human blood reveals that HD mutation status is significantly (pâ€‰<â€‰10<sup>-7</sup>) associated with 33 CpG sites	TRUE
ArrayExpress	S-EPMC9253406	Behavioral- and blood-based biomarkers for Huntington's disease: Studies on the R6/1 mouse model with prospects for early diagnosis and monitoring of the disease.	S-EPMC9253406 PMC9253406 Behavioral- and blood-based biomarkers for Huntington's disease: Studies on the R6/1 mouse model with prospects for early diagnosis and monitoring of the disease. <h4>Background</h4>Huntington's disease (HD) is a genetic neurodegenerative disorder characterized by a triad	FALSE
ArrayExpress	S-EPMC10509525	Study protocol of IMAGINE-HD: Imaging iron accumulation and neuroinflammation with 7T-MRIÂ +Â CSF in Huntington's disease.	S-EPMC10509525 PMC10509525 Study protocol of IMAGINE-HD: Imaging iron accumulation and neuroinflammation with 7T-MRIÂ +Â CSF in Huntington's disease. <h4>Introduction</h4>Strong evidence suggests a significant role for iron accumulation in the brain in addition to the well-documented	FALSE
ArrayExpress	S-EPMC3506453	Astrocytes generated from patient induced pluripotent stem cells recapitulate features of Huntington's disease patient cells.	S-EPMC3506453 PMC3506453 Astrocytes generated from patient induced pluripotent stem cells recapitulate features of Huntington's disease patient cells. <h4>Background</h4>Huntington's Disease (HD) is a devastating neurodegenerative disorder that clinically manifests as motor dysfunction, cognitive	FALSE
ArrayExpress	S-EPMC8049011	Statistical method for modeling sequencing data from different technologies in longitudinal studies with application to Huntington disease.	insight into the causes of these different results. Our work is motivated by a study of gene expression data of blood samples from Huntington disease patients, which were obtained using two different sequencing technologies. At time point 1, DeepSAGE technology was used to measure the gene expression	Maybe
ArrayExpress	E-GEOD-29678	Expression profiling of human peripheral blood before and after omega 3 dietary supplement.	E-GEOD-29678 Expression profiling of human peripheral blood before and after omega 3 dietary supplement. transcription profiling by array EFO EFO_0002768 Homo sapiens Patients with early stage CLL were recruited into the study and administered a course of omega 3 dietary supplements. Expression	FALSE
ArrayExpress	S-EPMC4435974	Regional vulnerability in Huntington's disease: fMRI-guided molecular analysis in patients and a mouse model of disease.	S-EPMC4435974 PMC4435974 Regional vulnerability in Huntington's disease: fMRI-guided molecular analysis in patients and a mouse model of disease. Although the huntingtin gene is expressed in brain throughout life, phenotypically Huntington's disease (HD) begins only in midlife and affects specific	FALSE
ArrayExpress	S-EPMC9352962	A probable <i>cis</i>-acting genetic modifier of Huntington disease frequent in individuals with African ancestry.	S-EPMC9352962 PMC9352962 A probable <i>cis</i>-acting genetic modifier of Huntington disease frequent in individuals with African ancestry. Huntington disease (HD)is a dominantly inherited neurodegenerative disorder caused by the expansion of a polyglutamine encoding CAG repeat in the huntingtin	Maybe
ArrayExpress	S-EPMC5402279	Allele-Selective Suppression of Mutant Huntingtin in Primary Human Blood Cells.	S-EPMC5402279 PMC5402279 Allele-Selective Suppression of Mutant Huntingtin in Primary Human Blood Cells. Post-transcriptional gene silencing is a promising therapy for the monogenic, autosomal dominant, Huntington's disease (HD). However, wild-type huntingtin (HTT) has important cellular functions	TRUE
ArrayExpress	S-EPMC4262574	Characterisation of immune cell function in fragment and full-length Huntington's disease mouse models.	S-EPMC4262574 PMC4262574 Characterisation of immune cell function in fragment and full-length Huntington's disease mouse models. Inflammation is a growing area of research in neurodegeneration. In Huntington's disease (HD), a fatal inherited neurodegenerative disease caused by a CAG-repeat	FALSE
ArrayExpress	S-EPMC5561550	Peripubertal blood lead levels and growth among Russian boys.	S-EPMC5561550 PMC5561550 Peripubertal blood lead levels and growth among Russian boys. <h4>Background</h4>Childhood blood lead levels (BLL) have been associated with growth impairment.<h4>Objectives</h4>We assessed associations of peripubertal BLL with adolescent growth and near adult height	FALSE
ArrayExpress	E-GEOD-8762	Lymphocyte gene expression data from moderate stage HD patients and controls	"GSM217772.CEL" OR "GSM217771.CEL" OR "GSM217770.CEL" OR "GSM217769.CEL" OR "GSM217768.CEL" OR "GSM217767.CEL" OR "GSM217766.CEL" Homo sapiens blood lymphocyte female male 60 year 46 year 38 year 42 year 62 year 30 year 44 year 43 year 41 year 68 year 55 year 50 year 51 year 56 year 61 year ... 3 other	TRUE
ArrayExpress	S-EPMC4175394	Plasmodium falciparum transmission stages accumulate in the human bone marrow.	S-EPMC4175394 PMC4175394 Plasmodium falciparum transmission stages accumulate in the human bone marrow. Transmission of Plasmodium falciparum malaria parasites requires formation and development of gametocytes, yet all but the most mature of these sexual parasite forms are absent from the blood	FALSE
ArrayExpress	S-EPMC4007519	Human exposure to nitro musks and the evaluation of their potential toxicity: an overview.	S-EPMC4007519 PMC4007519 Human exposure to nitro musks and the evaluation of their potential toxicity: an overview. Synthetic nitro musks are fragrant chemicals found in household and personal care products. The use of these products leads to direct exposures via dermal absorption, as well	FALSE
ArrayExpress	S-EPMC1636828	DNA repair protein involved in heart and blood development.	S-EPMC1636828 PMC1636828 DNA repair protein involved in heart and blood development. Apurinic/apyrimidinic endonuclease 1, a key enzyme in repairing abasic sites in DNA, is an embryonic lethal in mice. We are examining its role in embryogenesis in zebra fish. Zebra fish contain two genomic copies	FALSE
ArrayExpress	S-EPMC7844365	Human coronaviruses in idiopathic Parkinson's disease: Implications of SARS-CoV-2's modulation of the host's transcriptome.	S-EPMC7844365 PMC7844365 Human coronaviruses in idiopathic Parkinson's disease: Implications of SARS-CoV-2's modulation of the host's transcriptome. <h4>Objective</h4>A recent study on the effects of SARS-CoV-2 infection on the host's transcriptome indicated the perturbation of several pathways	FALSE
ArrayExpress	S-SCDT-10_1038-S44321-023-00020-Y	Lowering mutant huntingtin by small molecules relieves Huntington's disease symptoms and progression	.obolibrary.org/obo/OBI_0001418 dose response design OBI HTT assayed protein 9606 P42858 https://www.uniprot.org/uniprot/P42858 HTT Uniprot patient component organism None 9606 http://www.ncbi.nlm.nih.gov/taxonomy/9606 Homo sapiens NCBI taxon SPI-77,SPI-24 intervention molecule None None null None None HD	TRUE
ArrayExpress	S-EPMC5526324	Maternal blood contamination of collected cord blood can be identified using DNA methylation at three CpGs.	to inform on a sensitive period of human development. However, the introduction of maternal blood during labor or cross-contamination during sample collection may complicate downstream analyses. After discovering maternal contamination of cord blood in a cohort study of 150 neonates using Illumina 450K	FALSE
ArrayExpress	E-GEOD-55468	Genome-wide analysis of gene expression variation in CD4+ T cells from patients with active rheumatoid arthritis (RA).	E-GEOD-55468 Genome-wide analysis of gene expression variation in CD4+ T cells from patients with active rheumatoid arthritis (RA). transcription profiling by array EFO EFO_0002768 Homo sapiens Analysis of the regulatory architecture of gene expression variation in CD4+ T cells from patients	FALSE
ArrayExpress	E-GEOD-54671	Quantitative reconstruction of leukocyte subsets using DNA methylation	subtype 5 Citrate, Fresh Human whole blood 6 B-Cells Purified WBC subtype 5 neutrophils Purified WBC subtype 5 EDTA, Fresh Human whole blood 6 CD4+ T-cells Purified WBC subtype 5 normal Homo sapiens CD16+ NK cells Granuloctyes Heparin, Fresh Citrate, o/n at 4C CD8- NK cells Pan-NK cells basophils	FALSE
ArrayExpress	S-EPMC3953952	Anti-citrullinated peptide autoantibodies, human leukocyte antigen shared epitope and risk of future rheumatoid arthritis: a nested case-control study.	in pre-clinical rheumatoid arthritis (RA) with and without Human Leukocyte Antigen-Shared Epitope (HLA-SE) alleles.<h4>Methods</h4>We identified 192 women in the Nurses' Health Study cohorts with blood samples obtained 4 months to 17 years prior to medical record-confirmed RA diagnosis. Three controls	FALSE
ArrayExpress	S-EPMC4177605	Whole gene expression profile in blood reveals multiple pathways deregulation in R6/2 mouse model.	S-EPMC4177605 PMC4177605 Whole gene expression profile in blood reveals multiple pathways deregulation in R6/2 mouse model. <h4>Background</h4>Huntington Disease (HD) is a progressive neurological disorder, with pathological manifestations in brain areas and in periphery caused by the ubiquitous	FALSE
ArrayExpress	S-EPMC5822408	Rapid loss of group 1 innate lymphoid cells during blood stage <i>Plasmodium</i> infection.	that blood stage infection was initiated intravenously in our experimental models, and thus bypassed the liver stage of infection, which may influence the immune response during the blood stage.<h4>Conclusion</h4>Our results show that ILC1s are lost early during mouse and human malaria	FALSE
ArrayExpress	S-EPMC2846941	RBC and WBC fatty acid composition following consumption of an omega 3 supplement: lessons for future clinical trials.	media or in the diet of the animals can suppress the growth of cancers. When human clinical trials are initiated to determine the ability of omega 3 fatty acids to alter growth or response to chemotherapeutic interventions of cancers, it will be essential to determine the omega 3 intake	FALSE
ArrayExpress	S-EPMC4604084	The Effect of Statins on Blood Gene Expression in COPD.	>Methods</h4>Whole blood gene expression was measured on 168 statin users and 451 non-users from the ECLIPSE study using the Affymetrix Human Gene 1.1 ST microarray chips. Factor Analysis for Robust Microarray Summarization (FARMS) was used to process the expression data. Differential gene expression	FALSE
ArrayExpress	S-EPMC6506781	Loss-of-Function in SMAD4 Might Not Be Critical for Human Natural Killer Cell Responsiveness to TGF-Î².	S-EPMC6506781 PMC6506781 Loss-of-Function in SMAD4 Might Not Be Critical for Human Natural Killer Cell Responsiveness to TGF-Î². We characterized the NK cell phenotype and function in three family members with Hereditary Hemorrhagic Telangiectasia (HHT) due to heterozygous SMAD4 mutations	FALSE
ArrayExpress	S-EPMC7946873	Data-driven curation process for describing the blood glucose management in the intensive care unit.	S-EPMC7946873 PMC7946873 Data-driven curation process for describing the blood glucose management in the intensive care unit. Analysis of real-world glucose and insulin clinical data recorded in electronic medical records can provide insights into tailored approaches to clinical care, yet presents	FALSE
ArrayExpress	S-EPMC8513574	Insulin-like growth factor 2 (IGF2) protects against Huntington's disease through the extracellular disposal of protein aggregates.	to a significant decrease in the levels of mutant huntingtin in three different animal models. Moreover, analysis of human postmortem brain tissue and blood samples from HD patients showed a reduction in IGF2 level. This study identifies IGF2 as a relevant factor deregulated in HD, operating as a disease	TRUE
ArrayExpress	S-EPMC18676	Identification of phylogenetic footprints in primate tumor necrosis factor-alpha promoters.	2000 Jun DOI PMC PMID Leung JY o1 McKenzie FE o2 Uglialoro AM o2 Flores-Villanueva PO 0000-0002-6184-4616 o2 Sorkin BC 0000-0001-8198-6921 o2 Yunis EJ o2 Hartl DL o2 Goldfeld AE o2 Center for Blood Research and Department of Medicine, Harvard Medical School, 800 Huntington Avenue, Boston, MA 02115	FALSE
ArrayExpress	S-EPMC3971351	Pathprinting: An integrative approach to understand the functional basis of disease.	overcomes platform, species and batch effects to yield a standard measure of functional distance between experiments. We show that pathprints combine mouse and human blood developmental lineage, and can be used to identify new prognostic indicators in acute myeloid leukemia. The code and resources	FALSE
ArrayExpress	S-EPMC10041521	Fluorescent Activity-Based Probe To Image and Inhibit Factor XIa Activity in Human Plasma.	S-EPMC10041521 PMC10041521 Fluorescent Activity-Based Probe To Image and Inhibit Factor XIa Activity in Human Plasma. Anticoagulation therapy is a mainstay of the treatment of thrombotic disorders; however, conventional anticoagulants trade antithrombotic benefits for bleeding risk. Factor (f) XI	FALSE
ArrayExpress	S-EPMC9200056	Parallel imaging of coagulation pathway proteases activated protein C, thrombin, and factor Xa in human plasma.	S-EPMC9200056 PMC9200056 Parallel imaging of coagulation pathway proteases activated protein C, thrombin, and factor Xa in human plasma. Activated protein C (APC), thrombin, and factor (f) Xa are vitamin K-dependent serine proteases that are key factors in blood coagulation. Moreover, they play	FALSE
ArrayExpress	S-EPMC1182430	Recombinant AAV2 transduction of primitive human hematopoietic stem cells capable of serial engraftment in immune-deficient mice.	S-EPMC1182430 PMC1182430 Recombinant AAV2 transduction of primitive human hematopoietic stem cells capable of serial engraftment in immune-deficient mice. A recombinant AAV2 (rAAV2) vector encoding antisense RNA to HIV-1 transactivating region (TAR) was evaluated for transduction of human cord	FALSE
ArrayExpress	S-EPMC3352992	Tag-free microfluidic separation of cells against multiple markers.	describes how such separation can be accomplished in a series of microfluidic systems without the need for such tags. Two capture stages containing antibody-functionalized alginate hydrogels are utilized for the isolation of CD34+ and Flk1+ cells from untreated, whole human blood. The capture-release	FALSE
ArrayExpress	S-EPMC5506438	Caenorhabditis elegans orthologs of human genes differentially expressed with age are enriched for determinants of longevity.	S-EPMC5506438 PMC5506438 Caenorhabditis elegans orthologs of human genes differentially expressed with age are enriched for determinants of longevity. We report a systematic RNAi longevity screen of 82 Caenorhabditis elegans genes selected based on orthology to human genes differentially expressed	FALSE
ArrayExpress	S-EPMC7138855	The Na/K-ATPase Î±1 and c-Src form signaling complex under native condition: A crosslinking approach.	; Human Services | NIH | National Institute of Diabetes and Digestive and Kidney Diseases 1R15DK106666 U.S. Department of Health &amp; Human Services | NIH | National Heart, Lung, and Blood Institute HL071556 Scientific reports 10(1) 6006 2020 Apr DOI PMC PMID Nie Y o1 Bai F o1 Chaudhry MA	FALSE
ArrayExpress	S-EPMC6454504	Age-Related Expression of Human AT1R Variants and Associated Renal Dysfunction in Transgenic Mice.	S-EPMC6454504 PMC6454504 Age-Related Expression of Human AT1R Variants and Associated Renal Dysfunction in Transgenic Mice. <h4>Background</h4>The contribution of single nucleotide polymorphisms in transcriptional regulation of the human angiotensin receptor type I (hAT1R) gene in age-related	FALSE
ArrayExpress	S-EPMC3687518	Malaria-infected erythrocyte-derived microvesicles mediate cellular communication within the parasite population and with the host immune system.	blood cells (RBCs), denoted RMVs. Studies in mice have shown that RMVs are elevated during infection and have proinflammatory activity. Here we present a detailed characterization of RMV composition and function in the human malaria parasite Plasmodium falciparum. Proteomics profiling revealed	FALSE
ArrayExpress	S-EPMC1563694	Genomic sites of human immunodeficiency virus type 2 (HIV-2) integration: similarities to HIV-1 in vitro and possible differences in vivo.	S-EPMC1563694 PMC1563694 Genomic sites of human immunodeficiency virus type 2 (HIV-2) integration: similarities to HIV-1 in vitro and possible differences in vivo. Retroviruses have distinct preferences in integration site selection in the host cell genome during in vitro infection, with human	FALSE
ArrayExpress	S-EPMC5576211	Blood lead levels and neurodevelopmental function in perinatally HIV-exposed, uninfected children in a US-based longitudinal cohort study.	S-EPMC5576211 PMC5576211 Blood lead levels and neurodevelopmental function in perinatally HIV-exposed, uninfected children in a US-based longitudinal cohort study. <h4>Background</h4>While children's exposure to environmental lead in the U.S. has decreased, areas of elevated levels remain. Because	FALSE
ArrayExpress	S-EPMC7418728	Natural Killer cell activation, reduced ACE2, TMPRSS2, cytokines G-CSF, M-CSF and SARS-CoV-2-S pseudovirus infectivity by MEK inhibitor treatment of human cells.	S-EPMC7418728 PMC7418728 Natural Killer cell activation, reduced ACE2, TMPRSS2, cytokines G-CSF, M-CSF and SARS-CoV-2-S pseudovirus infectivity by MEK inhibitor treatment of human cells. COVID-19 affects vulnerable populations including elderly individuals and patients with cancer. Natural Killer	FALSE
ArrayExpress	S-EPMC8785538	Spatiotemporal distribution, abundance, and host interactions of two invasive vectors of arboviruses, Aedes albopictus and Aedes japonicus, in Pennsylvania, USA.	of blood meals were determined by analyzing mitochondrial cytochrome b gene sequences amplified in PCR assays.<h4>Results</h4>A total of 10,878,727 female mosquitoes representing 51 species were collected in Pennsylvania over the 9-year study period, with Ae. albopictus and Ae. japonicus representing 4	FALSE
ArrayExpress	S-EPMC6314084	Actinobaculum massiliense Proteome Profiled in Polymicrobial Urethral Catheter Biofilms.	S-EPMC6314084 PMC6314084 Actinobaculum massiliense Proteome Profiled in Polymicrobial Urethral Catheter Biofilms. Actinobaculum massiliense, a Gram-positive anaerobic coccoid rod colonizing the human urinary tract, belongs to the taxonomic class of Actinobacteria. We identified A. massiliense	FALSE
ArrayExpress	S-EPMC6098021	Na/K-ATPase Y260 Phosphorylation-mediated Src Regulation in Control of Aerobic Glycolysis and Tumor Growth.	CA177558 U.S. Department of Health &amp;amp; Human Services | NIH | National Heart, Lung, and Blood Institute HL-109015 NHLBI NIH HHS R01 HL109015 Scientific reports 8(1) 12322 2018 Aug DOI PMC PMID Banerjee M 0000-0002-4463-7914 o1 Cui X o1 Li Z o2 Yu H o1 Cai L 0000-0001-9192-2673 o1 Jia X o1 He D	FALSE
ArrayExpress	S-EPMC5532064	Cardiotonic Steroids Stimulate Macrophage Inflammatory Responses Through a Pathway Involving CD36, TLR4, and Na/K-ATPase.	; and Departments of Medicine, Pharmacology and Surgery, Joan C. Edwards School of Medicine, Marshall University, Huntington, WV (Z.X.). From the Blood Research Institute, Blood Center of Wisconsin, Milwaukee (Y.C., W.H., M.Y., G.X., W.C., R.L.S.); Department of Cell Biology, Neurobiology and Anatomy (M	FALSE
ArrayExpress	S-EPMC3979039	Altered expression of protein tyrosine phosphatase, non-receptor type 22 isoforms in systemic lupus erythematosus.	S-EPMC3979039 PMC3979039 Altered expression of protein tyrosine phosphatase, non-receptor type 22 isoforms in systemic lupus erythematosus. A C-to-T single nucleotide polymorphism (SNP) located at position 1858 of human protein tyrosine phosphatase, non-receptor type 22 (PTPN22) complementary DNA	FALSE
ArrayExpress	S-EPMC2656934	The genome of the simian and human malaria parasite Plasmodium knowlesi.	S-EPMC2656934 PMC2656934 The genome of the simian and human malaria parasite Plasmodium knowlesi. Plasmodium knowlesi is an intracellular malaria parasite whose natural vertebrate host is Macaca fascicularis (the 'kra' monkey); however, it is now increasingly recognized as a significant cause	FALSE
ArrayExpress	S-EPMC10896768	Effects of Electronic Cigarette Vaping on Cardiac and Vascular Function, and Post-myocardial Infarction Remodeling in Rats.	function, and post-MI remodeling were assessed. Baseline blood flow in the femoral artery did not differ between groups, but peak reperfusion blood flow was blunted in the E-cig group (1.59â€‰Â±â€‰0.15Â ml/min) vs. the air group (2.11â€‰Â±â€‰0.18Â ml/min; pâ€‰=â€‰0.034). Femoral artery diameter after reperfusion	FALSE
ArrayExpress	S-EPMC4299500	Common dysregulation network in the human prefrontal cortex underlies two neurodegenerative diseases.	S-EPMC4299500 PMC4299500 Common dysregulation network in the human prefrontal cortex underlies two neurodegenerative diseases. Using expression profiles from postmortem prefrontal cortex samples of 624 dementia patients and non-demented controls, we investigated global disruptions	FALSE
ArrayExpress	S-EPMC136554	Magnitude and frequency of cytotoxic T-lymphocyte responses: identification of immunodominant regions of human immunodeficiency virus type 1 subtype C.	S-EPMC136554 PMC136554 Magnitude and frequency of cytotoxic T-lymphocyte responses: identification of immunodominant regions of human immunodeficiency virus type 1 subtype C. A systematic analysis of immune responses on a population level is critical for a human immunodeficiency virus type 1 (HIV-1	FALSE
ArrayExpress	S-EPMC3205478	Heart health when life is satisfying: evidence from the Whitehall II cohort study.	, and Health , Harvard School of Public Health , Huntington Avenue, Boston, MA , Department of Society, Human Development, and Health, Harvard School of Public Health, 677 Huntington Avenue, Boston, MA 02115, USA. jboehm@hsph.harvard.edu supp_32_21_2672__index.html supp_ehr203_ehr203supp.doc 10.1093/eurheartj/ehr203 10.1093/eurheartj/ehr203 PMC3205478 21727096	FALSE
ArrayExpress	S-EPMC3951744	Lead exposure and rate of change in cognitive function in older women.	equivalent to being 0.33 years older). We found little support for associations between cognitive decline and patella or blood lead, which provide integrated measures of exposure over shorter timeframes.<h4>Conclusions</h4>Long-term cumulative lead exposure may be weakly associated with faster	FALSE
ArrayExpress	S-EPMC7167334	Cord blood DNA methylation of DNMT3A mediates the association between in utero arsenic exposure and birth outcomes: Results from a prospective birth cohort in Bangladesh.	S-EPMC7167334 PMC7167334 Cord blood DNA methylation of DNMT3A mediates the association between in utero arsenic exposure and birth outcomes: Results from a prospective birth cohort in Bangladesh. <h4>Background</h4>Fetal epigenetic programming plays a critical role in development. DNA	FALSE
ArrayExpress	S-EPMC2949186	Glial dysfunction in abstinent methamphetamine abusers.	'cause and effect' between glial failure and neuronal injury. NIDA NIH HHS K25DA21112 DOI Journal of Cerebral Blood Flow & Metabolism 30(5) 950-60 2010 May Sailasuta N o1 Abulseoud O o2 Harris KC o3 Ross BD o4 Clinical Spectroscopy Unit, Huntington Medical Research Institutes , Pasadena, California	FALSE
ArrayExpress	E-GEOD-56298	Allele-Specific Methylation Occurs at Genetic Variants Associated with Complex Disease	,SRS583426,SRS583427,SRS583431,SRS583433,SRS583435,SRS583436,SRS583437,SRS583438,SRS583439,SRS583440,SRS583441,SRS583443,SRS583444,SRS583445,SRS583446,SRS583448,SRS583449,SRS583453,SRS583454,SRS583458 Not Hispanic Homo sapiens whole blood White female male female 42 https://www.ebi.ac.uk/ena/browser	FALSE
ArrayExpress	S-EPMC1474138	Comprehensive association testing of common mitochondrial DNA variation in metabolic disease.	) alterations in oxidative phosphorylation are characteristic of type 2 diabetes, Parkinson disease, Huntington disease, and other diseases; and (c) common missense variants in the mitochondrial genome (mtDNA) have been implicated as having been subject to natural selection for adaptation to cold climates	Maybe
ArrayExpress	S-EPMC7288927	Systematic metabolic analysis of potential target, therapeutic drug, diagnostic method and animal model applicability in three neurodegenerative diseases.	aimed to conduct a systematic metabolic analysis of Alzheimer's disease (AD), Parkinson's disease (PD) and Huntington's disease (HD). Human and mouse model microarray datasets were downloaded from the Gene Expression Omnibus database. The metabolic genes and pathways were collected from the Recon 3D	FALSE
ArrayExpress	S-EPMC6284456	Dissociation between urate and blood pressure in mice and in people with early Parkinson's disease.	S-EPMC6284456 PMC6284456 Dissociation between urate and blood pressure in mice and in people with early Parkinson's disease. <h4>Background</h4>Epidemiological, laboratory and clinical studies have established an association between elevated urate and high blood pressure (BP). However	FALSE
ArrayExpress	S-EPMC10141503	Umbilical cord DNA methylation is associated with body mass index trajectories from birth to adolescence.	S-EPMC10141503 PMC10141503 Umbilical cord DNA methylation is associated with body mass index trajectories from birth to adolescence. <h4>Background</h4>DNA methylation (DNAm) in cord blood has been associated with various prenatal factors and birth outcomes. This study sought to fill an important	FALSE
ArrayExpress	S-EPMC6367058	Blood-brain barrier breakdown is an early biomarker of human cognitive dysfunction.	S-EPMC6367058 PMC6367058 Blood-brain barrier breakdown is an early biomarker of human cognitive dysfunction. Vascular contributions to cognitive impairment are increasingly recognized<sup>1-5</sup> as shown by neuropathological<sup>6,7</sup>, neuroimaging<sup>4,8-11</sup>, and cerebrospinal fluid	FALSE
ArrayExpress	S-EPMC3656385	Development of a Chip/Chip/SRM platform using digital chip isoelectric focusing and LC-Chip mass spectrometry for enrichment and quantitation of low abundance protein biomarkers in human plasma.	S-EPMC3656385 PMC3656385 Development of a Chip/Chip/SRM platform using digital chip isoelectric focusing and LC-Chip mass spectrometry for enrichment and quantitation of low abundance protein biomarkers in human plasma. Protein biomarkers are critical for diagnosis, prognosis, and treatment	FALSE
ArrayExpress	S-EPMC7969998	Does Prenatal Exposure to CNS Stimulants Increase the Risk of Cardiovascular Disease in Adult Offspring?	HL145546 National Heart, Lung, and Blood Institute Frontiers in cardiovascular medicine 8 652634 2021 DOI PMC PMID Rorabaugh BR o1 Department of Pharmaceutical Science, Marshall University School of Pharmacy, Huntington, WV, United States. Table_1.DOCX 10.3389/fcvm.2021.652634 PMC7969998 33748200	FALSE
ArrayExpress	S-EPMC6367058	Blood-brain barrier breakdown is an early biomarker of human cognitive dysfunction.	S-EPMC6367058 PMC6367058 Blood-brain barrier breakdown is an early biomarker of human cognitive dysfunction. Vascular contributions to cognitive impairment are increasingly recognized<sup>1-5</sup> as shown by neuropathological<sup>6,7</sup>, neuroimaging<sup>4,8-11</sup>, and cerebrospinal fluid	FALSE
ArrayExpress	S-EPMC9101250	Mapping the prothrombin-binding site of pseutarin C by site-directed PEGylation.	in prothrombin binding and in the presentation of Arg320 for initial cleavage. British Heart Foundation RG/16/9/32391 Blood 139(19) 2972-2982 2022 May DOI PMC PMID Ustok FI 0000-0001-7070-4175 o1 Huntington JA o1 Department of Haematology, Cambridge Institute for Medical Research, University of Cambridge	FALSE
ArrayExpress	S-EPMC5711624	Near infrared spectroscopy for measuring changes in bone hemoglobin content after exercise in individuals with spinal cord injury.	are expensive and highly invasive. This study presents a custom built near-infrared spectroscopy (NIRS) instrument to measure changes in bone blood perfusion. We demonstrated the efficacy of this device by monitoring oxygenated and deoxygenated hemoglobin changes in the human tibia during and after exercise	FALSE
ArrayExpress	S-EPMC6744888	Endogenous fluctuations in the dopaminergic midbrain drive behavioral choice variability.	S-EPMC6744888 PMC6744888 Endogenous fluctuations in the dopaminergic midbrain drive behavioral choice variability. Human behavior is surprisingly variable, even when facing the same problem under identical circumstances. A prominent example is risky decision making. Economic theories struggle	FALSE
ArrayExpress	S-EPMC2932764	MicroRNAs as effectors of brain function with roles in ischemia and injury, neuroprotection, and neurodegeneration.	to ischemic preconditioning that leads to endogenous neuroprotection. In addition, microRNAs are implicated in neurodegenerative disorders, including Alzheimer's, Huntington, Parkinson, and Prion disease. The discovery of microRNAs has expanded the potential for human diseases to arise from genetic	FALSE
ArrayExpress	S-EPMC8934682	The role of junctophilin proteins in cellular function.	, as well as functional roles of JPH isoforms in excitable cells. Finally, potential roles of JPH isoform deficits in human disease pathogenesis will be reviewed. NHLBI NIH HHS R01 HL091947 NHLBI NIH HHS R01 HL147108 HHS | NIH | National Heart, Lung, and Blood Institute HL091947 HHS | NIH | National	FALSE
ArrayExpress	S-EPMC10066375	Aging reduces calreticulin expression and alters spontaneous calcium signals in astrocytic endfeet of the mouse dorsolateral striatum.	& Human Services | NIH | National Heart, Lung, and Blood Institute (NHLBI) R01HL155618 (BAGHER) npj aging 9(1) 5 2023 Mar DOI PMC PMID Zarate SM o1 Huntington TE o1 Bagher P o2 Srinivasan R o3 Department of Cellular and Integrative Physiology, University of Nebraska Medical Center, Omaha, NE, 68198	FALSE
ArrayExpress	S-EPMC11697022	Functional large-conductance calcium and voltage-gated potassium channels in extracellular vesicles act as gatekeepers of structural and functional integrity.	> in functioning as gatekeepers and maintaining EV-mediated signaling. U.S. Department of Health & Human Services | NIH | National Heart, Lung, and Blood Institute (NHLBI) HL136232 NCATS NIH HHS R13 TR004344 U.S. Department of Health & Human Services | NIH | National Center for Advancing Translational Sciences	FALSE
ArrayExpress	S-EPMC5850735	Serum omega-3 fatty acids and treatment outcomes among women undergoing assisted reproduction.	of long-chain Ï‰3-PUFA were positively associated with probability of live birth among women undergoing ART. WHAT IS KNOWN ALREADY:Intake of Ï‰3-PUFA improves oocyte and embryo quality in animal and human studies. However, a recent cohort study found no relation between circulating Ï‰3-PUFA levels	FALSE
ArrayExpress	S-EPMC3798993	Crystal structure of the prothrombinase complex from the venom of Pseudonaja textilis.	NHLBI NIH HHS R01-HL88010 Wellcome Trust 100140 NHLBI NIH HHS P01 HL74124 Blood 122(16) 2777-83 2013 Oct DOI DOI PMC PMID Lechtenberg BC 0000-0002-5674-6894 o1 Murray-Rust TA o2 Johnson DJ o2 Adams TE o2 Krishnaswamy S o3 Camire RM o3 Huntington JA o2 Children's Hospital of Philadelphia, Philadelphia	FALSE
ArrayExpress	S-EPMC2636996	Febrile temperature leads to significant stiffening of Plasmodium falciparum parasitized erythrocytes.	established that during intra-erythrocytic maturation of the parasite in the red blood cell (RBC), the RBC becomes significantly more cytoadhesive and less deformable; these and other biochemical factors together with human host factors such as compromised immune status are important contributors	FALSE
ArrayExpress	S-EPMC7961126	Pulmonary fate and consequences of transferrin-functionalized gold nanoparticles.	potential due to their optoelectronic properties, minimal alveoli to blood translocation, and possibility of specific cell targeting. Here, we examined whether coating Au NPs with transferrin alters their protein corona, uptake by macrophages, and pulmonary translocation. <b>Methods:</b> Rats were	FALSE
ArrayExpress	E-MTAB-3732	A comprehensive human expression map	E-MTAB-3732 A comprehensive human expression map transcription profiling by array EFO EFO_0002768 Homo sapiens A compiled human gene expression, ontology-annotated dataset from publicly available data including 27887 Affymetrix HG-U133Plus2 arrays, filtered for quality control. The dataset contains	FALSE
ArrayExpress	S-EPMC7679035	MEK inhibitors reduce cellular expression of ACE2, pERK, pRb while stimulating NK-mediated cytotoxicity and attenuating inflammatory cytokines relevant to SARS-CoV-2 infection.	infection of human cells. MEKi may attenuate SARS-CoV-2 infection to allow immune responses and antiviral agents to control disease progression. NIGMS NIH HHS P20 GM119943 NIGMS NIH HHS P30 GM122732 Oncotarget 11(46) 4201-4223 2020 Nov DOI PMC PMID Zhou L o1 Huntington K 0000-0002-5810-8220 o1 Zhang	FALSE
ArrayExpress	S-EPMC5121507	Rapamycin Attenuates Cardiac Fibrosis in Experimental Uremic Cardiomyopathy by Reducing Marinobufagenin Levels and Inhibiting Downstream Pro-Fibrotic Signaling.	of MBG in human JEG-2 cells. Male Sprague-Dawley rats were subjected to either partial nephrectomy (PNx), infusion of MBG, and/or infusion of rapamycin through osmotic minipumps. PNx animals showed marked increase in plasma MBG levels (1025Â±60 vs 377Â±53Â pmol/L; P<0.01), systolic blood pressure (169Â±1	FALSE
ArrayExpress	S-EPMC3640834	Early life predictors of atrial fibrillation-related mortality: evidence from the health and retirement study.	of Medicine, Boston University School of Medicine, Department of Epidemiology, Boston University School of Public Health, Boston, Massachusetts, USA; Boston University and National Heart, Lung, and Blood Institute's Framingham Heart Study, Framingham, Massachusetts, USA Department of Society, Human	FALSE
ArrayExpress	S-EPMC8238482	BCL-XL antagonism selectively reduces neutrophil life span within inflamed tissues without causing neutropenia.	apoptosis in inflammatory human neutrophils ex vivo. Moreover, in murine models of acute and chronic inflammatory disease, it reduced inflammatory neutrophil numbers and ameliorated tissue pathology. In contrast, there was minimal effect on circulating neutrophils. Thus, we show a differential	FALSE
ArrayExpress	S-EPMC8671114	Race, geographical location and other risk factors for hypertension: South African National Health and Nutrition Examination Survey 2011/12.	of South Africans.<h4>Methods</h4>Data were analysed on individuals â‰¥15 years who underwent a physical examination in the SANHANES (nÂ =Â 7443). Hypertension was defined by blood pressure â‰¥140/90Â mmHg or self-reported hypertension medication usage. Stepwise regression examined the association of demographic	FALSE
ArrayExpress	S-EPMC8726715	Modulating FKBP5/FKBP51 and autophagy lowers HTT (huntingtin) levels.	: bafilomycin A<sub>1</sub>; BCA: bicinchoninic acid; BBB: blood brain barrier; BSA: bovine serum albumin; CoIP: co-immunoprecipitation; DMSO: dimethyl sulfoxide; DTT: dithiothreitol; FKBPs: FK506 binding proteins; HD: Huntington disease; HTT: huntingtin; iPSC: induced pluripotent stem cells; MAP1LC3/LC3	FALSE
ArrayExpress	S-EPMC11775147	Cognitive reserve is associated with education, social determinants, and cognitive outcomes among older American Indians in the Strong Heart Study.	& Human Services | NIH | National Heart, Lung, and Blood Institute (NHLBI) R01HL093086 NHLBI NIH HHS U01 HL065521 NHLBI NIH HHS 75N92019D00029 NHLBI NIH HHS 75N92019D00030 NIA NIH HHS P30 AG066509 NHLBI NIH HHS R01 HL093086 NHLBI NIH HHS R01 HL109284 U.S. Department of Health & Human Services | NIH	FALSE
ArrayExpress	S-EPMC7408149	Changes in Metabolites During an Oral Glucose Tolerance Test in Early and Mid-Pregnancy: Findings from the PEARLS Randomized, Controlled Lifestyle Trial.	. These findings provide preliminary insight into metabolites, whose role in increased insulin resistance during pregnancy, should be explored further in future studies. Eunice Kennedy Shriver National Institute of Child Health and Human Development U01 HD072834 National Heart, Lung, and Blood	FALSE
ArrayExpress	S-EPMC9623595	Meta-analysis of epigenome-wide association studies in newborns and children show widespread sex differences in blood DNA methylation.	S-EPMC9623595 PMC9623595 Meta-analysis of epigenome-wide association studies in newborns and children show widespread sex differences in blood DNA methylation. <h4>Background</h4>Among children, sex-specific differences in disease prevalence, age of onset, and susceptibility have been observed	FALSE
ArrayExpress	S-EPMC11385583	Genome-wide association study meta-analysis of neurofilament light (NfL) levels in blood reveals novel loci related to neurodegeneration.	S-EPMC11385583 PMC11385583 Genome-wide association study meta-analysis of neurofilament light (NfL) levels in blood reveals novel loci related to neurodegeneration. Neurofilament light chain (NfL) levels in circulation have been established as a sensitive biomarker of neuro-axonal damage across	FALSE
ArrayExpress	S-EPMC10174328	Contribution of adipocyte Na/K-ATPase Î±1/CD36 signaling induced exosome secretion in response to oxidized LDL.	are stimulated to secrete exosomes under those conditions remain poorly understood.<h4>Methods</h4>Mouse and human <i>in vitro</i> cell culture models were used for performing various cellular and molecular studies on adipocytes and macrophages. Statistical analysis was performed using Student's t-test	FALSE
ArrayExpress	S-EPMC5553685	Agonists of epoxyeicosatrienoic acids reduce infarct size and ameliorate cardiac dysfunction via activation of HO-1 and Wnt1 canonical pathway.	implicate Wnt1 signaling in the formation of new blood vessels. Epoxyeicosatrienoic acids (EETs)-mediated up-regulation of heme oxygenase-1 (HO-1) protects against the detrimental consequences of MI in several animal models, however, the mechanism(s) by which this occurs remains unclear. The aim	FALSE
ArrayExpress	S-EPMC10369801	Three dimensional evaluation of cerebrovascular density and branching in chronic traumatic encephalopathy.	accumulations of hyperphosphorylated tau protein (p-tau) at the depths of the cortical sulci. Studies of living athletes exposed to RHI, including concussive and nonconcussive impacts, have shown increased blood-brain barrier permeability, reduced cerebral blood flow, and alterations in vasoreactivity	FALSE
ArrayExpress	S-EPMC5464608	An indicator cell assay for blood-based diagnostics.	on their innate ability to integrate and respond to diverse signals present in patients' blood. To develop an assay, indicator cells are exposed in vitro to serum from case or control subjects and their global differential response patterns are used to train reliable, disease classifiers based on a small	FALSE
ArrayExpress	S-EPMC11220145	Somatic CAG repeat instability in intermediate alleles of the HTT gene and its potential association with a clinical phenotype.	S-EPMC11220145 PMC11220145 Somatic CAG repeat instability in intermediate alleles of the HTT gene and its potential association with a clinical phenotype. Huntington disease (HD) is a neurodegenerative disorder caused by â‰¥36 CAGs in the HTT gene. Intermediate alleles (IAs) (27-35 CAGs	Maybe
ArrayExpress	S-EPMC5090125	Epigenetic DNA Methylation Profiling with MSRE: A Quantitative NGS Approach Using a Parkinson's Disease Test Case.	S-EPMC5090125 PMC5090125 Epigenetic DNA Methylation Profiling with MSRE: A Quantitative NGS Approach Using a Parkinson's Disease Test Case. Epigenetics is a rapidly developing field focused on deciphering chemical fingerprints that accumulate on human genomes over time. As the nascent idea	FALSE
ArrayExpress	S-EPMC6335099	Blood-Brain Barrier: From Physiology to Disease and Back.	S-EPMC6335099 PMC6335099 Blood-Brain Barrier: From Physiology to Disease and Back. The blood-brain barrier (BBB) prevents neurotoxic plasma components, blood cells, and pathogens from entering the brain. At the same time, the BBB regulates transport of molecules into and out of the central nervous	FALSE
ArrayExpress	S-EPMC5310119	SMAD transcription factors are altered in cell models of HD and regulate HTT expression.	S-EPMC5310119 PMC5310119 SMAD transcription factors are altered in cell models of HD and regulate HTT expression. Transcriptional dysregulation is observable in multiple animal and cell models of Huntington's disease, as well as in human blood and post-mortem caudate. This contributes to HD	TRUE
ArrayExpress	S-EPMC9862929	Therapeutic and Toxic Effects of Valproic Acid Metabolites.	of disease-modifying therapy for multiple tumors, neurodegenerative diseases (Huntington's disease, Parkinson's disease, Duchenne progressive dystrophy, etc.), and human immunodeficiency syndrome. The metabolism of VPA is complex and continues to be studied. Known pathways of VPA metabolism include: Î²-oxidation	FALSE
ArrayExpress	S-EPMC5025259	Glycogen Synthase Kinase 3Î² Promotes the Endocytosis of Transferrin in the African Trypanosome.	S-EPMC5025259 PMC5025259 Glycogen Synthase Kinase 3Î² Promotes the Endocytosis of Transferrin in the African Trypanosome. Human parasite Trypanosoma brucei proliferates in the blood of its host, where it takes up iron via receptor-mediated endocytosis of transferrin (Tf). Mechanisms of Tf	FALSE
ArrayExpress	S-EPMC3789665	Alterations of red cell membrane properties in neuroacanthocytosis.	S-EPMC3789665 PMC3789665 Alterations of red cell membrane properties in neuroacanthocytosis. Neuroacanthocytosis (NA) refers to a group of heterogenous, rare genetic disorders, namely chorea acanthocytosis (ChAc), McLeod syndrome (MLS), Huntington's disease-like 2 (HDL2) and pantothenate kinase	FALSE
ArrayExpress	S-EPMC6173610	High school cigarette smoking and post-secondary education enrollment: Longitudinal findings from the NEXT Generation Health Study.	Resources and Services Administration (HRSA) National Heart, Lung and Blood Institute Intramural NIH HHS ZIA MD000006-02 Intramural Research Program of the Eunice Kennedy Shriver National Institute of Child Health and Human Development HHSN275201200001I Preventive medicine 105 250-256 2017 Dec DOI	FALSE
ArrayExpress	S-EPMC4230994	CYP2J2 targeting to endothelial cells attenuates adiposity and vascular dysfunction in mice fed a high-fat diet by reprogramming adipocyte phenotype.	be prevented by endothelial-specific targeting of the human CYP epoxygenase, CYP2J2. Tie2-CYP2J2 transgenic mice, fed a high-fat diet, had a reduction in body weight gain, blood glucose, insulin levels, and inflammatory markers. Tie2-CYP2J2 gene targeting restored HF-mediated decreases in vascular heme	FALSE
ArrayExpress	S-EPMC6345504	CD36 Enhances Vascular Smooth Muscle Cell Proliferation and Development of Neointimal Hyperplasia.	and thrombosis. We hypothesize that CD36 regulates VSMC proliferation and contributes to the development of obstructive vascular diseases. Approach and Results- We found by immunofluorescent staining that CD36 was highly expressed in human vessels with obstructive diseases. Using guidewire-induced	FALSE
ArrayExpress	S-EPMC9236625	Perceived effectiveness of added-sugar warning label designs for U.S. restaurant menus: An online randomized controlled trial.	Institute of Diabetes and Digestive and Kidney Diseases NHLBI NIH HHS K01 HL147713 National Heart Lung and Blood Institute Preventive medicine 160 107090 2022 Jul DOI DOI PMC PMID Sigala DM o1 Hall MG o2 Musicus AA o3 Roberto CA o4 Solar SE o5 Fan S o6 Sorscher S o7 Nara D o8 Falbe J 0000-0002-8405-4326	FALSE
ArrayExpress	S-EPMC3218844	A global transcriptional analysis of Plasmodium falciparum malaria reveals a novel family of telomere-associated lncRNAs.	genome. We identified 872 protein-coding genes and 60 putative P. falciparum lncRNAs under developmental regulation during the parasite's pathogenic human blood stage. Further characterization of lncRNA candidates led to the discovery of an intriguing family of lncRNA telomere-associated repetitive	FALSE
ArrayExpress	S-EPMC5789891	Gimap5-dependent inactivation of GSK3Î² is required for CD4<sup>+</sup> T cell homeostasis and prevention of immune pathology.	immunopathology in mice. Finally, we show that a human patient with a GIMAP5 loss-of-function mutation has lymphopenia and impaired T cell proliferation in vitro that can be rescued with GSK3 inhibitors. Given that the expression of Gimap5 is lymphocyte-restricted, we propose that its control	FALSE
ArrayExpress	S-EPMC4882035	Fluorogenic Substrates for Visualizing Acidic Organelle Enzyme Activities.	of cells derived from blood and skin samples of patients with Metachromatic Leukodystrophy, Krabbe and Gaucher Diseases as well as healthy human fibroblast and leukocyte control cells exhibited localization to the lysosome when compared with known lysosomal stain LysoTrackerÂ® Red DND-99 as well	FALSE
ArrayExpress	S-EPMC3136408	Serum PCB levels and congener profiles among teachers in PCB-containing schools: a pilot study.	of human exposure is not well-characterized, however. This research compared the serum PCB concentrations, and congener profiles between 18 teachers in PCB-containing schools and referent populations.<h4>Methods</h4>Blood samples from 18 teachers in PCB-containing schools were analyzed for 57 PCB	FALSE
ArrayExpress	S-EPMC9236625	Perceived effectiveness of added-sugar warning label designs for U.S. restaurant menus: An online randomized controlled trial.	Institute of Diabetes and Digestive and Kidney Diseases NHLBI NIH HHS K01 HL147713 National Heart Lung and Blood Institute Preventive medicine 160 107090 2022 Jul DOI DOI PMC PMID Sigala DM o1 Hall MG o2 Musicus AA o3 Roberto CA o4 Solar SE o5 Fan S o6 Sorscher S o7 Nara D o8 Falbe J 0000-0002-8405-4326	FALSE
ArrayExpress	S-EPMC6650348	The Role of Pharmacy Refill Measures in Assessing Adherence and Predicting HIV Disease Markers in Youth with Perinatally-Acquired HIV (PHIV).	Institute of Child Health and Human Development HD052102 / HD052104 NIMH NIH HHS R01 MH084794 NICHD NIH HHS U01 HD052102 NICHD NIH HHS U01 HD052104 National Institute of Mental Health MH084794 Eunice Kennedy Shriver National Institute of Child Health and Human Development (US) HD052102 / HD052104 AIDS	FALSE
ArrayExpress	S-EPMC6913883	Longitudinal associations of neighborhood socioeconomic status with cardiovascular risk factors: A 46-year follow-up study.	to evaluate associations of NSES across the life-course with systolic blood pressure, diastolic blood pressure and body mass index (BMI) in adulthood, adjusting for age, sex, race/ethnicity, mother's race, individual SES, and parental SES.<h4>Results</h4>In fully adjusted models, one standard	FALSE
ArrayExpress	S-EPMC6614138	Antisense Transcription in Loci Associated to Hereditary Neurodegenerative Diseases.	associated to hereditary Alzheimer's disease, Frontotemporal Dementia, Parkinson's disease, Amyotrophic Lateral Sclerosis, and Huntington's disease. We focused our analysis on libraries derived from brain tissues and primary cells. We also screened libraries from total blood and blood cell populations	FALSE
ArrayExpress	S-EPMC11416711	Developing a transwell millifluidic device for studying blood-brain barrier endothelium.	used the device to examine the impact of primary human pericytes and astrocytes on human brain microvascular EC (HBMEC) barrier integrity. Astrocytes, pericytes, and a 1-to-1 ratio of both cell types increased HBMEC barrier integrity <i>via</i> reduced 3 and 40 kDa fluorescent dextran permeability	FALSE
ArrayExpress	S-EPMC3700827	A panel study of occupational exposure to fine particulate matter and changes in DNA methylation over a single workday and years worked in boilermaker welders.	Center of Molecular and Genetic Epidemiology, Department of Environmental and Occupational Health, University of Milan, Milan, Italy Harvard School of Public Health, Huntington Avenue, Boston, MA 02115, USA Oregon State University, College of Public Health and Human Sciences, Milam, Corvallis, OR 97331	FALSE
ArrayExpress	S-EPMC7798340	Circular RNAs in body fluids as cancer biomarkers: the new frontier of liquid biopsies.	S-EPMC7798340 PMC7798340 Circular RNAs in body fluids as cancer biomarkers: the new frontier of liquid biopsies. Cancer is a leading cause of death worldwide, particularly because of its high mortality rate in patients who are diagnosed at late stages. Conventional biomarkers originating from blood	FALSE
ArrayExpress	S-EPMC10439498	Identification of genomic biomarkers and their pathway crosstalks for deciphering mechanistic links in glioblastoma.	the disease. Also, contrary to the tumour biopsies, liquid biopsies are non-invasive and can be performed at any interval during the disease span to surveil the disease. Therefore, in this study, a unique dataset of blood-based liquid biopsies obtained primarily from tumour-educated blood platelets	FALSE
ArrayExpress	S-EPMC6451770	Does pregnancy complication history improve cardiovascular disease risk prediction? Findings from the HUNT study in Norway.	National Heart, Lung, and Blood Institute Medical Research Council MC_UU_12013/9 MRC MC_UU_12013/9 National Institute of Child Health and Human Development Medical Research Council MC_UU_12013/5 Swedish Research Council International Postdoc Grant 2014-6790 National Institutes of Health Ruth L	FALSE
ArrayExpress	S-EPMC3101419	Aminoindoles, a novel scaffold with potent activity against Plasmodium falciparum.	, no parasites were detected on day 4 postinfection. However, parasites recrudesced by day 9. Dosing at 200 mg/kg/day twice a day resulted in cures of 3/5 animals. The compound had comparable activity against P. falciparum blood stages in a human-engrafted NOD-scid mouse model. Genz-668764 had	FALSE
ArrayExpress	E-GEOD-23834	Recurrent disruption of HIP1 identified in patients with epilepsy, learning difficulties, intellectual disability, and neurobehavioral abnormalities	" OR "GSM587553_2010-07-22A01_19-41_7q_Area1_635.pair" OR "GSM587553_2010-07-22A01_19-41_7q_Area1_532.pair" Homo sapiens blood normal epilepsy, learning difficulties, intellectual disability, and neurobehavioral abnormalities epilepsy, learning difficulties, intellectual disability	FALSE
ArrayExpress	E-TABM-185	hgu133a integrated dataset	.cel" OR "494754935.cel" null fibroblast null null null connective tissue 3 "494754979.cel" OR "494755023.cel" OR "494755067.cel" null CD34+lin- null null null umbilical cord blood 2 "502392869.cel" OR "502393013.cel" null pro-B-cells null null null bone marrow 1 "502393129.cel" null pre-B-I cells	FALSE
ArrayExpress	S-EPMC4309995	In utero arsenic exposure and fetal immune repertoire in a US pregnancy cohort.	S-EPMC4309995 PMC4309995 In utero arsenic exposure and fetal immune repertoire in a US pregnancy cohort. Arsenic has wide-ranging effects on human health and there is evidence that it alters the immune response by influencing CD4+/CD8+ T cell ratios, IL-2 cytokine levels, and the expression	FALSE
ArrayExpress	S-EPMC9259573	Noninvasive prenatal diagnosis of genetic diseases induced by triplet repeat expansion by linked read haplotyping and Bayesian approach.	linked-read sequencing was smoothly performed using blood samples from families with Huntington's disease or myotonic dystrophy type 1. The Bayesian analysis of transmission of parental haplotypes allowed defining the genotype of five fetuses. The predicted variant status of four of these fetuses	TRUE
ArrayExpress	S-EPMC4516141	Directional dominance on stature and cognition inÂ diverse human populations.	S-EPMC4516141 PMC4516141 Directional dominance on stature and cognition inÂ diverse human populations. Homozygosity has long been associated with rare, often devastating, Mendelian disorders, and Darwin was one of the first to recognize that inbreeding reduces evolutionary fitness. However	FALSE
ArrayExpress	S-EPMC10333277	Genome-wide association analysis and Mendelian randomization proteomics identify drug targets for heart failure.	million control individuals of European ancestry to uncover novel genetic determinants for heart failure. Using the GWAS results and blood protein quantitative loci, we perform Mendelian randomization and colocalization analyses on human proteins to provide putative causal evidence for the role	FALSE
ArrayExpress	S-EPMC7048086	The landscape of cardiovascular care in pediatric cancer patients and survivors: a survey by the ACC Pediatric Cardio-Oncology Work Group.	post-treatment counseling, common cardiovascular risk-factors like blood pressure (31,48%), lipid control (22,34%), obesity & smoking (30,46%) and diet/exercise/weight loss (30,46%) were addressed by fewer respondents than was LV function (72%).<h4>Conclusions</h4>The survey data demonstrates	FALSE
ArrayExpress	S-EPMC9793579	Implicating genes, pleiotropy, and sexual dimorphism at blood lipid loci through multi-ancestry meta-analysis.	S-EPMC9793579 PMC9793579 Implicating genes, pleiotropy, and sexual dimorphism at blood lipid loci through multi-ancestry meta-analysis. <h4>Background</h4>Genetic variants within nearly 1000 loci are known to contribute to modulation of blood lipid levels. However, the biological pathways	FALSE
ArrayExpress	E-GEOD-64887	Expression data from Plasmodium falciparum schizonts	Parasites were maintained in O+ blood at 4% hematocrit in RPMI-1640 media supplemented with 10% human serum. Cultures were kept at 37M-0C in a chamber containing mixed gas (5% CO2, 5% O2, 90% N2). P-GSE64887-4 nucleic acid extraction protocol Flow sorted cells were transferred directly into RNA lysis	FALSE
ArrayExpress	S-EPMC5745211	The Oxygen Paradox, the French Paradox, and age-related diseases.	on the etiology, progression, and outcomes of many of the major human age-related diseases, as well as the basic biological phenomenon of ageing itself. NIA NIH HHS # AG058068 NIEHS NIH HHS #D43ES022862 NIEHS NIH HHS #ES023864 National Heart, Lung, and Blood Institute #U01HL122681 NIEHS NIH HHS R01 ES003598	FALSE
ArrayExpress	S-EPMC3484648	Discovery and fine mapping of serum protein loci through transethnic meta-analysis.	concentrations and their association with human disease. Wellcome Trust 098017 PHS HHS AHA0675001N Biotechnology and Biological Sciences Research Council BB/F019394/1 Medical Research Council G0700704 NCATS NIH HHS UL1 TR000124 Wellcome Trust WT081682 Chief Scientist Office CZB/4/710 Medical Research	FALSE
ArrayExpress	E-GEOD-71220	The effect of statins on blood gene expression in COPD	E-GEOD-71220 The effect of statins on blood gene expression in COPD transcription profiling by array EFO EFO_0002768 Homo sapiens Background: COPD is currently the fourth leading cause of death worldwide and predicted to rank third by 2020. Statins are commonly used lipid lowering agents	FALSE
ArrayExpress	S-EPMC3607468	Integration of genome-wide association studies with biological knowledge identifies six novel genes related to kidney function.	_U127561128 Medical Research Council MC_U127561128 NHLBI NIH HHS T32 HL007575 NHLBI NIH HHS R01 HL043851 Human molecular genetics 21(24) 5329-43 2012 Dec DOI DOI PMC PMID Chasman DI o1 Fuchsberger C 0000-0002-5918-8947 o2 Pattaro C o3 Teumer A 0000-0002-8309-094X o4 Boger CA o5 Endlich K	FALSE
ArrayExpress	S-EPMC9388392	A multi-layer functional genomic analysis to understand noncoding genetic variation in lipids.	S-EPMC9388392 PMC9388392 A multi-layer functional genomic analysis to understand noncoding genetic variation in lipids. A major challenge of genome-wide association studies (GWASs) is to translate phenotypic associations into biological insights. Here, we integrate a large GWAS on blood lipids	FALSE
ArrayExpress	E-MTAB-1425	Transcription profiling by array of human lymphoblastoid cell lines derived from 400 children from families recruited through a proband with asthma	E-MTAB-1425 Transcription profiling by array of human lymphoblastoid cell lines derived from 400 children from families recruited through a proband with asthma transcription profiling by array EFO EFO_0002768 Homo sapiens We have created a global map of the effects of polymorphism on gene	FALSE
ArrayExpress	S-EPMC4165626	Global, regional, and national levels of neonatal, infant, and under-5 mortality during 1990-2013: a systematic analysis for the Global Burden of Disease Study 2013.	Research and Implementation Science (CTRIS), National Heart, Lung, and Blood Institute, Bethesda, MD, USA. Centre Hospitalier Nord Deux-Sevres, Bressuire, France. Centre for Chronic Disease Control, New Delhi, Delhi, India. Centre of Research in Environmental Epidemiology (CREAL), Barcelona, Spain	FALSE
ArrayExpress	S-EPMC7614570	Global burden of chronic respiratory diseases and risk factors, 1990-2019: an update from the Global Burden of Disease Study 2019.	, India; School of Public Health All India Institute of Medical Sciences, Jodhpur, India. Department of Comprehensive Nursing Arba Minch University, Arba Minch, Ethiopia. Department of Computer Science Boston University, Boston, MA, USA. Department of Computer Science University of Human Development	FALSE
ArrayExpress	S-EPMC11447278	Forecasting the effects of smoking prevalence scenarios on years of life lost and life expectancy from 2022 to 2050: a systematic analysis for the Global Burden of Disease Study 2021.	Samodra YL o770 Samy AM o771 Sanabria J o772 Santric-Milicevic MM o773 Sao Jose BP o774 Saqib MAN o775 Sarasmita MA o776 Saravanan A o777 Saravi B o778 Sarikhani Y o779 Sarkar T o780 Sarode GS o781 Sarode SC o781 Sartorius B o782 Sathian B o783 Sathyanarayan A o252 Satpathy M o784 Sawhney M o785 Saylan	FALSE
ArrayExpress	S-EPMC8719276	Cancer Incidence, Mortality, Years of Life Lost, Years Lived With Disability, and Disability-Adjusted Life Years for 29 Cancer Groups From 2010 to 2019: A Systematic Analysis for the Global Burden of Disease Study 2019.	. Department of Epidemiology, Human Genetics and Environmental Sciences, The University of Texas Health Science Center at Houston School of Public Health, Dallas. Department of Epidemiology, Human Genetics, and Environmental Sciences, University of Texas Health Science Center at Houston, Houston	FALSE
ArrayExpress	S-EPMC7615984	Global Burden of Cardiovascular Diseases and Risks, 1990-2022.	Research Center, Scotland's Rural College (SRUC), Edinburgh, UK. Biostatics, Epidemiology, and Science Computing Department, King Faisal Specialist Hospital & Research Center, Riyadh, Saudi Arabia. Blood and Marrow Transplantation and Cellular Therapy Program, Stanford University, Palo Alto, CA	FALSE
ArrayExpress	E-MTAB-1428	Transcription profiling by array of 550 children from families recruited through a proband with atopic dermatitis	E-MTAB-1428 Transcription profiling by array of 550 children from families recruited through a proband with atopic dermatitis transcription profiling by array EFO EFO_0002768 Homo sapiens We have created a global map of the effects of polymorphism on gene expression in 550 children from families	FALSE

## Sheet: ArrayExpressAPIFilter
Repo	Id	Name	Description	Validation
ArrayExpress	E-GEOD-1751	Human blood expression for Huntington's disease versus control	E-GEOD-1751 Human blood expression for Huntington's disease versus control transcription profiling by array EFO EFO_0002768 Homo sapiens Affymetrix U133A expression levels for 12 symptomatic and 5 presymptomatic Huntington's disease patients versus 14 healthy controls. Keywords: other P-GSE1751-1	TRUE
ArrayExpress	E-MTAB-14696	RNA-seq Analysis in Huntington's disease (HD) peripheral blood mononuclear cell samples	E-MTAB-14696 RNA-seq Analysis in Huntington's disease (HD) peripheral blood mononuclear cell samples RNA-seq of coding RNA EFO EFO_0003738 Homo sapiens Huntington's disease (HD) is an autosomal dominant neurodegenerative disease caused by the expansion of the CAG nucleotide repeat in the first exon	TRUE
ArrayExpress	E-GEOD-24250	The transcriptional modulator H2AFY marks Huntington's disease activity in men and mice	E-GEOD-24250 The transcriptional modulator H2AFY marks Huntington's disease activity in men and mice transcription profiling by array EFO EFO_0002768 Homo sapiens To accelerate the development of disease-modifying therapeutics for Huntingtonâ€™s disease (HD), a dynamic biomarker of disease activity	Maybe
ArrayExpress	E-GEOD-51799	Huntington's disease biomarker progression profile identified by transcriptome sequencing in peripheral blood	E-GEOD-51799 Huntington's disease biomarker progression profile identified by transcriptome sequencing in peripheral blood RNA-seq of coding RNA EFO EFO_0003738 Homo sapiens In this study we investigated the suitability of blood to identify HD transcriptomic biomarkers, validated the outcome	TRUE
ArrayExpress	E-GEOD-54670	Illumina Infinium HumanMethylation450 data for human whole blood samples and for mixtures of purified white blood cells reconstructing human blood	E-GEOD-54670 Illumina Infinium HumanMethylation450 data for human whole blood samples and for mixtures of purified white blood cells reconstructing human blood methylation profiling by array EFO EFO_0002759 Homo sapiens The objective of the study was to utilize DNA methylation to quantify human	TRUE
ArrayExpress	E-GEOD-79064	DNA methylation profiling in human Huntington's Disease brain	E-GEOD-79064 DNA methylation profiling in human Huntington's Disease brain methylation profiling by array EFO EFO_0002759 Homo sapiens Despite extensive progress in HuntingtonÃ¢??s Disease (HD) research, very little is known about the association of epigenetic variation and HD pathogenesis in human	TRUE
ArrayExpress	S-SCDT-10_1038-S44321-023-00020-Y	Lowering mutant huntingtin by small molecules relieves Huntington's disease symptoms and progression	.obolibrary.org/obo/OBI_0001418 dose response design OBI HTT assayed protein 9606 P42858 https://www.uniprot.org/uniprot/P42858 HTT Uniprot patient component organism None 9606 http://www.ncbi.nlm.nih.gov/taxonomy/9606 Homo sapiens NCBI taxon SPI-77,SPI-24 intervention molecule None None null None None HD	FALSE
ArrayExpress	E-GEOD-8762	Lymphocyte gene expression data from moderate stage HD patients and controls	"GSM217772.CEL" OR "GSM217771.CEL" OR "GSM217770.CEL" OR "GSM217769.CEL" OR "GSM217768.CEL" OR "GSM217767.CEL" OR "GSM217766.CEL" Homo sapiens blood lymphocyte female male 60 year 46 year 38 year 42 year 62 year 30 year 44 year 43 year 41 year 68 year 55 year 50 year 51 year 56 year 61 year ... 3 other	TRUE
ArrayExpress	E-GEOD-55468	Genome-wide analysis of gene expression variation in CD4+ T cells from patients with active rheumatoid arthritis (RA).	E-GEOD-55468 Genome-wide analysis of gene expression variation in CD4+ T cells from patients with active rheumatoid arthritis (RA). transcription profiling by array EFO EFO_0002768 Homo sapiens Analysis of the regulatory architecture of gene expression variation in CD4+ T cells from patients	FALSE
ArrayExpress	E-GEOD-54647	VeraCode GoldenGate Methylation Assay microarray data for purified human leukocytes, reconstruction mixtures and human whole blood samples	E-GEOD-54647 VeraCode GoldenGate Methylation Assay microarray data for purified human leukocytes, reconstruction mixtures and human whole blood samples methylation profiling by array EFO EFO_0002759 Homo sapiens The objective of the study was to utilize DNA methylation to quantify human leukocyte	FALSE
ArrayExpress	E-GEOD-29678	Expression profiling of human peripheral blood before and after omega 3 dietary supplement.	E-GEOD-29678 Expression profiling of human peripheral blood before and after omega 3 dietary supplement. transcription profiling by array EFO EFO_0002768 Homo sapiens Patients with early stage CLL were recruited into the study and administered a course of omega 3 dietary supplements. Expression	FALSE
ArrayExpress	E-GEOD-56298	Allele-Specific Methylation Occurs at Genetic Variants Associated with Complex Disease	,SRS583426,SRS583427,SRS583431,SRS583433,SRS583435,SRS583436,SRS583437,SRS583438,SRS583439,SRS583440,SRS583441,SRS583443,SRS583444,SRS583445,SRS583446,SRS583448,SRS583449,SRS583453,SRS583454,SRS583458 Not Hispanic Homo sapiens whole blood White female male female 42 https://www.ebi.ac.uk/ena/browser	FALSE
ArrayExpress	E-GEOD-54671	Quantitative reconstruction of leukocyte subsets using DNA methylation	subtype 5 Citrate, Fresh Human whole blood 6 B-Cells Purified WBC subtype 5 neutrophils Purified WBC subtype 5 EDTA, Fresh Human whole blood 6 CD4+ T-cells Purified WBC subtype 5 normal Homo sapiens CD16+ NK cells Granuloctyes Heparin, Fresh Citrate, o/n at 4C CD8- NK cells Pan-NK cells basophils	FALSE
ArrayExpress	E-TABM-185	hgu133a integrated dataset	.cel" OR "494754935.cel" null fibroblast null null null connective tissue 3 "494754979.cel" OR "494755023.cel" OR "494755067.cel" null CD34+lin- null null null umbilical cord blood 2 "502392869.cel" OR "502393013.cel" null pro-B-cells null null null bone marrow 1 "502393129.cel" null pre-B-I cells	FALSE
ArrayExpress	E-GEOD-23834	Recurrent disruption of HIP1 identified in patients with epilepsy, learning difficulties, intellectual disability, and neurobehavioral abnormalities	" OR "GSM587553_2010-07-22A01_19-41_7q_Area1_635.pair" OR "GSM587553_2010-07-22A01_19-41_7q_Area1_532.pair" Homo sapiens blood normal epilepsy, learning difficulties, intellectual disability, and neurobehavioral abnormalities epilepsy, learning difficulties, intellectual disability	FALSE
ArrayExpress	E-MTAB-3732	A comprehensive human expression map	E-MTAB-3732 A comprehensive human expression map transcription profiling by array EFO EFO_0002768 Homo sapiens A compiled human gene expression, ontology-annotated dataset from publicly available data including 27887 Affymetrix HG-U133Plus2 arrays, filtered for quality control. The dataset contains	FALSE
ArrayExpress	E-GEOD-71220	The effect of statins on blood gene expression in COPD	E-GEOD-71220 The effect of statins on blood gene expression in COPD transcription profiling by array EFO EFO_0002768 Homo sapiens Background: COPD is currently the fourth leading cause of death worldwide and predicted to rank third by 2020. Statins are commonly used lipid lowering agents	FALSE
ArrayExpress	E-MEXP-3420	Simultaneous quantification of multiple bacteria by the BactoChip microarray designed to target species-specific marker genes	_extraction MGED Ontology High-purity total bacterial DNA was extracted with silica-based DNA purification QIAGEN DNeasy Blood&amp;Tissue kit (QIAGEN GmbH, Hilden, Germany) and eluted in 200 ml sterile distilled water. (Parameters: Extracted product = genomic_DNA, Amplification = none) Nicola Segata nicola	FALSE
ArrayExpress	E-MTAB-1425	Transcription profiling by array of human lymphoblastoid cell lines derived from 400 children from families recruited through a proband with asthma	E-MTAB-1425 Transcription profiling by array of human lymphoblastoid cell lines derived from 400 children from families recruited through a proband with asthma transcription profiling by array EFO EFO_0002768 Homo sapiens We have created a global map of the effects of polymorphism on gene	FALSE
ArrayExpress	E-MTAB-1428	Transcription profiling by array of 550 children from families recruited through a proband with atopic dermatitis	E-MTAB-1428 Transcription profiling by array of 550 children from families recruited through a proband with atopic dermatitis transcription profiling by array EFO EFO_0002768 Homo sapiens We have created a global map of the effects of polymorphism on gene expression in 550 children from families	FALSE

## Sheet: DbGaPAPIFreeText
Repo	Id	Name	Organism	Description	Validation
DbGaP-SRA	NA	NA	NA	NA	FALSE
DbGaP-SRA	NA	NA	NA	NA	FALSE
DbGaP-SRA	SRP043005	Homo sapiens Genome sequencing and physical haplotyping	Homo sapiens	NA	FALSE
DbGaP-SRA	SRP045871	Agalychnis callidryas Transcriptome	Agalychnis callidryas	NA	FALSE
DbGaP-SRA	SRP034961	Spodoptera exigua Transcriptome or Gene expression	Spodoptera exigua	NA	FALSE
DbGaP-SRA	NA	NA	NA	NA	FALSE
DbGaP-SRA	ERP001446	Population_structure_of_a_very_early_branching_Staphylococcus_aureus_lineage	Staphylococcus aureus	NA	FALSE
DbGaP-SRA	ERP001446	Population_structure_of_a_very_early_branching_Staphylococcus_aureus_lineage	Staphylococcus aureus	NA	FALSE
DbGaP-SRA	ERP001446	Population_structure_of_a_very_early_branching_Staphylococcus_aureus_lineage	Staphylococcus aureus	NA	FALSE
DbGaP-SRA	ERP001446	Population_structure_of_a_very_early_branching_Staphylococcus_aureus_lineage	Staphylococcus aureus	NA	FALSE
DbGaP-SRA	ERP001446	Population_structure_of_a_very_early_branching_Staphylococcus_aureus_lineage	Staphylococcus aureus	NA	FALSE
DbGaP-SRA	ERP001446	Population_structure_of_a_very_early_branching_Staphylococcus_aureus_lineage	Staphylococcus aureus	NA	FALSE
DbGaP-SRA	ERP001446	Population_structure_of_a_very_early_branching_Staphylococcus_aureus_lineage	Staphylococcus aureus	NA	FALSE
DbGaP-SRA	SRP025003	Pontibacillus marinus DSM 16465	Pontibacillus marinus BH030004 = DSM 16465	NA	FALSE
DbGaP-SRA	SRP002163	Human Microbiome Project (HMP) Metagenomic WGS Projects, deeper sequencing of the human microbiome samples: Production Phase	human metagenome	NA	FALSE
DbGaP-SRA	SRP002163	Human Microbiome Project (HMP) Metagenomic WGS Projects, deeper sequencing of the human microbiome samples: Production Phase	human metagenome	NA	FALSE
DbGaP-SRA	SRP002163	Human Microbiome Project (HMP) Metagenomic WGS Projects, deeper sequencing of the human microbiome samples: Production Phase	human metagenome	NA	FALSE
DbGaP-SRA	SRP002163	Human Microbiome Project (HMP) Metagenomic WGS Projects, deeper sequencing of the human microbiome samples: Production Phase	human metagenome	NA	FALSE
DbGaP-SRA	SRP007508	The human mitochondrial transcriptome	Homo sapiens	NA	FALSE
DbGaP-SRA	SRP007490	Chromatin maps of mature T cells	Mus musculus	NA	FALSE
DbGaP-SRA	SRP000097	The Chicken Genome Project, currently maintained by the Genome Reference Consortium (GRC)	Gallus gallus	NA	FALSE

## Sheet: DbGaPAPIFilter
Repo	Id	Name	Organism	Description	Validation
DbGaP-SRA	SRX1196191	NA	NA	NA	FALSE

## Sheet: GEOAPIFreeText
Repo	Id	Name	Organism	Description	Validation
GEO	200296451	UBE2F inhibits Natural Killer cell tumor immunity by activating the ARIH2-CRL5 complex to degrade interleukin 15 receptors	Homo sapiens	Interleukin-15 receptor (IL-15R) agonists induce anti-tumor immunity in pre-clinical models, however, dose-limiting toxicity has hampered their clinical development. An alternative is to target pathways downstream of the IL-15R to access different therapeutic profiles. We performed genome-wide CRISPR screens to reveal the complete IL15R signaling mechanism in NK cells and discovered ubiquitin-dep…	FALSE
GEO	200255070	Fingerprint of circulating microRNAs identify acute ischemic stroke patients	synthetic construct; Homo sapiens	Aim of the present study is to identify all circulating miRNAs that are modulated in patients with stroke, to select specific miRNAs to be used as disease biomarkers to improve both diagnosis and prognosis. Background. Stroke is the second-most common cause of death worldwide. The major factor limiting prognosis in patients affected by acute stroke is the very limited therapeutic window, so that …	FALSE
GEO	200261143	Transcriptomic analysis of RNA Granules and Exosomes: Unmasking the Intra- and Intercellular organelle overlap in Huntington's Disease	Homo sapiens	Introduction:Repetitive RNA sequences like CAG repeats that trigger aberrant RNA-protein interactions cause several neurodegenerative diseases including Huntington's disease (HD). Importantly, these aberrant RNA-protein complexes also seed the formation of cytoplasmic liquid-like granules, such as the stress granules. Emerging evidence demonstrates that granules formed via liquid-liquid phase sep…	FALSE
GEO	200267435	Huntingtin is an RNA binding protein and participates in NEAT1-mediated paraspeckles	Homo sapiens	Huntingtin protein, mutated in Huntington disease, is implicated in nucleic acid- mediated processes, yet evidence for direct huntingtin-nucleic acid interaction is limited. Here we show wildtype and mutant huntingtin co-purify with nucleic acids, primarily RNA, and interact directly with G-rich RNAs in in vitro assays. Huntingtin RNA immunoprecipitation sequencing from patient-derived fibroblast…	FALSE
GEO	200222235	DOT1L controls NK cell maturation and lineage integrity	Mus musculus	This SuperSeries is composed of the SubSeries listed below.	FALSE
GEO	200222234	DOT1L controls NK cell maturation and lineage integrity [RNA-seq D5]	Mus musculus	In the innate immune system, natural killer (NK) cells represent a highly important subset of cells with utmost importance in the control of transformed cell and tumour inflammation. Previous studies showed that NK cells can convert into ILC1-like cells in a TGF-Î²-rich tumour microenvironment (TME). In addition, cancer patients with acute myeloid leukemia (AML) or chronic lymphocytic leukemia (C…	FALSE
GEO	200263368	Transcriptomics coupled proteomics reveals the critical signaling pathways regulating OVA antigen-specific CD8+ T cells in mouse spleen and liver	Mus musculus	Background: Antigen-specific T cells are particularly important for eliminating bacterial infection, and the dynamics in this process help uncover the mechanisms by which bacteria are eliminated.Results: In this study, we sorted the antigen-specific CD8+ T cell in the mouse liver and spleen at 5, 7, and 14 days after infection of Listeria monocytogenes expressing the OVA protein, finding that ant…	FALSE
GEO	200222849	Impact of elraglusib (9-ING-41) treatment on gene expression in human colorectal cancer and immune cell lines.	Homo sapiens	A growing body of literature evaluates the potential anti-cancer and immunostimulatory effects of GSK-3 inhibition. Accordingly, we sought to evaluate GSK-3 inhibitor elraglusib (9-ING-41) and its impact on gene expression in both human colorectal cancer (CRC) cell lines and human immune cell lines. We used microarrays to detail the differential gene expression that occurs post-treatment with GSK…	FALSE
GEO	200167630	Circulating non-coding RNAs in Huntington disease	Homo sapiens; synthetic construct	We performed a study of whole non-coding RNA expression profiles, by microarray, in plasma from 9 patients with Huntington disease (CH) in early stage and 13 controls: 8 healthy subjects (HD) and 5 patients with schizophrenia (SC). The CH patients were under antipsychotic drugs, the most effective treatment option also in SC patient (we included in the study SC control group to minimize the impac…	TRUE
GEO	200147004	DNA Methylation Study of Huntington's Disease and Motor Progression in Three Species	Ovis aries; Rattus norvegicus; Homo sapiens; Mus musculus	This SuperSeries is composed of the SubSeries listed below.	FALSE
GEO	200147003	DNA methylation profiles from a transgenic sheep model of Huntington's disease	Mus musculus; Ovis aries; Rattus norvegicus; Homo sapiens	An Infinium microarray platform (HorvathMammalMethylChip40) was used to generate DNA methylation data from n=168 blood samples of a transgenic sheep model of Huntington's disease. 84 transgenic sheep and age matched control sheep.	FALSE
GEO	200147002	DNA methylation profiles from a mouse model of Huntington's disease	Mus musculus; Rattus norvegicus; Homo sapiens	An Infinium microarray platform (HorvathMammalMethylChip40) was used to generate DNA methylation data from mouse tissues of a heterozygous Huntingtin expansion knock-in (Q175) and wildtype (WT) controls. Mouse tissues: blood, liver, brain cortex, brain cerebellum, and striatum.	FALSE
GEO	200098514	Expression profiling of four replicates of MCF-7 cells treated with 100nM TCDD	Homo sapiens	The aryl hydrocarbon receptor (AHR) is a ligand-activated transcription factor that binds pollutants, therapeutic drugs and endogenous ligands. The AHR is expressed in all breast cancer subtypes and it can switch the aggressiveness of breast cancer cells from low to high depending on the ligand that it binds. Jagged 1 (JAG1) is a NOTCH receptor ligand that is overexpressed in basal-like breast ca…	FALSE
GEO	200102045	G-Protein-Coupled Receptor 68 Negatively Regulates IL-22 Production in Human Th17 Cells	Homo sapiens	Purpose: To identify novel genes regulated by the aryl hydrocarbon receptor that influence human Th17 cell function. Methods: NaÃ¯ve CD4 T cells from peripheral blood of six healthy human volunteers were cultured under four experimental conditions for three days: anti-CD3 and anti-CD28 antibodies (Media control), Media with Th17 conditions (IL-6, TGF-b, IL-1b, IL-23), Th17+FICZ and Th17+CH223191.…	FALSE
GEO	200093233	The role and mechanism of erythrocyte invasion by Francisella tularensis	Francisella tularensis	Francisella tularensis, is an extremely virulent bacterium that can be transmitted naturally by blood sucking arthropods. During mammalian infection, F. tularensis infects numerous types of host cells, including erythrocytes. As erythrocytes do not undergo phagocytosis or endocytosis, it remains unknown how F. tularensis invades these cells. Furthermore, the consequence of inhabiting the intracel…	FALSE
GEO	200098515	Expression profiling of MCF-7 cells with treatment of TCDD	Homo sapiens	This SuperSeries is composed of the SubSeries listed below.	FALSE
GEO	200076608	Expression profiling of MCF-7 cells with 10nM treatment of TCDD	Homo sapiens	The aryl hydrocarbon receptor (AHR) is a ligand-activated transcription factor that is regulated by environmental toxicants that function as AHR agonists such as 2,3,7,8 tetrachlorodibenzo-p-dioxin (TCDD). L-Type Amino Acid Transporter 1 (LAT1) is a leucine uptake transporter that is overexpressed in cancer. The regulation of LAT1 by AHR in MCF-7 and MDA-MB-231 breast cancer cells (BCCs) was inve…	FALSE
GEO	200071220	The effect of statins on blood gene expression in COPD	Homo sapiens	Background: COPD is currently the fourth leading cause of death worldwide and predicted to rank third by 2020. Statins are commonly used lipid lowering agents with documented benefits on cardiovascular morbidity and mortality, and have also been shown to have pleiotropic effects including anti-inflammatory and anti-oxidant activity. Objective: Identify a gene signature associated with statin use …	FALSE
GEO	200059660	Expression profiling of WI38 normal lung fibroblasts following overexpression of p53 and/or Retinoblastoma	Homo sapiens	RNA expression profiling was performed on normal human lung fibroblast WI38 cells following overexpression of p53 and pRb, in order to identify genes co-regulated and involved in mediating p53 and pRb tumor suppressor processes.	FALSE
GEO	200063197	Human RORÎ³t+ CD34+ cells are lineage-specified progenitors of group 3 RORÎ³t+ innate lymphoid cells	Homo sapiens	Group 3 innate lymphoid cells (ILC3) are defined by the expression of RORÎ³t, which is selectively required for their development. The lineage-specified progenitor cells of human ILC3 and their developmental site after birth remain undefined. Here we identified a novel population of human CD34+ hematopoietic progenitor cells (HPC) expressing RORÎ³t and sharing with ILC3 a distinct transcriptional…	FALSE
GEO	200029678	Expression profiling of human peripheral blood before and after omega 3 dietary supplement.	Homo sapiens	Patients with early stage CLL were recruited into the study and administered a course of omega 3 dietary supplements. Expression profiling of each patient was performed at baseline (before administering the supplement) and after consumption of supplements. Patients were divided into two groups according to the level of NFkB activation at baseline, and then within each of the two groups significan…	FALSE
GEO	200036081	Effect of GRHL2 in HMLE+Twist-ER+4-OHT cells	Homo sapiens	Grainyhead genes are involved in wound healing and developmental neural tube closure. In light of the high degree of similarity between the epithelial-mesenchymal transitions (EMTs) occurring in wound healing processes and the cancer stem cell-like compartment of tumors, including TGF-Î²-dependence, we investigated the role of a Grainyhead gene (GRHL2) in oncogenic EMT. Grainyhead was specificall…	FALSE
GEO	200032673	E2F7 represses a transcriptional network of oscillating cell cycle genes to control S-phase progression.	Homo sapiens	E2F transcription factors are known to be important for timely activation of G1/S and G2/M genes required for cell cycle progression, but transcriptional mechanisms for deactivation of cell cycle regulated genes are unknown. Here, we show that E2F7 is highly expressed during mid to late S-phase, occupies promoters of G1/S regulated genes and represses its transcription. ChIP-seq analysis revealed…	FALSE
GEO	200017860	Expression profiles of human osteoblasts directly and indirectly damaged by chemotherapy	Homo sapiens	This SuperSeries is composed of the SubSeries listed below.	FALSE
GEO	200017843	Human osteoblast treated with recombinant TGF-beta	Homo sapiens	Global expression profile of human osteoblast treated with recombinant TGF-beta compared to human osteoblast treated with growth media alone	FALSE
GEO	200017842	Human osteoblast treated with chemotherapy-treated bone marrow stromal cell conditioned media	Homo sapiens	Global expression profile of human osteoblast treated with chemotherapy-treated bone marrow stromal cell conditioned media, compared to human osteoblast cells treated with diluent-control bone marrow stromal cell conditioned media. Goal is to identify genes regulated by chemotherapy in osteoblasts.	FALSE
GEO	200017839	Human osteoblast treated with Melphalen	Homo sapiens	Global expression profile of human osteoblast treated with melphalen, compared to human osteoblast cells treated with diluent control	FALSE
GEO	200023834	Recurrent disruption of HIP1 identified in patients with epilepsy, learning difficulties, intellectual disability, and neurobehavioral abnormalities	Homo sapiens	We report 12 individuals from ten unrelated families with epilepsy, learning difficulties, intellectual disability, and neurobehavioral abnormalities, who segregated a microdeletion distally adjacent to the Williams-Beuren syndrome region. In six families, a recurrent ~ 1.1 Mb deletion likely resulted from nonallelic homologous recombination between flanking large complex low-copy repeats. Three …	FALSE
GEO	200005184	PGC1alpha overexpression in human white adipose cells	Homo sapiens	Subcutaneous abdominal adipose tissue was obtained from female subjects undergoing plastic surgery in agreement with French laws on biomedical research. Stromal cells prepared from WAT were cultured for 13 days in a chemically defined medium. At day 13, 60â€“80% of cells were differentiated into lipid droplet-containing adipocytes. The cells were infected at a m.o.i. of 200 for 6 h. The day after…	FALSE
GEO	100001261	[Mouse430_2] Affymetrix Mouse Genome 430 2.0 Array	Mus musculus	Affymetrix submissions are typically submitted to GEO using the GEOarchive method described at http://www.ncbi.nlm.nih.gov/projects/geo/info/geo_affy.html June 03, 2009: annotation table updated with netaffx build 28 June 07, 2012: annotation table updated with netaffx build 32 June 23, 2016: annotation table updated with netaffx build 35 Protocol: see manufacturer's web site All probe sets repre…	FALSE
GEO	305111627	PLASMA-CH-VL-26-06-13	Homo sapiens	PLASMA	Maybe
GEO	305111626	PLASMA-CH-SI-26-06-13	Homo sapiens	PLASMA	Maybe
GEO	305111625	PLASMA-CH-SV-20-06-13	Homo sapiens	PLASMA	Maybe
GEO	305111624	PLASMA-CH-RB-20-06-13	Homo sapiens	PLASMA	Maybe
GEO	305111623	PLASMA-CH-QM-20-06-13	Homo sapiens	PLASMA	Maybe
GEO	305111622	PLASMA-CH-FP-27-06-13	Homo sapiens	PLASMA	Maybe
GEO	305111621	PLASMA-CH-FA-27-06-13	Homo sapiens	PLASMA	Maybe
GEO	305111620	PLASMA-CH-CA-27-06-13	Homo sapiens	PLASMA	Maybe
GEO	305111619	PLASMA-CH-AG-26-06-13	Homo sapiens	PLASMA	Maybe

## Sheet: GEOAPIFilter
Repo	Id	Name	Organism	Description	Validation
GEO	200296451	UBE2F inhibits Natural Killer cell tumor immunity by activating the ARIH2-CRL5 complex to degrade interleukin 15 receptors	Homo sapiens	Interleukin-15 receptor (IL-15R) agonists induce anti-tumor immunity in pre-clinical models, however, dose-limiting toxicity has hampered their clinical development. An alternative is to target pathways downstream of the IL-15R to access different therapeutic profiles. We performed genome-wide CRISPR screens to reveal the complete IL15R signaling mechanism in NK cells and discovered ubiquitin-dep…	FALSE
GEO	200255070	Fingerprint of circulating microRNAs identify acute ischemic stroke patients	synthetic construct; Homo sapiens	Aim of the present study is to identify all circulating miRNAs that are modulated in patients with stroke, to select specific miRNAs to be used as disease biomarkers to improve both diagnosis and prognosis. Background. Stroke is the second-most common cause of death worldwide. The major factor limiting prognosis in patients affected by acute stroke is the very limited therapeutic window, so that …	FALSE
GEO	200261143	Transcriptomic analysis of RNA Granules and Exosomes: Unmasking the Intra- and Intercellular organelle overlap in Huntington's Disease	Homo sapiens	Introduction:Repetitive RNA sequences like CAG repeats that trigger aberrant RNA-protein interactions cause several neurodegenerative diseases including Huntington's disease (HD). Importantly, these aberrant RNA-protein complexes also seed the formation of cytoplasmic liquid-like granules, such as the stress granules. Emerging evidence demonstrates that granules formed via liquid-liquid phase sep…	FALSE
GEO	200267435	Huntingtin is an RNA binding protein and participates in NEAT1-mediated paraspeckles	Homo sapiens	Huntingtin protein, mutated in Huntington disease, is implicated in nucleic acid- mediated processes, yet evidence for direct huntingtin-nucleic acid interaction is limited. Here we show wildtype and mutant huntingtin co-purify with nucleic acids, primarily RNA, and interact directly with G-rich RNAs in in vitro assays. Huntingtin RNA immunoprecipitation sequencing from patient-derived fibroblast…	FALSE
GEO	200222849	Impact of elraglusib (9-ING-41) treatment on gene expression in human colorectal cancer and immune cell lines.	Homo sapiens	A growing body of literature evaluates the potential anti-cancer and immunostimulatory effects of GSK-3 inhibition. Accordingly, we sought to evaluate GSK-3 inhibitor elraglusib (9-ING-41) and its impact on gene expression in both human colorectal cancer (CRC) cell lines and human immune cell lines. We used microarrays to detail the differential gene expression that occurs post-treatment with GSK…	FALSE
GEO	200167630	Circulating non-coding RNAs in Huntington disease	Homo sapiens; synthetic construct	We performed a study of whole non-coding RNA expression profiles, by microarray, in plasma from 9 patients with Huntington disease (CH) in early stage and 13 controls: 8 healthy subjects (HD) and 5 patients with schizophrenia (SC). The CH patients were under antipsychotic drugs, the most effective treatment option also in SC patient (we included in the study SC control group to minimize the impac…	TRUE
GEO	200147004	DNA Methylation Study of Huntington's Disease and Motor Progression in Three Species	Ovis aries; Rattus norvegicus; Homo sapiens; Mus musculus	This SuperSeries is composed of the SubSeries listed below.	FALSE
GEO	200147003	DNA methylation profiles from a transgenic sheep model of Huntington's disease	Mus musculus; Ovis aries; Rattus norvegicus; Homo sapiens	An Infinium microarray platform (HorvathMammalMethylChip40) was used to generate DNA methylation data from n=168 blood samples of a transgenic sheep model of Huntington's disease. 84 transgenic sheep and age matched control sheep.	FALSE
GEO	200147002	DNA methylation profiles from a mouse model of Huntington's disease	Mus musculus; Rattus norvegicus; Homo sapiens	An Infinium microarray platform (HorvathMammalMethylChip40) was used to generate DNA methylation data from mouse tissues of a heterozygous Huntingtin expansion knock-in (Q175) and wildtype (WT) controls. Mouse tissues: blood, liver, brain cortex, brain cerebellum, and striatum.	FALSE
GEO	200098514	Expression profiling of four replicates of MCF-7 cells treated with 100nM TCDD	Homo sapiens	The aryl hydrocarbon receptor (AHR) is a ligand-activated transcription factor that binds pollutants, therapeutic drugs and endogenous ligands. The AHR is expressed in all breast cancer subtypes and it can switch the aggressiveness of breast cancer cells from low to high depending on the ligand that it binds. Jagged 1 (JAG1) is a NOTCH receptor ligand that is overexpressed in basal-like breast ca…	FALSE
GEO	200102045	G-Protein-Coupled Receptor 68 Negatively Regulates IL-22 Production in Human Th17 Cells	Homo sapiens	Purpose: To identify novel genes regulated by the aryl hydrocarbon receptor that influence human Th17 cell function. Methods: NaÃ¯ve CD4 T cells from peripheral blood of six healthy human volunteers were cultured under four experimental conditions for three days: anti-CD3 and anti-CD28 antibodies (Media control), Media with Th17 conditions (IL-6, TGF-b, IL-1b, IL-23), Th17+FICZ and Th17+CH223191.…	FALSE
GEO	200098515	Expression profiling of MCF-7 cells with treatment of TCDD	Homo sapiens	This SuperSeries is composed of the SubSeries listed below.	FALSE
GEO	200076608	Expression profiling of MCF-7 cells with 10nM treatment of TCDD	Homo sapiens	The aryl hydrocarbon receptor (AHR) is a ligand-activated transcription factor that is regulated by environmental toxicants that function as AHR agonists such as 2,3,7,8 tetrachlorodibenzo-p-dioxin (TCDD). L-Type Amino Acid Transporter 1 (LAT1) is a leucine uptake transporter that is overexpressed in cancer. The regulation of LAT1 by AHR in MCF-7 and MDA-MB-231 breast cancer cells (BCCs) was inve…	FALSE
GEO	200071220	The effect of statins on blood gene expression in COPD	Homo sapiens	Background: COPD is currently the fourth leading cause of death worldwide and predicted to rank third by 2020. Statins are commonly used lipid lowering agents with documented benefits on cardiovascular morbidity and mortality, and have also been shown to have pleiotropic effects including anti-inflammatory and anti-oxidant activity. Objective: Identify a gene signature associated with statin use …	FALSE
GEO	200059660	Expression profiling of WI38 normal lung fibroblasts following overexpression of p53 and/or Retinoblastoma	Homo sapiens	RNA expression profiling was performed on normal human lung fibroblast WI38 cells following overexpression of p53 and pRb, in order to identify genes co-regulated and involved in mediating p53 and pRb tumor suppressor processes.	FALSE
GEO	200063197	Human RORÎ³t+ CD34+ cells are lineage-specified progenitors of group 3 RORÎ³t+ innate lymphoid cells	Homo sapiens	Group 3 innate lymphoid cells (ILC3) are defined by the expression of RORÎ³t, which is selectively required for their development. The lineage-specified progenitor cells of human ILC3 and their developmental site after birth remain undefined. Here we identified a novel population of human CD34+ hematopoietic progenitor cells (HPC) expressing RORÎ³t and sharing with ILC3 a distinct transcriptional…	FALSE
GEO	200029678	Expression profiling of human peripheral blood before and after omega 3 dietary supplement.	Homo sapiens	Patients with early stage CLL were recruited into the study and administered a course of omega 3 dietary supplements. Expression profiling of each patient was performed at baseline (before administering the supplement) and after consumption of supplements. Patients were divided into two groups according to the level of NFkB activation at baseline, and then within each of the two groups significan…	FALSE
GEO	200036081	Effect of GRHL2 in HMLE+Twist-ER+4-OHT cells	Homo sapiens	Grainyhead genes are involved in wound healing and developmental neural tube closure. In light of the high degree of similarity between the epithelial-mesenchymal transitions (EMTs) occurring in wound healing processes and the cancer stem cell-like compartment of tumors, including TGF-Î²-dependence, we investigated the role of a Grainyhead gene (GRHL2) in oncogenic EMT. Grainyhead was specificall…	FALSE
GEO	200032673	E2F7 represses a transcriptional network of oscillating cell cycle genes to control S-phase progression.	Homo sapiens	E2F transcription factors are known to be important for timely activation of G1/S and G2/M genes required for cell cycle progression, but transcriptional mechanisms for deactivation of cell cycle regulated genes are unknown. Here, we show that E2F7 is highly expressed during mid to late S-phase, occupies promoters of G1/S regulated genes and represses its transcription. ChIP-seq analysis revealed…	FALSE
GEO	200017860	Expression profiles of human osteoblasts directly and indirectly damaged by chemotherapy	Homo sapiens	This SuperSeries is composed of the SubSeries listed below.	FALSE
GEO	200017843	Human osteoblast treated with recombinant TGF-beta	Homo sapiens	Global expression profile of human osteoblast treated with recombinant TGF-beta compared to human osteoblast treated with growth media alone	FALSE
GEO	200017842	Human osteoblast treated with chemotherapy-treated bone marrow stromal cell conditioned media	Homo sapiens	Global expression profile of human osteoblast treated with chemotherapy-treated bone marrow stromal cell conditioned media, compared to human osteoblast cells treated with diluent-control bone marrow stromal cell conditioned media. Goal is to identify genes regulated by chemotherapy in osteoblasts.	FALSE
GEO	200017839	Human osteoblast treated with Melphalen	Homo sapiens	Global expression profile of human osteoblast treated with melphalen, compared to human osteoblast cells treated with diluent control	FALSE
GEO	200023834	Recurrent disruption of HIP1 identified in patients with epilepsy, learning difficulties, intellectual disability, and neurobehavioral abnormalities	Homo sapiens	We report 12 individuals from ten unrelated families with epilepsy, learning difficulties, intellectual disability, and neurobehavioral abnormalities, who segregated a microdeletion distally adjacent to the Williams-Beuren syndrome region. In six families, a recurrent ~ 1.1 Mb deletion likely resulted from nonallelic homologous recombination between flanking large complex low-copy repeats. Three …	FALSE
GEO	200005184	PGC1alpha overexpression in human white adipose cells	Homo sapiens	Subcutaneous abdominal adipose tissue was obtained from female subjects undergoing plastic surgery in agreement with French laws on biomedical research. Stromal cells prepared from WAT were cultured for 13 days in a chemically defined medium. At day 13, 60â€“80% of cells were differentiated into lipid droplet-containing adipocytes. The cells were infected at a m.o.i. of 200 for 6 h. The day after…	FALSE
GEO	305111627	PLASMA-CH-VL-26-06-13	Homo sapiens	PLASMA	Maybe
GEO	305111626	PLASMA-CH-SI-26-06-13	Homo sapiens	PLASMA	Maybe
GEO	305111625	PLASMA-CH-SV-20-06-13	Homo sapiens	PLASMA	Maybe
GEO	305111624	PLASMA-CH-RB-20-06-13	Homo sapiens	PLASMA	Maybe
GEO	305111623	PLASMA-CH-QM-20-06-13	Homo sapiens	PLASMA	Maybe
GEO	305111622	PLASMA-CH-FP-27-06-13	Homo sapiens	PLASMA	Maybe
GEO	305111621	PLASMA-CH-FA-27-06-13	Homo sapiens	PLASMA	Maybe
GEO	305111620	PLASMA-CH-CA-27-06-13	Homo sapiens	PLASMA	Maybe
GEO	305111619	PLASMA-CH-AG-26-06-13	Homo sapiens	PLASMA	Maybe

## Sheet: MetabolomicsWorkbenchAPIFreeTex
Repo	Id	Name	Organism	Description	Validation
Metabolomics Workbench	ST001333	Huntington’s Disease Genotype Suppresses Global Manganese-Responsive Processes	Mus musculus	Global untargeted metabolomics studies performed in the striatum tissue, the brain region most sensitive to neurodegeneration in Huntington’s Disease, to investigate global Mn-dependent and Mn-responsive biology following various Mn exposures in a mouse model of HD.	FALSE

## Sheet: OmicsDIAPIFreeText
Repo	Id	Name	Organism	Description	Validation
OmicsDI	PXD023175	A blood atlas of COVID-19 defines hallmarks of disease severity and specificity	Homo Sapiens (human)	Treatment of severe COVID-19 is currently limited by clinical heterogeneity and incomplete description of specific immune biomarkers. We present here a comprehensive multi-omic blood atlas for patients with varying COVID-19 severity in an integrated comparison with influenza and sepsis patients versus healthy volunteers. We identify immune signatures and correlates of host response. Hallmarks of …	FALSE
OmicsDI	PXD001189	Quantitative Phosphorylation analysis in human platelets after ADP stimulation	Homo Sapiens (human)	Human platelets were treated with 20 ÂµM of ADP for 10, 30 and 60 s in triplicate. In a second experiment blood donations of three donors were split again in four fractions and one was treated with 20 ÂµM of ADP and the second and third with 20 ÂµM of ADP for 30 s and subsequently with 2 nM of Iloprost for further 30 s and 60 s.	FALSE
OmicsDI	PXD022554	Enforced dimerization between XBP1s and ATF6f enhances the protective effects of the unfolded protein response (UPR) in models of neurodegeneration	Homo Sapiens (human)	Alteration to endoplasmic reticulum (ER) proteostasis is observed on a variety of neurodegenerative diseases associated with abnormal protein aggregation. Activation of the unfolded protein response (UPR) enables an adaptive reaction to recover ER proteostasis and cell function. The UPR is initiated by specialized stress sensors that engage gene expression programs through the concerted action of…	FALSE
OmicsDI	PXD045072	Helicobacter pylori induces a novel form of innate immune memory via accumulation of NF-ÐºB proteins	Homo Sapiens (human)	Helicobacter pylori is a widespread Gram-negative pathogen involved in a variety of gastrointestinal diseases, including gastritis, ulceration, mucosa-associated lymphoid tissue (MALT) lymphoma and gastric cancer. Immune responses aimed at eradication of H. pylori often prove futile, and paradoxically play a crucial role in the degeneration of epithelial integrity and disease progression. We have…	FALSE
OmicsDI	PXD037004	Effect of hypoxia and treatment with cyclosporine A on chemotaxis of RAMOS B cells	Homo Sapiens (human)	Background: Hypoxia is a potent molecular signal for cellular metabolism, mitochondrial function, and migration. Conditions of low oxygen tension trigger regulatory cascades mediated via the highly conserved HIF-1 Î± post-translational modification system. In the adaptive immune response, B cells (Bc) are activated and differentiate under hypoxic conditions within lymph node germinal centers, and…	FALSE
OmicsDI	GSE71220	The effect of statins on blood gene expression in COPD	Homo sapiens	Background: COPD is currently the fourth leading cause of death worldwide and predicted to rank third by 2020. Statins are commonly used lipid lowering agents with documented benefits on cardiovascular morbidity and mortality, and have also been shown to have pleiotropic effects including anti-inflammatory and anti-oxidant activity. Objective: Identify a gene signature associated with statin use …	FALSE
OmicsDI	PXD020968	Proteomic adaptation of Streptococcus pneumoniae to the antimicrobial peptide human Beta Defensin 3 (hBD3) in comparison to other cell surface stresses	Streptococcus Pneumoniae Serotype 2 (strain D39 / Nctc 7466)	The antimicrobial peptide human Beta Defensin 3 (hBD3) is an essential part of the innate immune system and involved in protection against respiratory pathogens by specifically permeabilizing bacterial membranes. The Gram-positive bacterium S. pneumoniae causes serious diseases including pneumonia, meningitis, and septicemia despite being frequently exposed to human defense molecules including hB…	FALSE
OmicsDI	PXD022817	COVIDomics_plasma_2020_DDA-PASEF	Homo Sapiens (human)	In order to investigate variations in the endotype of COVID19 patients, we completed an integrated analysis of 112 research participants, including 74 COVID19 patients versus 37 SARS-CoV-2 negative controls. COVID19 patients tested positive for SARS-CoV-2 infection by PCR and/or antibody testing and were hospitalized due to COVID19 symptoms, but none of them had developed severe pathology requiri…	FALSE
OmicsDI	PXD005123	Somatic increase of CCT8 mimics proteostasis of human pluripotent stem cells and extends C. elegans lifespan	Homo Sapiens (human)	Human embryonic stem cells can replicate indefinitely while maintaining their undifferentiated state and, therefore, are immortal in culture. This capacity may demand avoidance of any imbalance in protein homeostasis (proteostasis) that would otherwise compromise stem cell identity. Here we show that human pluripotent stem cells exhibit enhanced assembly of the TRiC/CCT complex, a chaperonin that…	FALSE
OmicsDI	PXD035689	A rare human centenarian variant of SIRT6 enhances genome stability and interaction with Lamin A	Homo Sapiens (human)	Sirtuin 6 (SIRT6) is a deacylase and mono-ADP ribosyl transferase (mADPr) enzyme involved in multiple cellular pathways implicated in the regulation of aging and metabolism. Targeted sequencing identified a SIRT6 allele containing two linked substitutions (N308K/A313S) as enriched in Ashkenazi Jewish (AJ) centenarians as compared to AJ control individuals. Characterization of this SIRT6 (centSIRT…	FALSE
OmicsDI	PXD049972	Evaluation of the impact of the dietary inclusion of salty and sugary former food products on the liver and plasma profile of pigs through OMICS approaches	Sus Scrofa Domesticus (domestic Pig)	The research on alternative and sustainable feed ingredients is a challenge to reduce feed-food competition between humans and monogastrics, in particular pigs. Former food products (FFPs) drop out from the industrial production of food such as pasta, bread, snacks, and chips. They have a high nutritional and energetic value and represent an alternative and sustainable feed ingredient. The aim of…	FALSE
OmicsDI	PXD010865	Peptide mapping of purified huntingtin protein samples from different eukaryotic expression systems	Homo Sapiens (human)	Huntingtin expression, purification and biophysical characterisation: purified huntingtin protein samples of different polyQ lengths derived from insect cell and mammalian cell production were digested and subject to peptide mass spectrometry.	FALSE
OmicsDI	PXD022672	Metabolic reprogramming and host-immune response against Crimean-Congo Hemorrhagic Fever Viruses (CCHFV) during acute infection	Homo Sapiens (human)	The pathogenesis and host viral interactions of the Crimeanâ€“Congo hemorrhagic fever virus (CCHFV) are convoluted and have not been evaluated previously. To understand the host immune responses against CCHFV, we have performed a global transcriptomic analysis of peripheral blood mononuclear cells from a longitudinal cohort of CCHF patients who survived, and a temporal untargeted proteomics analy…	FALSE
OmicsDI	PXD017998	Changes in golden Syrian hamster HDL proteome caused by altered cholesteryl ester transfer protein expression	Mesocricetus Auratus (golden Hamster)	Cholesteryl ester transfer protein (CETP) transfers cholesteryl ester (CE) and triglyceride (TG) between lipoproteins, which alters lipoprotein metabolism. Hamster and human CETPs have very different preferences for CE versus TG as substrate. To assess the impact of altering CETPâ€™s substrate preference on lipoproteins in vivo, human CETP was expressed in hamsters (Mesocricetus auratus). Chow-fe…	FALSE
OmicsDI	GSE5184	PGC1alpha overexpression in human white adipose cells	Homo sapiens	Subcutaneous abdominal adipose tissue was obtained from female subjects undergoing plastic surgery in agreement with French laws on biomedical research. Stromal cells prepared from WAT were cultured for 13 days in a chemically defined medium. At day 13, 60â€“80% of cells were differentiated into lipid droplet-containing adipocytes. The cells were infected at a m.o.i. of 200 for 6 h. The day after…	FALSE
OmicsDI	PXD014572	Extracellular vesicles from therapeutic grade allogeneic human placental stromal cells induce angiogenesis and modulate immunity	Homo Sapiens (human)	Allogeneic regenerative cell therapy has shown surprising results despite lack of engraftment of the transplanted cells. Their efficacy was so far considered to be mostly due to secreted trophic factors. We hypothesized that extracellular vesicles (EVs) can also contribute to their mode of action. Here we provide evidence that EVs derived from therapeutic placental-expanded (PLX) stromal cells ar…	FALSE
OmicsDI	PXD044025	Proteomic analysis of methylmalonic acidemia fibroblasts	Homo Sapiens (human)	Methylmalonic academia (MMA) is a rare inborn error of the metabolism due to defects of the methylmalonyl-CoA mutase (MUT) enzyme that result in methylmalonic acid accumulation in the blood and increased excretion in urine. Affected patients can manifest vomiting, dehydration, hypotonia, developmental delay and failure to thrive. The emergency treatment of the newborns with MMA mainly comprises r…	FALSE
OmicsDI	E-GEOD-24250	The transcriptional modulator H2AFY marks Huntington's disease activity in men and mice	Homo sapiens	To accelerate the development of disease-modifying therapeutics for Huntingtonâ€™s disease (HD), a dynamic biomarker of disease activity and treatment response is critically needed. Venous cellular whole blood from 8 patients with Huntington's disease (HD) and 6 control subjects were collected in PAXgene tubes (Wiagen, Valencia, CA). RNA was isolated from whole blood using the PAXgene blood RNA k…	TRUE
OmicsDI	S-EPMC9321930	Modelling the Human Bloodâ€“Brain Barrier in Huntington Disease	Homo sapiens		FALSE
OmicsDI	PXD020601	Serum proteomics in COVID-19 patients: Altered coagulation and complement status as a function of IL-6 level	Homo Sapiens (human)	Over 5 million people around the world have tested positive for the beta coronavirus SARS-CoV- 2 as of May 29, 2020, a third of which in the United States alone. These infections are associated with the development of a disease known as COVID-19, which is characterized by several symptoms, including persistent dry cough, shortness of breath, chills, muscle pain, headache, loss of taste or smell, …	FALSE
OmicsDI	PXD046086	The antimicrobial peptide Esc(1-21)-1c increases susceptibility of Pseudomonas aeruginosa to conventional antibiotics by decreasing the expression of the MexAB-OprM efflux pump	Pseudomonas Aeruginosa Pao1	The increase in bacterial strains resistant to conventional antibiotics is an alarming problem for human health and could lead to pandemics in the future. Among bacterial pathogens responsible for a large variety of severe infections there is Pseudomonas aeruginosa. Therefore, there is an urgent need for new molecules with antimicrobial activity or that can act as adjuvants of antibiotics already…	FALSE
OmicsDI	S-EPMC6175010	Detailed analysis of HTT repeat elements in human blood using targeted amplification-free long-read sequencing.	Pseudomonas Aeruginosa Pao1		FALSE
OmicsDI	PXD019552	Site-Specific Ubiquitination of Pathogenic Huntingtin Attenuates its Deleterious Effects- PART2	Homo Sapiens (human)	Huntingtonâ€™s disease (HD) is a progressive incurable neurodegenerative disorder characterized by motor and neuropsychiatric symptoms. It is caused by expansion of a CAG triplet in the N-terminal domain of exon 1 in the huntingtin (HTT) gene that codes for an expanded polyglutamine (polyQ) stretch in the protein product which becomes aggregation-prone. The mutant Htt (mHtt) aggregates are associ…	FALSE
OmicsDI	S-EPMC8011966	Increasing brain palmitoylation rescues behavior and neuropathology in Huntington disease mice.	Homo Sapiens (human)		FALSE
OmicsDI	S-EPMC8516942	Age-related mitochondrial alterations in brain and skeletal muscle of the YAC128 model of Huntington disease.	Homo Sapiens (human)		FALSE
OmicsDI	S-EPMC3193232	Transcriptional modulator H2A histone family, member Y (H2AFY) marks Huntington disease activity in man and mouse.	Homo Sapiens (human)		TRUE
OmicsDI	PXD034863	Outer membrane utilisomes mediate oligosaccharide uptake in gut Bacteroidetes	Bacteroides Thetaiotaomicron	Bacteroidetes are abundant members of the human microbiota, and species occupying the distal gut are capable of utilising a myriad of diet- and host-derived glycans. Transport of glycans across the outer membrane (OM) of these bacteria is mediated by SusCD protein complexes. Additionally, cell surface-exposed lipoproteins, namely surface glycan binding proteins and glycoside hydrolases, play crit…	FALSE
OmicsDI	PXD051059	Targeting ATP2B1 impairs PI3K/Akt/Forkhead box (Fox) transcription factor signaling and reduces SARS-COV-2 infection and replication.	Homo Sapiens (human)	De Antonellis et al. shows the importance of the Ca2+ channel pump ATP2B1 in the regulation of intracellular Ca2+ levels that positively influence SARS-CoV-2 replication in human cells. Our study identifies the mechanism of action of SARS-CoV-2 in the regulation of the expression of ATP2B1 and ATP2A1 loci during infection via FOXO3 transcriptional factor. Furthermore, a small caloxin-derivative m…	FALSE
OmicsDI	S-EPMC11613659	Ascertainment of uninterrupted CAG repeat length and disease-modifying variants in fragment-based genetic testing for Huntington Disease.	Homo Sapiens (human)		FALSE
OmicsDI	MSV000094509	Multi-epitope immunocapture of huntingtin reveals striatum-selective molecular signatures in Huntington's disease mouse models	Homo Sapiens (ncbitaxon:9606)	Huntington's disease (HD) is a debilitating progressive neurodegenerative disorder that has profound effects on an individual's cognitive, motor, and behavioral functions. HD is caused by mutation in the huntingtin (HTT) gene that results in CAG repeat expansion and production of an aggregation-prone polyglutamine-containing protein (mHTT). The expression of mHTT causes selective degeneration, ma…	Maybe
OmicsDI	PXD019553	Site-Specific Ubiquitination of Pathogenic Huntingtin Attenuates its Deleterious Effects	Rattus Rattus (black Rat)	Huntingtonâ€™s disease (HD) is a progressive incurable neurodegenerative disorder characterized by motor and neuropsychiatric symptoms. It is caused by expansion of a CAG triplet in the N-terminal domain of exon 1 in the huntingtin (HTT) gene that codes for an expanded polyglutamine (polyQ) stretch in the protein product which becomes aggregation-prone. The mutant Htt (mHtt) aggregates are associ…	FALSE
OmicsDI	PXD039984	Mining the human gut microbiome identifies mycobacterial D-arabinan degrading enzymes	Dysgonomonas Gadei	Division and degradation of bacterial cell walls requires coordinated action of a myriad of enzymes. This particularly applies to the elaborate cell walls of acid-fast organisms such as Mycobacterium tuberculosis, which consist of a multi-layered cell wall that contains an unusual glycan called arabinogalactan. Enzymes that cleave the D-arabinan core of this structure have not previously been ide…	FALSE
OmicsDI	S-EPMC8049011	Statistical method for modeling sequencing data from different technologies in longitudinal studies with application to Huntington disease.	Dysgonomonas Gadei		FALSE
OmicsDI	MSV000087310	Enterically derived high density lipoprotein restrains liver injury via the portal vein	Mus Musculus (ncbitaxon:10090)	The proteomes of HDL subspecies, HDL2 and HDL3, from pooled human serum purified by density gradient centrifugation were generated and compared to the proteomes of HDL2 and HDL3 derived from tportal venouhe s and antecubital venous blood matched across these two locations from the same individual. The latter were purified by size exclusion chromatography coupled with immunoprecipitation with anti…	FALSE
OmicsDI	S-EPMC9352962	A probable <i>cis</i>-acting genetic modifier of Huntington disease frequent in individuals with African ancestry.	Mus Musculus (ncbitaxon:10090)		FALSE
OmicsDI	PXD061598	PP1/PNUTS phosphatase binds the restrictor complex and stimulates RNA pol II transcription termination	Homo Sapiens (human)	The restrictor, ZC3H4/WDR82, terminates antisense transcription from bidirectional promoters, but its mechanism is poorly understood. We report that ZC3H4/WDR82 immunoprecipitate with PP1 phosphatase and its nuclear targeting subunit, PNUTS, which binds to WDR82. AlphaFold predicts a complex of PP1/PNUTS with restrictor where both PNUTS and ZC3H4 contact WDR82. A substrate trap, PP1H66K-PNUTS, co…	FALSE
OmicsDI	S-EPMC5733638	Molecular interactions governing host-specificity of blood stage malaria parasites.	Homo Sapiens (human)		FALSE
OmicsDI	PXD020617	Addressing reproducibility challenges in cell culture: the impact of oxylipins contained in fetal calf serum	Homo Sapiens (human)	Reproducibility issues regarding complex in vitro cell culture experiments have been mainly attributed to genetic variations within cell lines. Batch-dependent fetal calf serum variations are well known and also represent relevant influencing factors. However, the molecular constituents mediating such effects remained largely unknown. High resolution mass spectrometry is a powerful tool to identi…	FALSE
OmicsDI	S-EPMC4341019	Selection and characterization of llama single domain antibodies against N-terminal huntingtin.	Homo Sapiens (human)		FALSE
OmicsDI	PXD020669	Improved sensitivity of ultra-low flow LC-MS-based proteomic profiling of limited samples using monolithic capillary columns and FAIMS technology	Homo Sapiens (human)	In this work, we pioneered a combination of ultra-low flow (ULF) high-efficiency ultra-narrow bore monolithic LC columns coupled to MS via a high-field asymmetric waveform ion mobility spectrometry (FAIMS) interface to evaluate the potential applicability for high sensitivity, robust and reproducible proteomic profiling of low ng-level complex biological samples.	FALSE
OmicsDI	PXD035339	On-capillary cell lysis enables top-down proteomic analysis of single HeLa cells by CE-MS/MS	Homo Sapiens (human)	Proteomic analysis of limited samples and single cells requires specialized methods that prioritize high sensitivity and minimize sample loss. Consequently, sample preparation is one of the most important steps in limited sample analysis workflows to prevent sample loss. In this work, we have eliminated sample handling and transfer steps by processing intact cells directly in the separation capil…	FALSE
OmicsDI	PXD038477	FAIMS-DIA Proteomics of LIRIL2R-Deficient Induced Regulatory T Cells	Homo Sapiens (human)	Long non-coding RNA, LIRIL2R was identified and confirmed to be differentially expressed in regulatory T cells by RNAseq. A role of LIRIL2R was studied in iTreg cells using multiple approaches. Data independent analysis proteomics revealed effects of LIRIL2R knock down in Treg cells. Loss of Treg signature proteins upon LIRIL2R knock down signified the its role in iTreg cell development and funct…	FALSE
OmicsDI	S-EPMC4350773	Blood-brain barrier breakdown in the aging human hippocampus.	Homo Sapiens (human)		FALSE
OmicsDI	E-GEOD-71220	The effect of statins on blood gene expression in COPD	Homo sapiens	Background: COPD is currently the fourth leading cause of death worldwide and predicted to rank third by 2020. Statins are commonly used lipid lowering agents with documented benefits on cardiovascular morbidity and mortality, and have also been shown to have pleiotropic effects including anti-inflammatory and anti-oxidant activity. Objective: Identify a gene signature associated with statin use …	FALSE
OmicsDI	PRJEB49487	Blood brain barrier dysfunction in a 2D in vitro Blood brain barrier model of Huntington Disease.	Homo sapiens	Transcriptome sequencing of human induced pluripotent stem cell-derived brain endothelial cells. Overall design: Examined one time point (Day 10 of differentiation) in triplicate from three different iPSC_BMECs. Sample name: iBMEC_33Q, iBMEC_71Q and iBMEC_109Q iBMEC: (iPSC)-derived brain-like microvascular endothelial cells Total samples: 9	FALSE
OmicsDI	PXD044960	Investigation of DNA double-strand break repair mechanisms in microsatellite regions using the CRISPR/Cas9 system	Homo Sapiens (human)	Expansion of the CAG/CTG repeats in functionally unrelated genes is a causative factor in many inherited neurodegenerative disorders, including Huntington's disease (HD), spinocerebellar ataxias (SCAs) and myotonic dystrophy type 1 (DM1). Despite many years of research, the mechanism responsible for repeat instability is unknown, and recent findings indicate the key role of DNA repair in this pro…	FALSE
OmicsDI	S-EPMC6367058	Blood-brain barrier breakdown is an early biomarker of human cognitive dysfunction.	Homo Sapiens (human)		FALSE
OmicsDI	S-EPMC11416711	Developing a transwell millifluidic device for studying blood-brain barrier endothelium.	Homo Sapiens (human)		FALSE
OmicsDI	S-EPMC9200056	Parallel imaging of coagulation pathway proteases activated protein C, thrombin, and factor Xa in human plasma.	Homo Sapiens (human)		FALSE
OmicsDI	PXD019430	VAV3 in ERBB4-mediated cancer cell migration	Homo Sapiens (human)	ERBB4 is a member of the epidermal growth factor receptor (EGFR)/ERBB subfamily of receptor tyrosine kinases that regulates cellular processes including proliferation, migration and survival. ERBB4 signaling is involved in embryogenesis and homeostasis of adult tissues, but also in human pathologies such as cancer, neurological disorders and cardiovascular diseases. A mass spectrometry screen rev…	FALSE
OmicsDI	S-EPMC9101250	Mapping the prothrombin-binding site of pseutarin C by site-directed PEGylation.	Homo Sapiens (human)		FALSE
OmicsDI	S-EPMC1474138	Comprehensive association testing of common mitochondrial DNA variation in metabolic disease.	Homo Sapiens (human)		FALSE
OmicsDI	S-EPMC3798993	Crystal structure of the prothrombinase complex from the venom of Pseudonaja textilis.	Homo Sapiens (human)		FALSE
OmicsDI	S-EPMC9743774	The mutational dynamics of short tandem repeats in large, multigenerational families.	Homo Sapiens (human)		FALSE
OmicsDI	S-EPMC10066375	Aging reduces calreticulin expression and alters spontaneous calcium signals in astrocytic endfeet of the mouse dorsolateral striatum.	Homo Sapiens (human)		FALSE
OmicsDI	S-EPMC10041521	Fluorescent Activity-Based Probe To Image and Inhibit Factor XIa Activity in Human Plasma.	Homo Sapiens (human)		FALSE
OmicsDI	S-EPMC5829048	Blood-brain barrier breakdown in Alzheimer disease and other neurodegenerative disorders.	Homo Sapiens (human)		FALSE
OmicsDI	S-EPMC5561550	Peripubertal blood lead levels and growth among Russian boys.	Homo Sapiens (human)		FALSE
OmicsDI	PXD013710	Proteomic analysis of urinary microvesicles reveal biomarkers for neurologic disease	Homo Sapiens (human)	Background- Extracellular vesicles (EVs) harbor thousands of proteins that hold promise for biomarker development. Usually difficult to purify, EVs in urine are relatively easily obtained and have demonstrated efficacy for kidney disease prediction. Herein, we further characterize the proteome of urinary EVs to explore the potential for biomarkers unrelated to kidney dysfunction, focusing on Park…	FALSE
OmicsDI	PXD005953	Extended multiplexing of TMT labeling reveals age and high fat diet specific proteome changes in mouse epididymal adipose tissue	Mus Musculus (mouse)	Age-related and/or high caloric intake driven changes in visceral adipose tissue contribute to the development of diabetes and cardiovascular disease. The lack of reliable, high-throughput methods to analyze the adipose tissue protein composition has limited our understanding of the protein networks responsible for metabolic regulation of various adipose depots. We have developed a proteomic appr…	FALSE
OmicsDI	S-EPMC8981650	PA1 participates in the maintenance of blood-testis barrier integrity via cooperation with JUN in the Sertoli cells of mice.	Mus Musculus (mouse)		FALSE
OmicsDI	S-EPMC5526324	Maternal blood contamination of collected cord blood can be identified using DNA methylation at three CpGs.	Mus Musculus (mouse)		FALSE
OmicsDI	S-EPMC1636828	DNA repair protein involved in heart and blood development.	Mus Musculus (mouse)		FALSE
OmicsDI	MSV000084689	Cross-linking modifications of HDL apoproteins by oxidized phospholipids: Structural characterization, in vivo detection, and functional implications	Homo Sapiens (human)	Apolipoprotein A-I (apoA-I) is cross-linked and dysfunctional in human atheroma. Although multiple mechanisms of apoA-1 cross-linking have been demonstrated in vitro, the in vivo mechanisms of cross-linking are not well established. We have recently demonstrated the highly selective and efficient modification of high-density lipoprotein (HDL) apoproteins by endogenous oxidized phospholipids (oxPL…	FALSE
OmicsDI	S-EPMC5850735	Serum omega-3 fatty acids and treatment outcomes among women undergoing assisted reproduction.	Homo Sapiens (human)		FALSE
OmicsDI	S-EPMC4175394	Plasmodium falciparum transmission stages accumulate in the human bone marrow.	Homo Sapiens (human)		FALSE
OmicsDI	PXD051407	Targeted MS validation of huntingtin protein interaction signatures in Huntington's disease mouse models	Mus Musculus	Huntingtonâ€™s disease (HD) is a debilitating progressive neurodegenerative disorder that has profound effects on an individualâ€™s cognitive, motor, and behavioral functions. HD is caused by mutation in the huntingtin (HTT) gene that results in CAG repeat expansion and production of an aggregation-prone polyglutamine-containing protein (mHTT). The expression of mHTT causes selective degeneration…	FALSE
OmicsDI	S-EPMC4007519	Human exposure to nitro musks and the evaluation of their potential toxicity: an overview.	Mus Musculus		FALSE
OmicsDI	S-EPMC7946873	Data-driven curation process for describing the blood glucose management in the intensive care unit.	Mus Musculus		FALSE
OmicsDI	PXD018169	Extracellular Vesicles proteind in vascular calcification	Mus Musculus (mouse)	Vascular Calcification (VC) is a life threatening cardiovascular complication that accounts for high death rates particularly in association with diabetes, atherosclerosis and Chronic Kidney Disease (CKD. during VC, Vascular Smooth Muscle Cells (VSMCs) undergo reprogramming into osteoblast-like cells in response to calcium and phosphate mineral imbalance in CKD patients. This osteogenic switch is…	FALSE
OmicsDI	S-EPMC5822408	Rapid loss of group 1 innate lymphoid cells during blood stage <i>Plasmodium</i> infection.	Mus Musculus (mouse)		FALSE
OmicsDI	S-EPMC5576211	Blood lead levels and neurodevelopmental function in perinatally HIV-exposed, uninfected children in a US-based longitudinal cohort study.	Mus Musculus (mouse)		FALSE
OmicsDI	S-EPMC18676	Identification of phylogenetic footprints in primate tumor necrosis factor-alpha promoters.	Mus Musculus (mouse)		FALSE
OmicsDI	S-EPMC7138855	The Na/K-ATPase Î±1 and c-Src form signaling complex under native condition: A crosslinking approach.	Mus Musculus (mouse)		FALSE
OmicsDI	PXD016336	BirA*-RAB18 proximity biotinylation in HeLa cells	Homo Sapiens (human)	Proximity labelling using transient expression of the same exogenous BirA*-RAB18 construct in wild-type HeLa cells and in otherwise isogenic RAB3GAP1-, RAB3GAP2- and TRAPPC9-null HeLa cell lines.	FALSE
OmicsDI	S-EPMC2846941	RBC and WBC fatty acid composition following consumption of an omega 3 supplement: lessons for future clinical trials.	Homo Sapiens (human)		FALSE
OmicsDI	S-EPMC3953952	Anti-citrullinated peptide autoantibodies, human leukocyte antigen shared epitope and risk of future rheumatoid arthritis: a nested case-control study.	Homo Sapiens (human)		FALSE
OmicsDI	S-EPMC10509525	Study protocol of IMAGINE-HD: Imaging iron accumulation and neuroinflammation with 7T-MRIÂ +Â CSF in Huntington's disease.	Homo Sapiens (human)		TRUE
OmicsDI	S-EPMC6098021	Na/K-ATPase Y260 Phosphorylation-mediated Src Regulation in Control of Aerobic Glycolysis and Tumor Growth.	Homo Sapiens (human)		FALSE
OmicsDI	S-EPMC7969998	Does Prenatal Exposure to CNS Stimulants Increase the Risk of Cardiovascular Disease in Adult Offspring?	Homo Sapiens (human)		FALSE
OmicsDI	MSV000079100	A Rac/Cdc42 exchange factor complex promotes formation of lateral filopodia...	Homo Sapiens (ncbitaxon:9606)	3xFLAG-IPs from HEK293T cell lysates expressing 3xFLAG-bait or 3xFLAG-control. Trypsin Digestion	FALSE
OmicsDI	S-EPMC1182430	Recombinant AAV2 transduction of primitive human hematopoietic stem cells capable of serial engraftment in immune-deficient mice.	Homo Sapiens (ncbitaxon:9606)		FALSE
OmicsDI	S-EPMC7418728	Natural Killer cell activation, reduced ACE2, TMPRSS2, cytokines G-CSF, M-CSF and SARS-CoV-2-S pseudovirus infectivity by MEK inhibitor treatment of human cells.	Homo Sapiens (ncbitaxon:9606)		FALSE
OmicsDI	S-EPMC136554	Magnitude and frequency of cytotoxic T-lymphocyte responses: identification of immunodominant regions of human immunodeficiency virus type 1 subtype C.	Homo Sapiens (ncbitaxon:9606)		FALSE
OmicsDI	S-EPMC5532064	Cardiotonic Steroids Stimulate Macrophage Inflammatory Responses Through a Pathway Involving CD36, TLR4, and Na/K-ATPase.	Homo Sapiens (ncbitaxon:9606)		FALSE
OmicsDI	PRJNA612723	DNA methylation profiles from a mouse model of Huntington's disease	Homo Sapiens (ncbitaxon:9606)	DNA methylation profiles from a mouse model of Huntington's disease	FALSE
OmicsDI	S-EPMC6506781	Loss-of-Function in SMAD4 Might Not Be Critical for Human Natural Killer Cell Responsiveness to TGF-Î².	Homo Sapiens (ncbitaxon:9606)		FALSE
OmicsDI	S-EPMC6454504	Age-Related Expression of Human AT1R Variants and Associated Renal Dysfunction in Transgenic Mice.	Homo Sapiens (ncbitaxon:9606)		FALSE
OmicsDI	S-EPMC6284456	Dissociation between urate and blood pressure in mice and in people with early Parkinson's disease.	Homo Sapiens (ncbitaxon:9606)		FALSE
OmicsDI	S-EPMC3352992	Tag-free microfluidic separation of cells against multiple markers.	Homo Sapiens (ncbitaxon:9606)		FALSE
OmicsDI	S-EPMC8412142	Lead Optimization of 3,5-Disubstituted-7-Azaindoles for the Treatment of Human African Trypanosomiasis.	Homo Sapiens (ncbitaxon:9606)		FALSE
OmicsDI	phs000007.v17.p6	Framingham Cohort	Homo Sapiens (ncbitaxon:9606)	<p><b>Startup of Framingham Heart Study.</b> Cardiovascular disease (CVD) is the leading cause of death and serious illness in the United States. In 1948, the Framingham Heart Study (FHS) -- under the direction of the National Heart Institute (now known as the National Heart, Lung, and Blood Institute, NHLBI) -- embarked on a novel and ambitious project in health research. At the time, little was…	FALSE
OmicsDI	S-EPMC7250000	APOE4 leads to blood-brain barrier dysfunction predicting cognitive decline.	Homo Sapiens (ncbitaxon:9606)		FALSE
OmicsDI	PRJNA612722	DNA methylation profiles from a transgenic sheep model of Huntington's disease	Homo Sapiens (ncbitaxon:9606)	DNA methylation profiles from a transgenic sheep model of Huntington's disease	FALSE
OmicsDI	S-EPMC3971351	Pathprinting: An integrative approach to understand the functional basis of disease.	Homo Sapiens (ncbitaxon:9606)		FALSE
OmicsDI	S-EPMC3205478	Heart health when life is satisfying: evidence from the Whitehall II cohort study.	Homo Sapiens (ncbitaxon:9606)		FALSE
OmicsDI	S-EPMC1563694	Genomic sites of human immunodeficiency virus type 2 (HIV-2) integration: similarities to HIV-1 in vitro and possible differences in vivo.	Homo Sapiens (ncbitaxon:9606)		FALSE
OmicsDI	S-EPMC3850820	Protein analysis in human cerebrospinal fluid: Physiological aspects, current progress and future challenges.	Homo Sapiens (ncbitaxon:9606)		FALSE
OmicsDI	S-EPMC8934682	The role of junctophilin proteins in cellular function.	Homo Sapiens (ncbitaxon:9606)		FALSE
OmicsDI	S-EPMC10174328	Contribution of adipocyte Na/K-ATPase Î±1/CD36 signaling induced exosome secretion in response to oxidized LDL.	Homo Sapiens (ncbitaxon:9606)		FALSE
OmicsDI	S-EPMC2949186	Glial dysfunction in abstinent methamphetamine abusers.	Homo Sapiens (ncbitaxon:9606)		FALSE
OmicsDI	S-EPMC2656934	The genome of the simian and human malaria parasite Plasmodium knowlesi.	Homo Sapiens (ncbitaxon:9606)		FALSE
OmicsDI	S-EPMC10896768	Effects of Electronic Cigarette Vaping on Cardiac and Vascular Function, and Post-myocardial Infarction Remodeling in Rats.	Homo Sapiens (ncbitaxon:9606)		FALSE
OmicsDI	PRJNA130645	Homo sapiens	Homo Sapiens (ncbitaxon:9606)	Recurrent disruption of HIP1 identified in patients with epilepsy, learning difficulties, intellectual disability, and neurobehavioral abnormalities	FALSE
OmicsDI	S-EPMC8671114	Race, geographical location and other risk factors for hypertension: South African National Health and Nutrition Examination Survey 2011/12.	Homo Sapiens (ncbitaxon:9606)		FALSE
OmicsDI	S-EPMC11220145	Somatic CAG repeat instability in intermediate alleles of the HTT gene and its potential association with a clinical phenotype.	Homo Sapiens (ncbitaxon:9606)		FALSE
OmicsDI	S-EPMC8785538	Spatiotemporal distribution, abundance, and host interactions of two invasive vectors of arboviruses, Aedes albopictus and Aedes japonicus, in Pennsylvania, USA.	Homo Sapiens (ncbitaxon:9606)		FALSE
OmicsDI	S-EPMC7167334	Cord blood DNA methylation of DNMT3A mediates the association between in utero arsenic exposure and birth outcomes: Results from a prospective birth cohort in Bangladesh.	Homo Sapiens (ncbitaxon:9606)		FALSE
OmicsDI	PXD039177	Tupaia chinensis hippocampus LC-MS/MS	Tupaia Chinensis	Tree age groups of T.chinensisâ€“15 days, 3 months and 1.5 years â€“ were selected to study their hippocampal protein expression profiles.	FALSE
OmicsDI	S-EPMC3656385	Development of a Chip/Chip/SRM platform using digital chip isoelectric focusing and LC-Chip mass spectrometry for enrichment and quantitation of low abundance protein biomarkers in human plasma.	Tupaia Chinensis		FALSE
OmicsDI	PRJNA290626	Homo sapiens	Tupaia Chinensis	The effect of statins on blood gene expression in COPD	FALSE
OmicsDI	S-EPMC2987415	Dietary anaplerotic therapy improves peripheral tissue energy metabolism in patients with Huntington's disease.	Tupaia Chinensis		FALSE
OmicsDI	S-EPMC10036494	Highly-sensitive label-free deep profiling of N-glycans released from biomedically-relevant samples.	Tupaia Chinensis		FALSE
OmicsDI	S-EPMC6314084	Actinobaculum massiliense Proteome Profiled in Polymicrobial Urethral Catheter Biofilms.	Tupaia Chinensis		FALSE
OmicsDI	S-EPMC3979039	Altered expression of protein tyrosine phosphatase, non-receptor type 22 isoforms in systemic lupus erythematosus.	Tupaia Chinensis		FALSE
OmicsDI	S-EPMC3687518	Malaria-infected erythrocyte-derived microvesicles mediate cellular communication within the parasite population and with the host immune system.	Tupaia Chinensis		FALSE
OmicsDI	S-EPMC10369801	Three dimensional evaluation of cerebrovascular density and branching in chronic traumatic encephalopathy.	Tupaia Chinensis		FALSE
OmicsDI	S-EPMC11775147	Cognitive reserve is associated with education, social determinants, and cognitive outcomes among older American Indians in the Strong Heart Study.	Tupaia Chinensis		FALSE
OmicsDI	S-EPMC2932764	MicroRNAs as effectors of brain function with roles in ischemia and injury, neuroprotection, and neurodegeneration.	Tupaia Chinensis		FALSE
OmicsDI	S-EPMC8791584	Vesicular trafficking is a key determinant of the statin response in acute myeloid leukemia.	Tupaia Chinensis		FALSE
OmicsDI	S-EPMC11385583	Genome-wide association study meta-analysis of neurofilament light (NfL) levels in blood reveals novel loci related to neurodegeneration.	Tupaia Chinensis		FALSE
OmicsDI	S-EPMC5711624	Near infrared spectroscopy for measuring changes in bone hemoglobin content after exercise in individuals with spinal cord injury.	Tupaia Chinensis		FALSE
OmicsDI	S-EPMC3951744	Lead exposure and rate of change in cognitive function in older women.	Tupaia Chinensis		FALSE
OmicsDI	S-EPMC8726715	Modulating FKBP5/FKBP51 and autophagy lowers HTT (huntingtin) levels.	Tupaia Chinensis		FALSE
OmicsDI	S-EPMC5310119	SMAD transcription factors are altered in cell models of HD and regulate HTT expression.	Tupaia Chinensis		FALSE
OmicsDI	S-EPMC8238482	BCL-XL antagonism selectively reduces neutrophil life span within inflamed tissues without causing neutropenia.	Tupaia Chinensis		FALSE
OmicsDI	S-EPMC9179936	Platelet-mimicking procoagulant nanoparticles augment hemostasis in animal models of bleeding.	Tupaia Chinensis		FALSE
OmicsDI	MSV000084607	A Multi-Omics Interpretable Machine Learning Model Reveals Modes of Action of Small Molecules	Mus Musculus (ncbitaxon:10090)	Cells expressing mutant huntingtin were treated in triplicate with serum-free DMEM with vehicle (Q111SST) or serum-free DMEM with one of 4 protective compounds (Cyproheptadine, Loxapine, Diacylglycerol Kinase Inhibitor II, Meclizine) for 24 hours. Wild type cells were also treated with serum-free DMEM with vehicle (Q7SST) as an additional control for 24 hours. We examined the compounds' proteomic…	FALSE
OmicsDI	S-EPMC10141503	Umbilical cord DNA methylation is associated with body mass index trajectories from birth to adolescence.	Mus Musculus (ncbitaxon:10090)		FALSE
OmicsDI	S-EPMC2829370	Population genetic analysis of large sequence polymorphisms in Plasmodium falciparum blood-stage antigens.	Mus Musculus (ncbitaxon:10090)		FALSE
OmicsDI	S-EPMC4516141	Directional dominance on stature and cognition inÂ diverse human populations.	Mus Musculus (ncbitaxon:10090)		FALSE
OmicsDI	S-EPMC7679035	MEK inhibitors reduce cellular expression of ACE2, pERK, pRb while stimulating NK-mediated cytotoxicity and attenuating inflammatory cytokines relevant to SARS-CoV-2 infection.	Mus Musculus (ncbitaxon:10090)		FALSE
OmicsDI	S-EPMC9623595	Meta-analysis of epigenome-wide association studies in newborns and children show widespread sex differences in blood DNA methylation.	Mus Musculus (ncbitaxon:10090)		FALSE
OmicsDI	S-EPMC6650348	The Role of Pharmacy Refill Measures in Assessing Adherence and Predicting HIV Disease Markers in Youth with Perinatally-Acquired HIV (PHIV).	Mus Musculus (ncbitaxon:10090)		FALSE
OmicsDI	S-EPMC2168398	Plasmodium falciparum Sir2: an unusual sirtuin with dual histone deacetylase and ADP-ribosyltransferase activity.	Mus Musculus (ncbitaxon:10090)		FALSE
OmicsDI	S-EPMC5090125	Epigenetic DNA Methylation Profiling with MSRE: A Quantitative NGS Approach Using a Parkinson's Disease Test Case.	Mus Musculus (ncbitaxon:10090)		FALSE
OmicsDI	S-EPMC3640834	Early life predictors of atrial fibrillation-related mortality: evidence from the health and retirement study.	Mus Musculus (ncbitaxon:10090)		FALSE
OmicsDI	S-EPMC8623192	Effects of Different Allotments of Avocados on the Nutritional Status of Families: A Cluster Randomized Controlled Trial.	Mus Musculus (ncbitaxon:10090)		FALSE
OmicsDI	S-EPMC3700827	A panel study of occupational exposure to fine particulate matter and changes in DNA methylation over a single workday and years worked in boilermaker welders.	Mus Musculus (ncbitaxon:10090)		FALSE
OmicsDI	S-EPMC5121507	Rapamycin Attenuates Cardiac Fibrosis in Experimental Uremic Cardiomyopathy by Reducing Marinobufagenin Levels and Inhibiting Downstream Pro-Fibrotic Signaling.	Mus Musculus (ncbitaxon:10090)		FALSE
OmicsDI	S-EPMC6927478	Undetectable gadolinium brain retention in individuals with an age-dependent blood-brain barrier breakdown in the hippocampus and mild cognitive impairment.	Mus Musculus (ncbitaxon:10090)		FALSE
OmicsDI	S-EPMC9793579	Implicating genes, pleiotropy, and sexual dimorphism at blood lipid loci through multi-ancestry meta-analysis.	Mus Musculus (ncbitaxon:10090)		FALSE
OmicsDI	S-EPMC7408149	Changes in Metabolites During an Oral Glucose Tolerance Test in Early and Mid-Pregnancy: Findings from the PEARLS Randomized, Controlled Lifestyle Trial.	Mus Musculus (ncbitaxon:10090)		FALSE
OmicsDI	S-EPMC3276110	Diversity-Oriented Synthesis Yields a Novel Lead for the Treatment of Malaria.	Mus Musculus (ncbitaxon:10090)		FALSE
OmicsDI	S-EPMC3155522	Brain-derived neurotrophic factor in patients with Huntington's disease.	Mus Musculus (ncbitaxon:10090)		FALSE
OmicsDI	S-EPMC5553685	Agonists of epoxyeicosatrienoic acids reduce infarct size and ameliorate cardiac dysfunction via activation of HO-1 and Wnt1 canonical pathway.	Mus Musculus (ncbitaxon:10090)		FALSE
OmicsDI	S-EPMC2636996	Febrile temperature leads to significant stiffening of Plasmodium falciparum parasitized erythrocytes.	Mus Musculus (ncbitaxon:10090)		FALSE
OmicsDI	S-EPMC7961126	Pulmonary fate and consequences of transferrin-functionalized gold nanoparticles.	Mus Musculus (ncbitaxon:10090)		FALSE
OmicsDI	S-EPMC6173610	High school cigarette smoking and post-secondary education enrollment: Longitudinal findings from the NEXT Generation Health Study.	Mus Musculus (ncbitaxon:10090)		FALSE
OmicsDI	S-EPMC11697022	Functional large-conductance calcium and voltage-gated potassium channels in extracellular vesicles act as gatekeepers of structural and functional integrity.	Mus Musculus (ncbitaxon:10090)		FALSE
OmicsDI	S-EPMC9434700	Design, Synthesis, and Characterization of [<sup>18</sup>F]mG2P026 as a High-Contrast PET Imaging Ligand for Metabotropic Glutamate Receptor 2.	Mus Musculus (ncbitaxon:10090)		FALSE
OmicsDI	S-EPMC5025259	Glycogen Synthase Kinase 3Î² Promotes the Endocytosis of Transferrin in the African Trypanosome.	Mus Musculus (ncbitaxon:10090)		FALSE
OmicsDI	PXD000990	Cocaine and Environmental Enrichment Proteomics Study of Rat Nucleus Accumbens	Rattus Norvegicus (rat)	Prior research demonstrated that environmental enrichment creates individual differences in behavior leading to a protective addiction phenotype in rats. Understanding the mechanisms underlying this phenotype will guide selection of targets for much-needed novel pharmacotherapeutics. The current study investigates basal differences in proteome expression in the nucleus accumbens of enriched and i…	FALSE
OmicsDI	S-EPMC6345504	CD36 Enhances Vascular Smooth Muscle Cell Proliferation and Development of Neointimal Hyperplasia.	Rattus Norvegicus (rat)		FALSE
OmicsDI	S-EPMC6451770	Does pregnancy complication history improve cardiovascular disease risk prediction? Findings from the HUNT study in Norway.	Rattus Norvegicus (rat)		FALSE
OmicsDI	PXD011253	ECT2 associated to PRICKLE1 are poor-prognosis markers in triple-negative breast cancer	Homo Sapiens (human)	Triple negative breast cancer (TNBC) is the most aggressive breast cancer subtype and the lack of specific signature makes difficult the development of targeted therapeutic strategy. We previously found that PRICKLE1, an evolutionary conserved protein acting as a regulator of vertebrate development, is upregulated in TNBC. Proteomic approaches allowed us to decipher the protein complex associated…	FALSE
OmicsDI	S-EPMC6913883	Longitudinal associations of neighborhood socioeconomic status with cardiovascular risk factors: A 46-year follow-up study.	Homo Sapiens (human)		FALSE
OmicsDI	S-EPMC4230994	CYP2J2 targeting to endothelial cells attenuates adiposity and vascular dysfunction in mice fed a high-fat diet by reprogramming adipocyte phenotype.	Homo Sapiens (human)		FALSE
OmicsDI	S-EPMC3218844	A global transcriptional analysis of Plasmodium falciparum malaria reveals a novel family of telomere-associated lncRNAs.	Homo Sapiens (human)		FALSE
OmicsDI	S-EPMC5789891	Gimap5-dependent inactivation of GSK3Î² is required for CD4<sup>+</sup> T cell homeostasis and prevention of immune pathology.	Homo Sapiens (human)		FALSE
OmicsDI	S-EPMC9236625	Perceived effectiveness of added-sugar warning label designs for U.S. restaurant menus: An online randomized controlled trial.	Homo Sapiens (human)		FALSE
OmicsDI	S-EPMC10333277	Genome-wide association analysis and Mendelian randomization proteomics identify drug targets for heart failure.	Homo Sapiens (human)		FALSE
OmicsDI	PRJNA96487	Homo sapiens	Homo Sapiens (human)	PGC1alpha overexpression in human white adipose cells	FALSE
OmicsDI	MSV000082569	Extended multiplexing of TMT labeling reveals age and high fat diet specific proteome changes in mouse epididymal adipose tissue	Mus Musculus (ncbitaxon:10090)	Age-related and/or high caloric intake driven changes in visceral adipose tissue contribute to the development of diabetes and cardiovascular disease. The lack of reliable, high-throughput methods to analyze the adipose tissue protein composition has limited our understanding of the protein networks responsible for metabolic regulation of various adipose depots. We have developed a proteomic appr…	FALSE
OmicsDI	S-EPMC7798340	Circular RNAs in body fluids as cancer biomarkers: the new frontier of liquid biopsies.	Mus Musculus (ncbitaxon:10090)		FALSE
OmicsDI	S-EPMC3484648	Discovery and fine mapping of serum protein loci through transethnic meta-analysis.	Mus Musculus (ncbitaxon:10090)		FALSE
OmicsDI	S-EPMC4309995	In utero arsenic exposure and fetal immune repertoire in a US pregnancy cohort.	Mus Musculus (ncbitaxon:10090)		FALSE
OmicsDI	S-EPMC3101419	Aminoindoles, a novel scaffold with potent activity against Plasmodium falciparum.	Mus Musculus (ncbitaxon:10090)		FALSE
OmicsDI	S-EPMC9388392	A multi-layer functional genomic analysis to understand noncoding genetic variation in lipids.	Mus Musculus (ncbitaxon:10090)		FALSE
OmicsDI	S-EPMC3607468	Integration of genome-wide association studies with biological knowledge identifies six novel genes related to kidney function.	Mus Musculus (ncbitaxon:10090)		FALSE
OmicsDI	S-EPMC7048086	The landscape of cardiovascular care in pediatric cancer patients and survivors: a survey by the ACC Pediatric Cardio-Oncology Work Group.	Mus Musculus (ncbitaxon:10090)		FALSE
OmicsDI	S-EPMC5745211	The Oxygen Paradox, the French Paradox, and age-related diseases.	Mus Musculus (ncbitaxon:10090)		FALSE
OmicsDI	PXD037633	Lfc phospho-proteome (Lfc subcellular localization and activity is controlled by Î±v-class integrin)	Mus Musculus (mouse)	Fibronectin (FN)-binding integrins control a variety of cellular responses through Rho GTPases. The FN-binding integrins, Î±vÎ²3 and Î±5Î²1, are known to induce different effects on cell morphology and motility. Here we report that FN-bound Î±vÎ²3 integrin, but not FN-bound Î±5Î²1 integrin, triggers the dissociation of the RhoA GEF Lfc (GEF-H1 in humans) from microtubules (MT), leading to the act…	FALSE
OmicsDI	S-EPMC4165626	Global, regional, and national levels of neonatal, infant, and under-5 mortality during 1990-2013: a systematic analysis for the Global Burden of Disease Study 2013.	Mus Musculus (mouse)		FALSE
OmicsDI	S-EPMC7614570	Global burden of chronic respiratory diseases and risk factors, 1990-2019: an update from the Global Burden of Disease Study 2019.	Mus Musculus (mouse)		FALSE
OmicsDI	S-EPMC8719276	Cancer Incidence, Mortality, Years of Life Lost, Years Lived With Disability, and Disability-Adjusted Life Years for 29 Cancer Groups From 2010 to 2019: A Systematic Analysis for the Global Burden of Disease Study 2019.	Mus Musculus (mouse)		FALSE
OmicsDI	S-EPMC7615984	Global Burden of Cardiovascular Diseases and Risks, 1990-2022.	Mus Musculus (mouse)		FALSE
OmicsDI	S-EPMC11447278	Forecasting the effects of smoking prevalence scenarios on years of life lost and life expectancy from 2022 to 2050: a systematic analysis for the Global Burden of Disease Study 2021.	Mus Musculus (mouse)		FALSE

## Sheet: PRIDEAPIFreeText
Repo	Id	Name	Organism	Description	Validation
PRIDE	PXD053477	Stage-Specific Serum Proteomic Signatures Reveal Early Biomarkers and Molecular Pathways in Huntingtonâ€™s Disease Progression	NA	This is a case control study consisting of 36 HD patients, more specifically of asymptomatic (n=18), early symptomatic (n=10) and symptomatic advanced (n=8) and 36 gender/age matched controls. A blood sample was collected from all study participants, using a standard protocol serum was extracted and stored at -80Â°C degrees until time of sample preparation and analysis.	TRUE
PRIDE	PXD063595	UBE2F inhibits Natural Killer cell tumor immunity by activating the ARIH2-CRL5 complex to degrade interleukin 15 receptors	NA	Interleukin-15 receptor (IL-15R) agonists induce anti-tumor immunity in pre-clinical models, however, dose-limiting toxicity has hampered their clinical development. An alternative is to target pathways downstream of the IL-15R to access different therapeutic profiles. We performed genome-wide CRISPR screens to reveal the complete IL15R signaling mechanism in NK cells and discovered ubiquitin-dep…	FALSE
PRIDE	PXD049972	Evaluation of the impact of the dietary inclusion of salty and sugary former food products on the liver and plasma profile of pigs through OMICS approaches	NA	The research on alternative and sustainable feed ingredients is a challenge to reduce feed-food competition between humans and monogastrics, in particular pigs. Former food products (FFPs) drop out from the industrial production of food such as pasta, bread, snacks, and chips. They have a high nutritional and energetic value and represent an alternative and sustainable feed ingredient. The aim of…	FALSE
PRIDE	PXD065892	Diagnostics of autoimmune hepatitis enabled by non-invasive clinical proteomics	NA	Autoimmune hepatitis (AIH) can be challenging to distinguish from other chronic liver diseases such as metabolic dysfunction-associated steatotic liver disease (MASLD). We applied advanced proteomic analysis to paired liver and plasma samples from newly diagnosed AIH patients, MASLD patients, and healthy controls to uncover disease-specific pathways and biomarkers. We quantified 7632 liver and 55…	FALSE

[truncated: 1 more sheets: PRIDEAPIFilter]
